# Supplementary material
Source: PubMed Central journal article supplement (PMC9935273)
Supplement: mmc1.pdf [file mmc1.pdf]

**Supplemental information**

**SARS-CoV-2 Spike protein induces  
TLR4-mediated long-term cognitive dysfunction  
recapitulating post-COVID-19 syndrome in mice**

**Fabricia L. Fontes-Dantas, Gabriel G. Fernandes, Elisa G. Gutman, Emanuelle V. De Lima, Leticia S. Antonio, Mariana B. Hammerle, Hannah P. Mota-Araujo, Lilian C. Colodeti, Suzana M.B. Araújo, Gabrielle M. Froz, Talita N. da Silva, Larissa A. Duarte, Andreza L. Salvio, Karina L. Pires, Luciane A.A. Leon, Claudia Cristina F. Vasconcelos, Luciana Romão, Luiz Eduardo B. Savio, Jerson L. Silva, Robson da Costa, Julia R. Clarke, Andrea T. Da Poian, Soniza V. Alves-Leon, Giselle F. Passos, and Claudia P. Figueiredo**

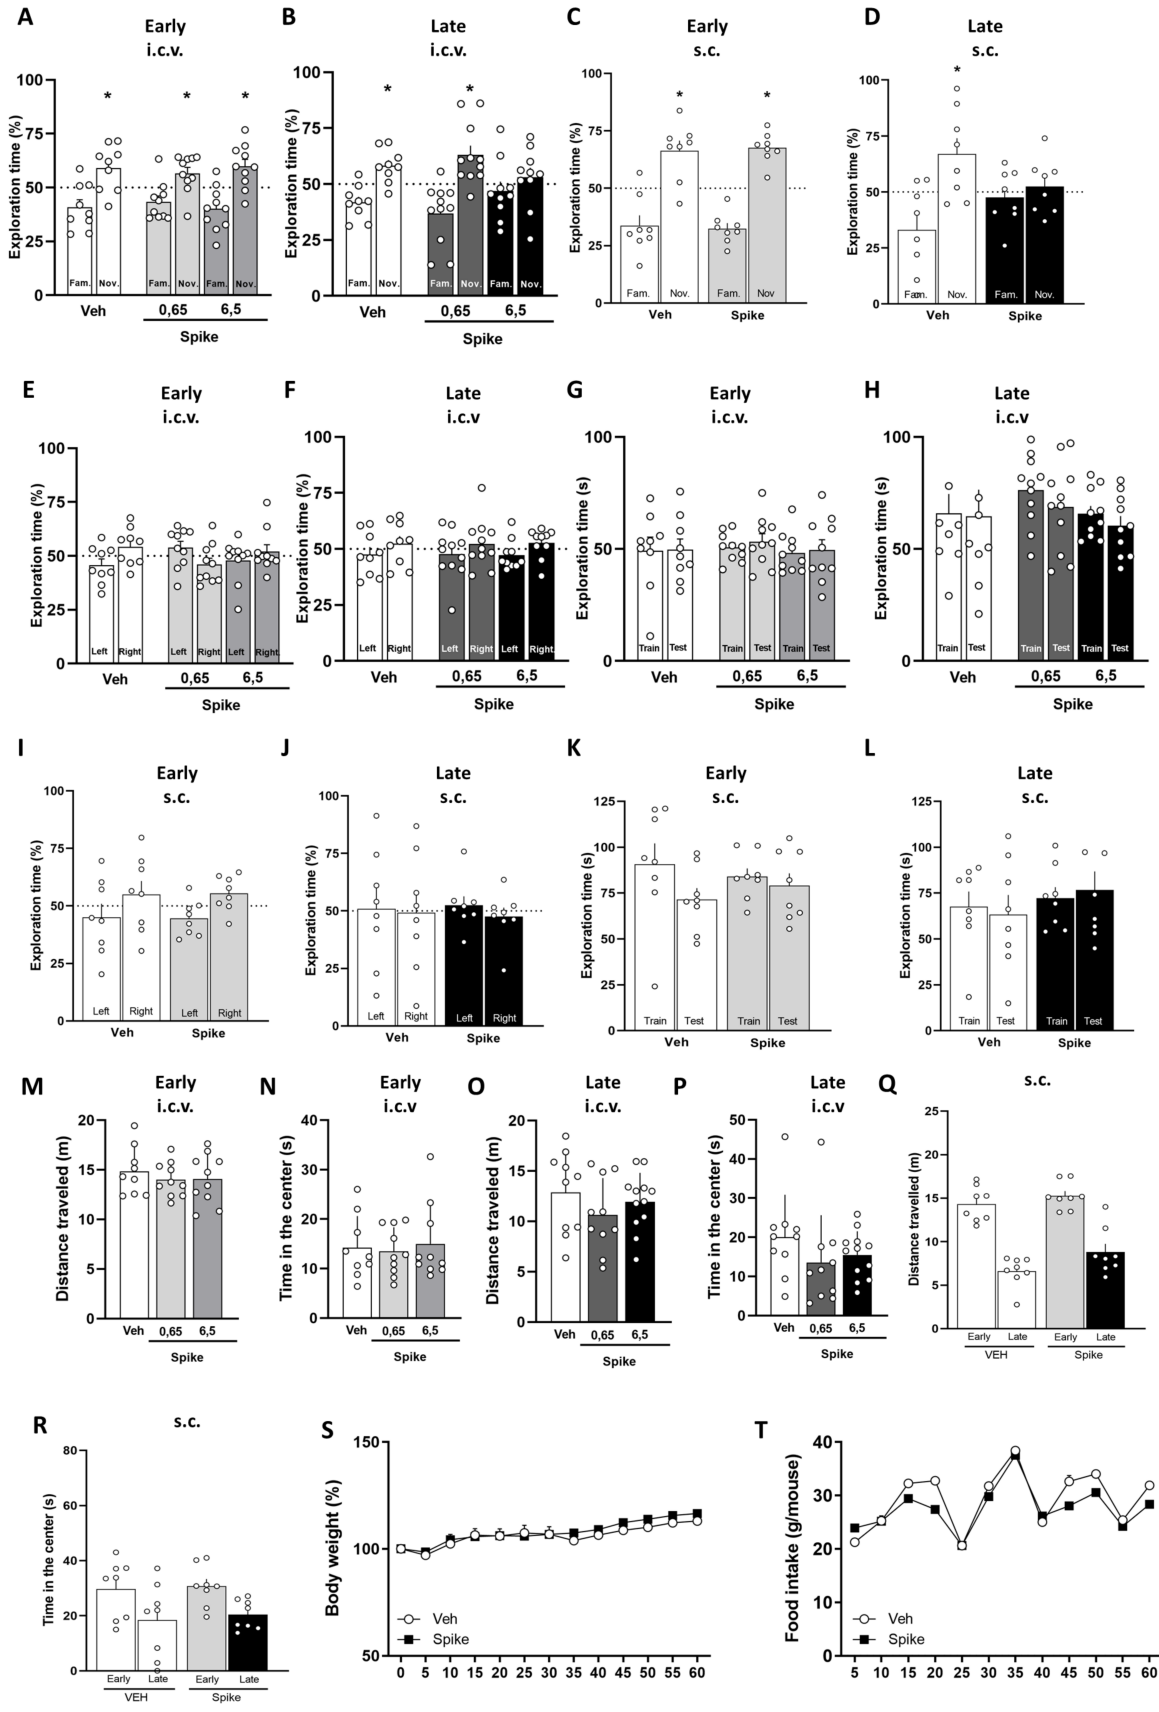

**Supplementary Fig. 1 Behavioral analysis of mice infused with SARS-CoV-2 Spike protein by intracerebroventricular (i.c.v.) or subcutaneous (s.c.) route. Related to Figure 1.** Mice were infused with vehicle (Veh) or Spike protein by i.c.v. (0,65 or 6,5  $\mu\text{g}/\text{site}$ ) or s.c. (10  $\mu\text{g}$ ) route and were evaluated at early (6 days) and late (45 days) time points. **(A and B)** Mice were tested in the novel object recognition (NOR) test at early (**A**;  $t = 2.578$ ,  $*p = 0.0327$  for Veh,  $t = 2.400$   $*p = 0.0399$ , for 0,65  $\mu\text{g}$  Spike,  $t = 3.052$   $*p = 0.0138$ , for 6,5  $\mu\text{g}$  Spike) or late (**B**;  $t = 3.307$ ,  $*p = 0.0107$  for Veh,  $t = 3.214$   $*p = 0.0093$ , for 0,65  $\mu\text{g}$  Spike,  $t = 0.7246$   $p = 0.4871$ , for 6,5  $\mu\text{g}$  Spike) time points after i.c.v. infusion. **(C and D)** Mice were tested in the novel object recognition (NOR) test at early (**C**:  $t = 3.647$ ,  $*p = 0.0082$  for Veh; and  $t = 7.466$ ,  $*p = 0.0001$ , for Spike) or late (**D**)  $t = 2.416$ ,  $*p = 0.0463$  for Veh and  $t = 0.5562$ ,  $p = 0.5954$ , for Spike) time points after s.c. infusion. One-sample Student's t-test compared to the chance level of 50%;  $N = 8-11$  mice per group). **(E-L)** Neither i.c.v. nor s.c. Spike protein infusion affected innate object preferences during the training session (**E and F, I and J**), or exploratory activity (**G and H, K and L**) during the test session of NOR at early and late time points after protein infusion. **(E)** Early stage ( $t = 1.477$ ,  $p = 0.1789$  for Veh,  $t = 1.357$ ,  $p = 0.2079$ , for 0,65  $\mu\text{g}$  Spike,  $t = 0.6648$   $p = 0.5228$ , for 6,5  $\mu\text{g}$  Spike), and **(F)** late stage ( $t = 0.7313$ ,  $p = 0.4855$  for Veh,  $t = 0.7105$   $p = 0.4937$ , for 0,65  $\mu\text{g}$  Spike,  $t = 1.277$ ,  $p = 0.2336$ , for 6,5  $\mu\text{g}$  Spike) after i.c.v. infusion. One-sample Student's t-test compared to the chance level of 50% ( $N = 9-11$  mice per group). **(G)** Early stage ( $F = 1.1411$ ,  $p = 0.3345$  for Training and  $F = 0.2435$ ,  $p = 0.7857$  for Test), and **(H)** late stage ( $F = 0.1117$ ,  $p = 0.8947$  for Training and  $F = 0.3122$ ,  $p = 0.7344$  for Test) after i.c.v. infusion. One-way ANOVA test, followed by Tukey's test ( $N = 9 - 11$  mice per group). **(I)** Early stage ( $t = 0.8437$ ,  $p = 0.4267$  for Veh; and  $t = 2.008$ ,  $p = 0.0846$ , for Spike), and **(J)** late stage ( $t = 0.9215$ ,  $p = 0.9292$  for Veh and  $t = 0.6250$ ,  $p = 0.5518$ , for Spike) after s.c. infusion. One-sample Student's t-test compared to the chance level of 50%;  $N = 8$  mice per group. **(K)** Early stage ( $t = 0.5526$ ,  $p = 0.5893$  for Training and  $t = 0.8203$   $p = 0.4258$ , for Test), and **(L)** Late stage ( $t = 0.4536$ ,  $p = 0.6570$  for Training and  $t = 0.9041$ ,  $p = 0.3812$ , for Test) after s.c. infusion; Student's t-test;  $N = 8$  mice per group. **(M, O and Q)** Total distance traveled and **(N, P and R)** time spent at the center of the open field arena by or i.c.v.- (**M-P**), or s.c.-infused (**Q and R**) mice. **(M)** Early stage ( $F = 0.4086$ ,  $p = 0.6688$ ). **(O)** Late stage ( $F = 1.231$ ,  $p = 0.3074$ ). One-way ANOVA test, followed by Tukey's test;  $N = 9 - 11$  mice per group. **(N)** Early stage ( $F = 0.1360$ ,  $p = 0.8734$ , One-way ANOVA test, followed by Tukey's test). **(P)** Late stage ( $p = 0.1103$ , Kruskal-Wallis test).  $N = 9 - 11$  mice per group. **(Q)**  $t = 1.057$ ,  $p = 0.3085$  for early, and  $t = 1.967$ ,  $p = 0.0693$  for late stage; **(R)**  $t = 0.2321$ ,  $p = 0.8191$  for early, and  $t = 0.3775$ ,  $p = 0.7115$  for late stage. Student's t-test;  $N = 8$  mice per group. **(S)** Body weight ( $F(12, 182) = 0.3791$ ,  $p = 0.9696$ , and **(T)** food intake ( $F(11, 168) = 1.444$ ,  $p = 0.1576$ ) measured for up to 60 days following Veh or Spike s.c. infusion. Two-way ANOVA test followed by Bonferroni ( $N = 8$  mice per group). Bars or points represent means  $\pm$ SEM. Symbols represent individual mice.

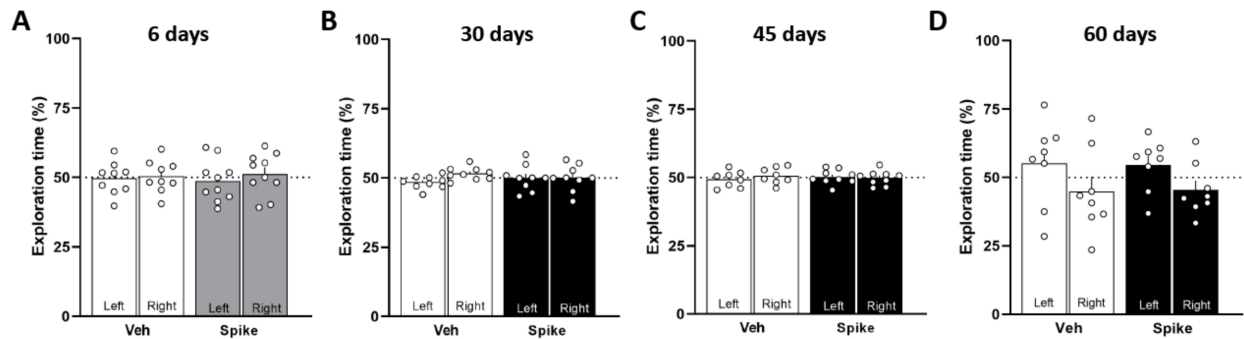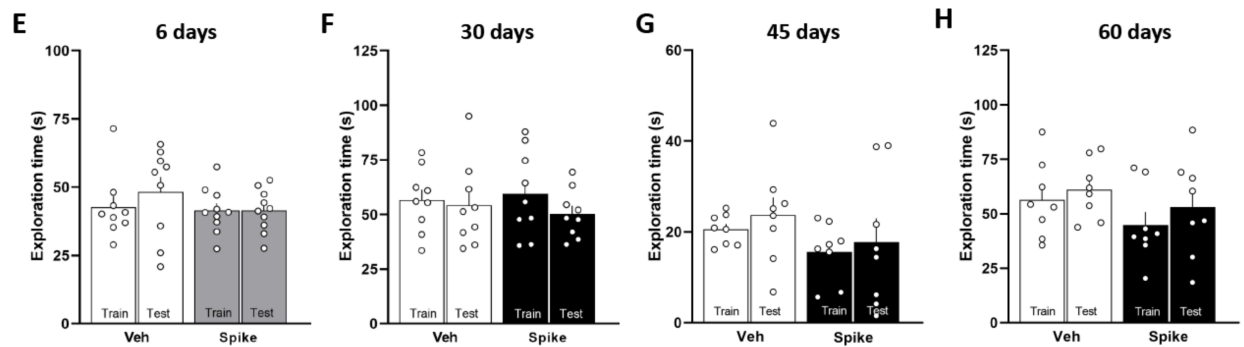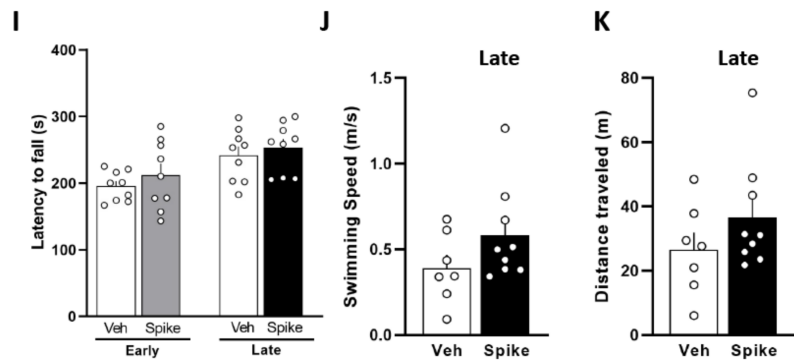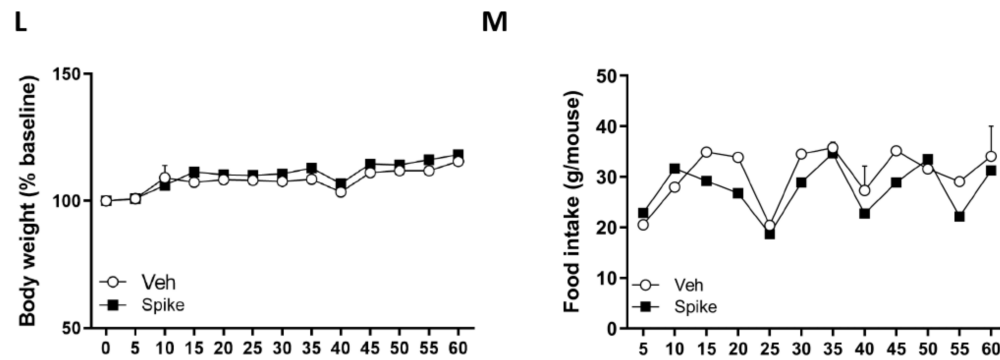

**Supplementary Fig. 2 Controls for behavioral analysis of mice infused with SARS-CoV-2 Spike protein. Related to Figure 1.** Mice were infused with vehicle (Veh) or Spike protein by i.c.v. (6,5  $\mu\text{g}/\text{site}$ ) route, and were evaluated at different time points after infusion. Intracerebroventricular (i.c.v.) infusion of Spike protein had no effect on innate preference for the objects during the training session (**A-D**), or exploratory activity (**E-H**) during the test session of novel object recognition (NOR) test at 6, 30, 45 and 60 days after protein infusion. (**A**) 6 days ( $t = 0.1869$ ,  $p = 0.8564$  for Veh; and  $t = 0.5302$ ,  $p = 0.6088$ , for Spike), (**B**) 30 days ( $t = 2.009$ ,  $p = 0.0794$  for Veh; and  $t = 0.03443$ ,  $p = 0.9734$ , for Spike), (**C**) 45 days ( $t = 0.6465$ ,  $p = 0.5386$  for Veh; and  $t = 0.2022$ ,  $p = 0.8448$ , for Spike), and (**D**) 60 days ( $t = 0.9527$ ,  $p = 0.3725$  for Veh; and  $t = 1.381$ ,  $p = 0.2098$ , for Spike). One-sample Student's t-test compared to the chance level of 50%;  $N = 8 - 10$  mice per group. (**E**) 6 days ( $t = 0.2549$ ,  $p = 0.8019$  for Training and  $t = 1.174$ ,  $p = 0.2565$  for Test), (**F**) 30 days ( $t = 0.3569$ ,  $p = 0.7258$  for Training and  $t = 0.8627$ ,  $p = 0.4011$ , for Test), (**G**) 45 days ( $t = 1.921$ ,  $p = 0.07553$  for Training and  $t = 0.9256$ ,  $p = 0.3793$ , for Test), (**H**) 60 days  $t = 1.346$ ,  $p = 0.1998$  for Training and  $t = 0.8578$ ,  $p = 0.4055$ , for Test). Student's t-test;  $N = 8 - 10$  mice per group. (**I**) No difference between groups was found when mice were tested in the Rotarod task at early (6 days;  $t = 0.9060$ ,  $p = 0.3784$ ) and late (45 days;  $t = 0.6381$ ,  $p = 0.5325$ ) time points following Veh or Spike infusion. Student's t-test;  $N = 9$  mice per group. Spike protein had no effect on swimming speed (**J**  $p = 0.1416$ ) or total distance traveled (**K**  $p = 0.2523$ ) in the Morris Water Maze at the late stage (45 days post infusion). Mann-Whitney U test;  $N = 7 - 9$  mice per group. (**L**) Body weight ( $F(12, 182) = 0.2997$ ,  $p = 0.9888$ , and (**M**) food intake ( $F(11, 168) = 1.592$ ,  $p = 0.1051$ ) measured for up to 60 days following Veh or Spike i.c.v. infusion. Two-way ANOVA test followed by Bonferroni ( $N = 8$  mice per group). Bars or points represent means  $\pm$ SEM. Symbols represent individual mice.

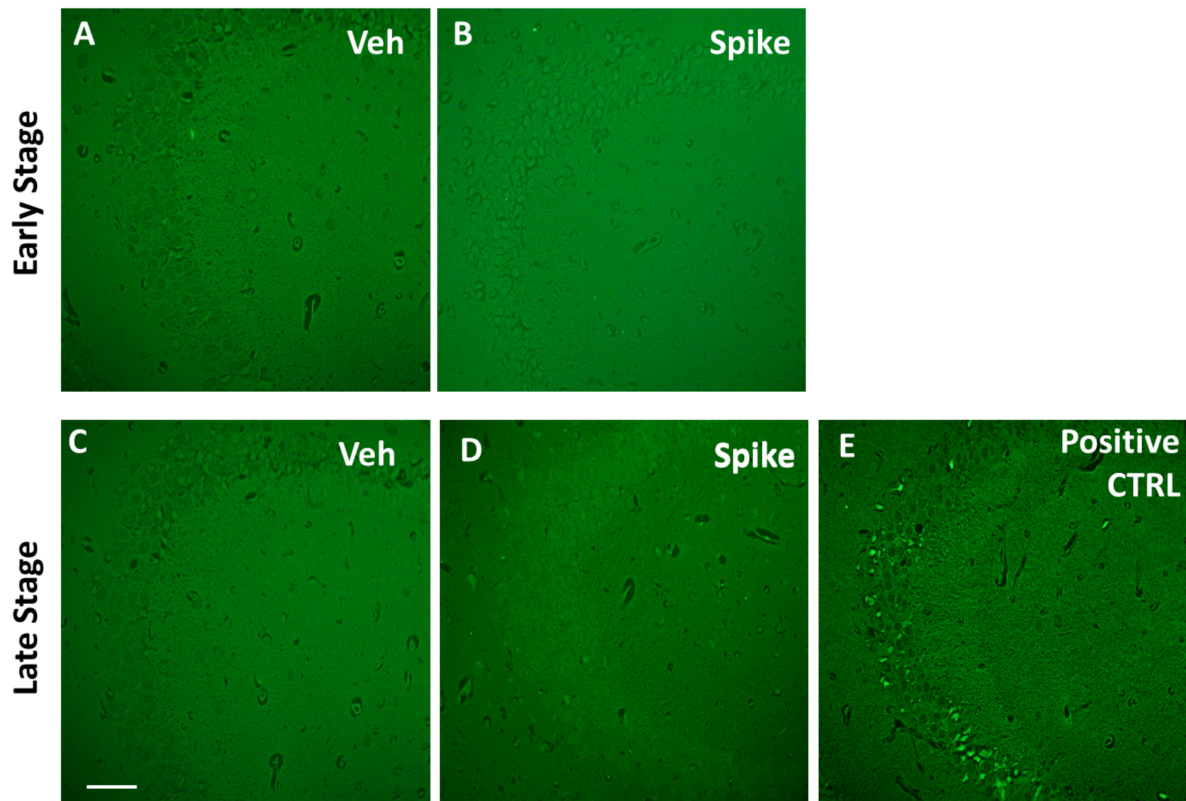

**Supplementary Fig. 3 Analysis of neuronal cell death in the hippocampus of SARS-CoV-2 Spike protein-infused mice. Related to Figure 1.** Mice received an i.c.v. infusion of 6,5  $\mu\text{g}$  SARS-CoV-2 spike protein (Spike) or vehicle (Veh), and brains were processed for Fluoro-Jade B staining. Representative staining of the hippocampal DG region at early (7 days; **A and B**) and late (45 days; **C and D**) time points after infusion.  $N = 4$  mice per group. (**E**) Fluoro-Jade B staining positive control consisted of brain sections of a mouse infused i.c.v. with the neurotoxin quinolinic acid. Scale bar = 50 $\mu\text{m}$ .

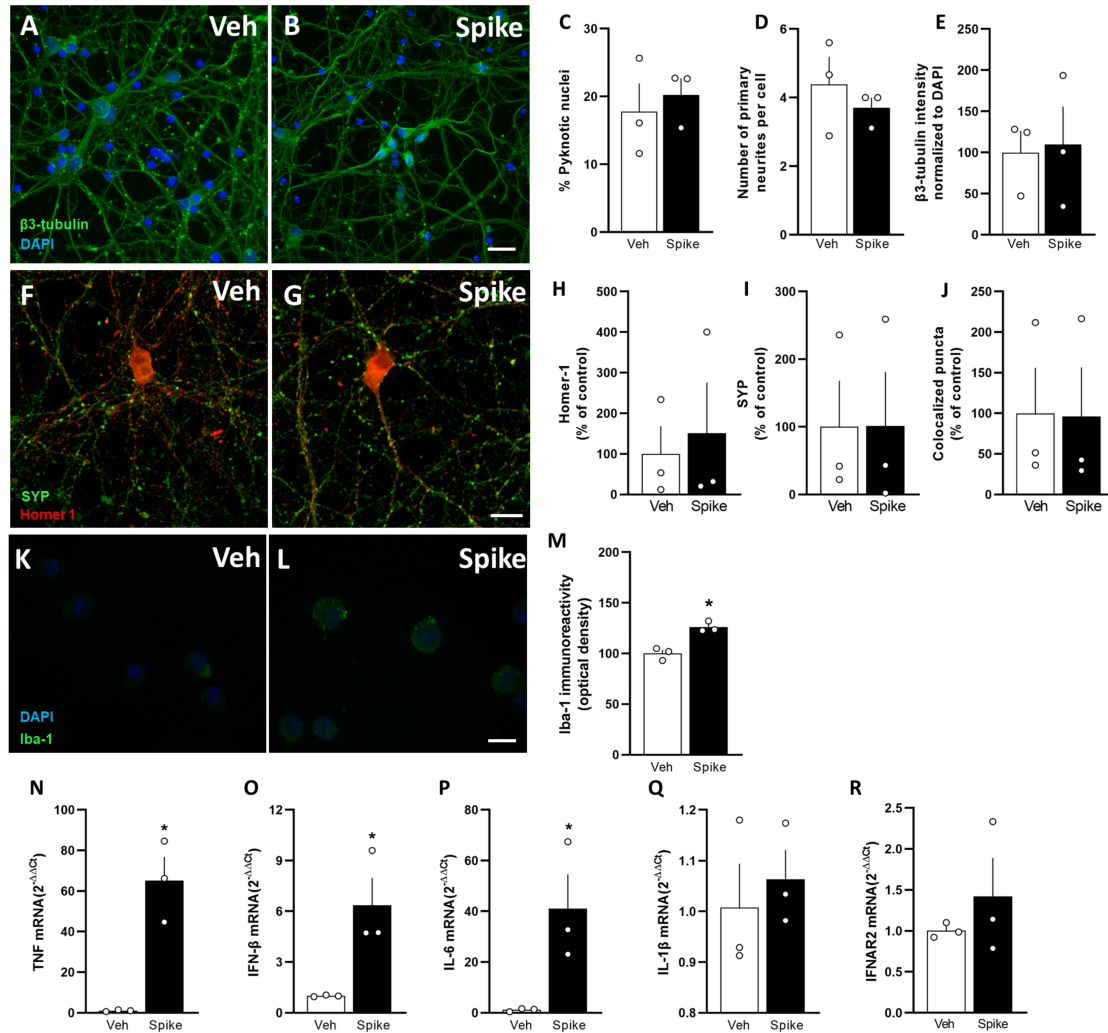

**Supplementary Fig. 4 Effect of SARS-CoV-2 Spike protein incubation in microglial and neuronal cultures. Related to Figure 2.** (A-J) Cultured primary cortical neurons were incubated with Spike protein (1 $\mu$ g/mL) or vehicle (Veh) for 24h, and analyzed by immunocytochemistry. (A and B) Representative images of  $\beta$ 3-tubulin and DAPI immunoreactivity. Scale bar = 50 $\mu$ m. (A-E) Spike protein causes no changes in neither number of pyknotic nuclei (C;  $p > 0.9999$ , Mann-Whitney U test) and primary neurites (D;  $t = 0.8031, p = 0.4669$ , Student's t-test), nor  $\beta$ 3-tubulin intensity (E;  $t = 0.1824, p = 0.8642$ , Student's t-test). (F and G) Representative images of Homer-1 and synaptophysin (SYP) immunoreactivity. Scale bar = 10 $\mu$ m. (F-J) Spike protein also induces no difference in the number of synapses in cortical neurons, as demonstrated by double immunostaining for Homer-1 (H;  $p > 0.9999$ , Mann-Whitney U test), SYP (I;  $t = 0.01403, p = 0.9895$ , Student's t-test), and colocalized Homer-1/SYP puncta (J;  $t = 0.04320, p = 0.9676$ , Student's t-test).  $N = 3$  experiments with independent neuron cultures. (K and L) Representative images of IBA-1 immunoreactivity in BV-2 cells incubated for 24 h with vehicle (Veh; K) or Spike protein (L; 1  $\mu$ g/mL). Scale bar = 50 $\mu$ m. (M) Iba-1 and DAPI immunoreactivity ( $t = 5.567, *p = 0.0051$ ). (N-R) BV2 cells incubated with Spike or Veh were analyzed by qPCR for mRNA levels of TNF (N;  $t = 5.557, *p = 0.0051$ ), IFN- $\beta$  (O;  $t = 3.307, *p = 0.0297$ ), IL-6 (P;  $t = 2.968, *p = 0.0412$ ), IL-1 $\beta$  (Q;  $t = 0.5398, p = 0.6180$ ), and IFNAR2 (R;  $t = 0.8884, p = 0.4245$ ). Student's t-test;  $N = 3$ . Bars represent means  $\pm$ SEM.

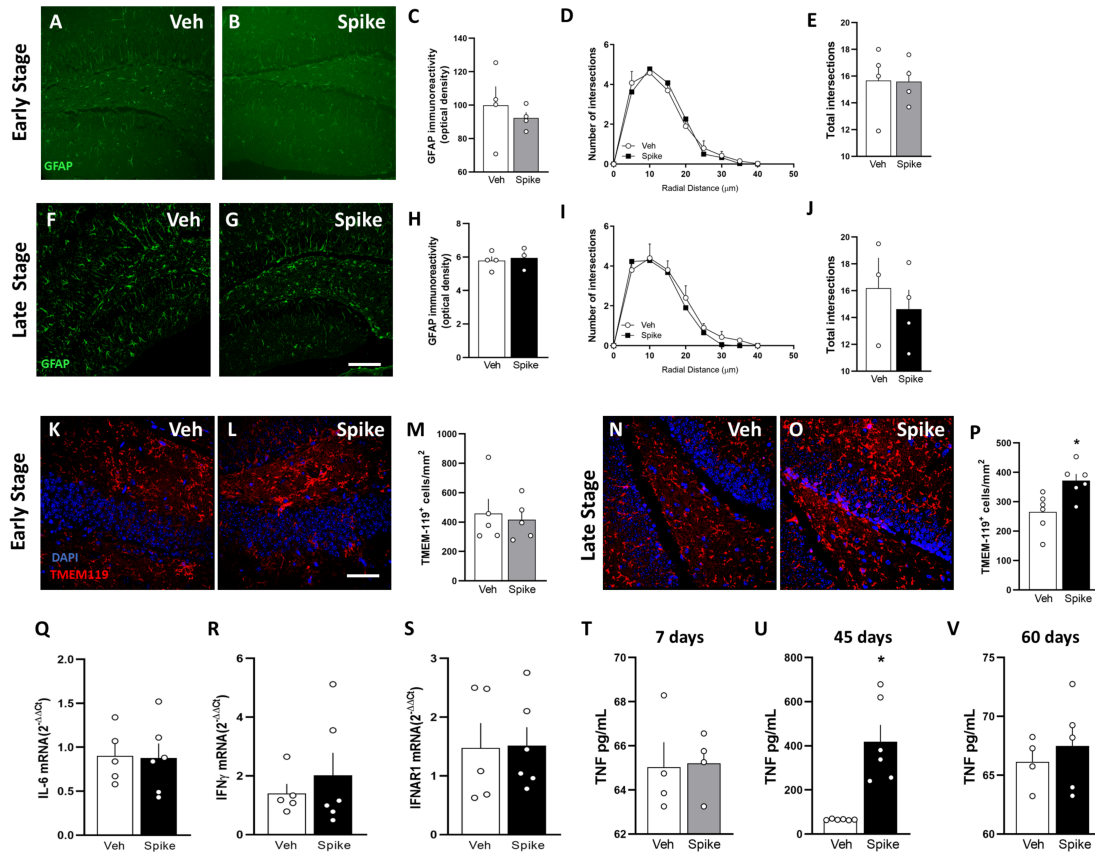

**Supplementary Fig 5 Analysis of glial cell activation and cytokine expression in the hippocampus of SARS-CoV-2 Spike protein-infused mice. Related to Figure 2.** Mice received an i.c.v. infusion of 6,5  $\mu\text{g}$  SARS-CoV-2 spike protein (Spike) or vehicle (Veh), and brains were processed for analysis at early (7 days) and late (45 and 60 days) time points. (A–J) Spike protein had no effect on GFAP immunoreactivity or GFAP-positive cell morphology in the DG region of the hippocampus. Representative images of GFAP immunoreactivity at early (A and B) and late (F and G; 45 days) time points. Scale bar =  $20\mu\text{m}$ . GFAP immunoreactivity (C  $t = 0.6543$ ,  $p = 0.5372$ ), and Sholl analysis (D and E;  $F(8, 54) = 0.5484$ ,  $p = 0.8147$ , and  $t = 0.05462$ ,  $p = 0.9582$ , respectively) at the early stage of the model. GFAP immunoreactivity (H;  $t = 0.3638$ ,  $p = 0.7309$ ), and Sholl analysis (I and J;  $F(8, 45) = 0.3151$ ,  $p = 0.9563$ , and  $t = 0.6199$ ,  $p = 0.5625$ , respectively) at the late stage of the model (45 days). Two-way ANOVA test followed by Bonferroni (D and I), and Student’s t-test (E and J).  $N = 3 - 4$  mice per group. Representative images of TMEM-119 immunoreactivity at early (K and L) and late (N and O; 45 days) time points in hippocampal DG region. Scale bar =  $20\mu\text{m}$ . TMEM-119-positive cells in the hippocampi of Veh- or Spike-infused mice in the early (M;  $t = 0.3669$ ;  $p = 0.7232$ ) and late (P;  $t = 3.036$ ;  $*p = 0.0125$ ; 45 days) stages of the model. Student’s t-test,  $N = 5$  mice per group). (Q–S) qPCR analysis of indicated mRNA isolated from the hippocampus in the late stage of the model (45 days). Spike protein infusion had no effect on mRNA levels of IL-6 (Q;  $t = 0.0979$ ;  $p = 0.9241$ ), IFN $\gamma$  (R;  $t = 0.9586$ ;  $p = 0.3304$ ) and IFNAR1 (S;  $t = 0.3336$ ;  $p = 0.7456$ ).  $N = 5 - 6$  mice per group. (T–V) ELISA analysis of time-dependent serum levels of TNF in Veh- or Spike-infused mice at 7 days (T;  $t = 0.128$ ;  $p = 0.9021$ ), 45 days (U;  $t = 4.636$ ;  $*p = 0.009$ ), and 60 days post-infusion (V;  $t = 0.6137$ ,  $p = 0.5588$ ). Student’s t-test;  $N = 4 - 6$  mice per group. Bars or points represent means  $\pm$ SEM. Symbols represent individual mice.



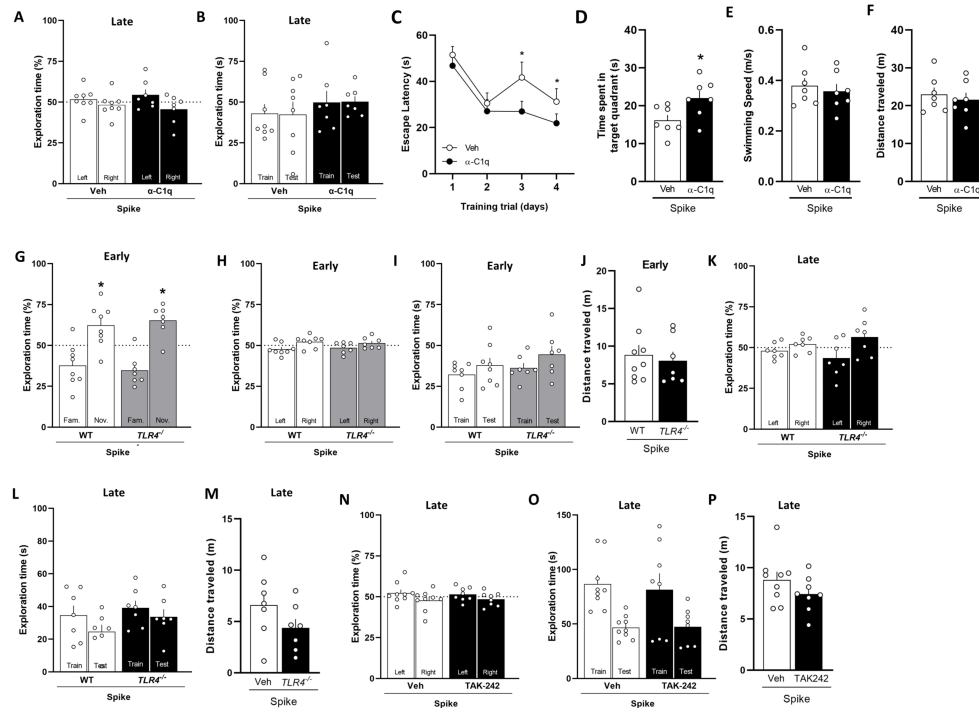

**Supplementary Fig 6 Controls for behavioral analysis of SARS-CoV-2 Spike protein-infused mice with TLR4 or C1q blockade. Related to Figure 3 and Figure 4.** Mice were infused with Spike protein (6,5  $\mu\text{g}/\text{site}$ , i.c.v.), and were treated with vehicle (Veh) or an anti-C1q antibody ( $\alpha\text{-C1q}$ ; 0.3  $\mu\text{g}$  twice a week for 30 days) or the TLR4 inhibitor TAK-242 (2mg/kg i.p., daily for one week). In some experiments, TLR4<sup>-/-</sup> mice on the C57BL/6 background were used. Mice were evaluated in behavioral tests at early (6 days) and/or late (45 days) time points. Spike infusion had no effect on innate preferences for the objects during the training session (**A, H, K and N**) or the exploratory activity during the test session (**B, I, L and O**) of the NOR test ( $N = 7 - 9$  mice per group). (**A**)  $t = 0.7062$ ,  $p = 0.5029$  for Veh; and  $t = 1.323$ ,  $p = 0.2340$ , for  $\alpha\text{-C1q}$ . One-sample Student's t-test compared to the chance level of 50%. (**B**)  $t = 0.7542$ ,  $p = 0.4642$  for Training and  $t = 0.8826$ ,  $p = 0.3835$  for Test. Student's t-test. (**C**) Escape latencies across 4 consecutive training trials  $F(3, 36) = 0.6463$ ,  $p = 0.5904$ , repeated measures ANOVA followed by Tukey's test), and (**D**) time spent in the target quadrant ( $t = 2.439$ ,  $*p = 0.0312$ ), (**E**) swimming speed ( $t = 0.5104$ ,  $p = 0.6190$ ), and (**F**) total distance traveled ( $t = 0.5370$ ,  $p = 0.6011$ ) during the probe trial of the MWM test performed at the late stage. Student's t-test;  $N = 7 - 9$  mice per group). (**G**) Spike protein does not impair object recognition memory in WT and TLR4<sup>-/-</sup> mice, early after protein infusion ( $t = 2.66$   $*p = 0.0323$  for WT and  $t = 4.18$ ;  $*p = 0.0058$  for TLR4<sup>-/-</sup>); one-sample Student's t-test compared to the chance level of 50% ( $N = 7 - 8$  mice per group). (**H**)  $t = 1.756$ ,  $p = 0.1225$  for WT; and  $t = 1.132$ ,  $p = 0.3007$ , for TLR4<sup>-/-</sup>. One-sample Student's t-test compared to the chance level of 50%. (**I**)  $t = 1.005$ ,  $p = 0.3334$  for Training and  $t = 0.9718$ ,  $p = 0.3489$ , for Test.. Student's t-test. (**K**)  $t = 1.128$ ,  $p = 0.3025$  for WT; and  $t = 1.495$ ,  $p = 0.1854$ , for TLR4<sup>-/-</sup>. One-sample Student's t-test compared to the chance level of 50%. (**L**)  $t = 1.433$ ,  $p = 0.1775$  for Training and  $t = 1.433$ ,  $p = 0.1775$  for Test. Student's t-test. (**N**)  $t = 1.081$ ,  $p = 0.3114$  for Veh; and  $t = 0.9918$ ,  $p = 0.3543$  for TAK-242. One-sample Student's t-test compared to the chance level of 50%. (**O**)  $t = 0.3194$ ,  $p = 0.7539$  for Training and  $t = 0.08751$ ,  $p = 0.9314$  for Test. Student's t-test. Genetic (**J and M**) or pharmacological (**P**) inhibition of TLR4 signaling does not affect total distance traveled in the open field arena. (**J**)  $t = 0.4239$ ,  $p = 0.6781$ . (**M**)  $t = 1.498$ ,  $p = 0.1600$ . (**P**)  $t = 1.349$ ,  $p = 0.1974$ . Student's t-test,  $N = 7 - 9$  mice per group. Bars or points represent means  $\pm$ SEM. Symbols represent individual mice.

Supplementary Table 1. Participant demographics of the study sample. Related to Figure 4.

| Sample demographics                                                       | Number of individuals (%)<br>(total N = 86) |
|---------------------------------------------------------------------------|---------------------------------------------|
| Sex                                                                       |                                             |
| Female                                                                    | 70 (81.4%)                                  |
| Male                                                                      | 16 (18.6%)                                  |
| Age (years) <sup>a</sup>                                                  | 45.6 (19-71)                                |
| Time between onset of clinical symptoms and cognitive assessment (months) | 5.89 (1-15)                                 |
| Education <sup>a</sup> (years)                                            | 17.02 (5-28)                                |
| Comorbidities                                                             |                                             |
| 1. None                                                                   | 40 (45.5%)                                  |
| 2. Obesity                                                                | 19 (22.1%)                                  |
| 3. Hypertension                                                           | 17 (19.7%)                                  |
| 4. Diabetes                                                               | 10 (11.6%)                                  |

a = mean (range)

Supplementary Table 2. List of primers used in qPCR analyses for mouse and human samples. Related to Figure 2, Figure 3 and Figure 4.

| Target gene    | Forward primer             | Reverse primer           |
|----------------|----------------------------|--------------------------|
| Mouse          |                            |                          |
| $\beta$ -Actin | GCCCTGAGGCTCTTTTCCAG       | TGCCACAGGATTCCATACCC     |
| TNF            | CCCTCACACTCAGATCATCTTCT    | GCTACGACGACGTGGGCTACAG   |
| IFN $\beta$    | CACAGCCCTCTCCATCAACTA      | CATTTCCGAATGTTCGTCCT     |
| Il6            | GCTACCAAACCTGGATATAATCAGGA | CCAGGTAGCTATGGTACTCCAGAA |
| IL1- $\beta$   | GTAATGAAAGACGGCACACC-      | ATTAGAAACAGTCCAGCCCA-    |
| IFNAR1         | CTGGTCTGTGAGCTGTACTT       | TCCCCGCAGTATTGATGAGT     |
| IFNAR2         | CTATCGTAATGCTGAAACGG       | CGTAATTCCACAGTCTCTTCT    |
| IFN $\gamma$   | AGCAACAGCAAGGCGAAAA        | CTGGACCTGTGGGTTGTTGA     |
| C1q            | CTCAGGGATGGCTGGTGGCC       | CCTTTGAGACCCGGCCTCCCC    |
| TLR4           | GTCAGTGTGATTGTGGTATCC      | ACCCAGTCCTCATTCTGACTC    |
| Human          |                            |                          |
| $\beta$ -Actin | ACCAACTGGGACGACATGGA       | CCAGAGGCGTACAGGGATAG     |
| TLR4           | AAGCCGAAAGGTGATTGTTG       | CTGAGCAGGGTCTTCTCCAC     |
