# Supplementary material
Source: PubMed Central journal article supplement (PMC9935273)
Supplement: mmc2.pdf [file mmc2.pdf]

## SARS-CoV-2 Spike protein induces TLR4-mediated long-term cognitive dysfunction recapitulating post-COVID-19 syndrome in mice

### Graphical abstract

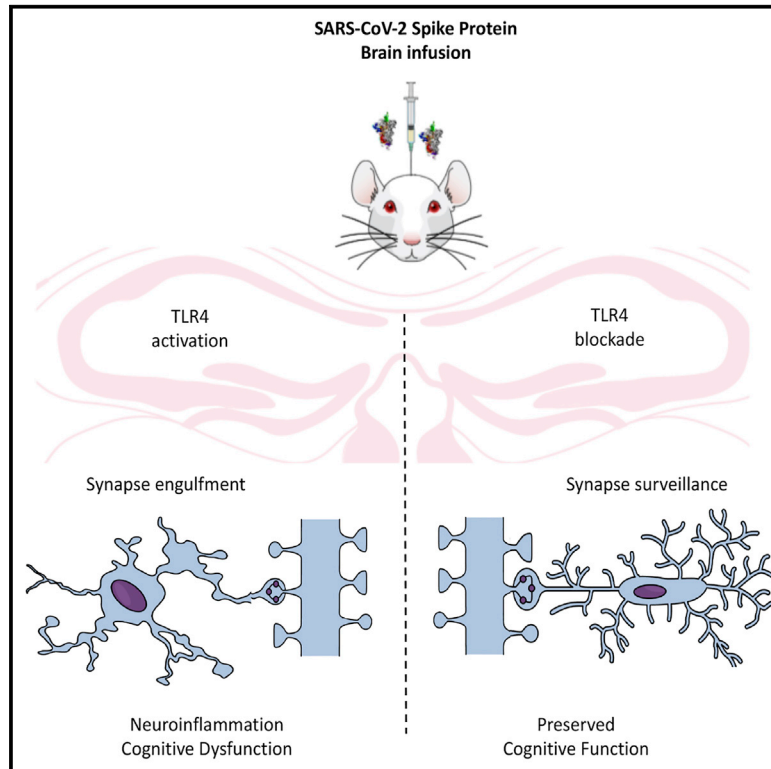

### Highlights

- Spike protein infusion into mouse brain induces late cognitive dysfunction
- Spike protein induces late hippocampal microgliosis and synapse loss
- Blockage of TLR4 renders mice resistant to Spike-induced cognitive dysfunction
- *TLR4-2604G>A* GG genotype was related to poor cognitive outcome in COVID-19 patients

### Authors

Fabricia L. Fontes-Dantas, Gabriel G. Fernandes, Elisa G. Gutman, ..., Soniza V. Alves-Leon, Giselle F. Passos, Claudia P. Figueiredo

### Correspondence

dapoian@bioqmed.ufrj.br (A.T.D.P.), sonizavieiraalvesleon@gmail.com (S.V.A.-L.), gfazzioni@yahoo.com.br (G.F.P.), claudia@pharma.ufrj.br (C.P.F.)

### In brief

Cognitive impairment is frequent in post-COVID-19 syndrome patients, but its underlying mechanisms are unclear. Fontes-Dantas et al. show that Spike brain infusion in mice induces late neuroinflammation and synapse loss, leading to long-term cognitive impairment mediated by TLR4 signaling. In patients, genotype GG *TLR4-2604G>A* was associated with poor cognitive outcome.

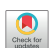

## Article

# SARS-CoV-2 Spike protein induces TLR4-mediated long-term cognitive dysfunction recapitulating post-COVID-19 syndrome in mice

Fabricia L. Fontes-Dantas,<sup>1,2,11</sup> Gabriel G. Fernandes,<sup>1,11</sup> Elisa G. Gutman,<sup>3,4,11</sup> Emanuelle V. De Lima,<sup>1</sup> Leticia S. Antonio,<sup>1</sup> Mariana B. Hammerle,<sup>4</sup> Hannah P. Mota-Araujo,<sup>1</sup> Lilian C. Colodeti,<sup>1</sup> Suzana M.B. Araújo,<sup>1</sup> Gabrielle M. Froz,<sup>1</sup> Talita N. da Silva,<sup>1</sup> Larissa A. Duarte,<sup>3,4</sup> Andreza L. Salvio,<sup>3</sup> Karina L. Pires,<sup>5</sup> Luciane A.A. Leon,<sup>6</sup> Claudia Cristina F. Vasconcelos,<sup>5</sup> Luciana Romão,<sup>7</sup> Luiz Eduardo B. Savio,<sup>8</sup> Jerson L. Silva,<sup>9</sup> Robson da Costa,<sup>1</sup> Julia R. Clarke,<sup>7</sup> Andrea T. Da Poian,<sup>9,\*</sup> Soniza V. Alves-Leon,<sup>3,10,\*</sup> Giselle F. Passos,<sup>1,\*</sup> and Claudia P. Figueiredo<sup>1,12,\*</sup>

<sup>1</sup>School of Pharmacy, Federal University of Rio de Janeiro, Rio de Janeiro, RJ, Brazil

<sup>2</sup>Department of Pharmacology, Institute of Biology, Rio de Janeiro State University, Rio de Janeiro, RJ, Brazil

<sup>3</sup>Translational Neuroscience Laboratory (LabNet), Post-Graduate Program in Neurology, Federal University of Rio de Janeiro State, Rio de Janeiro, RJ, Brazil

<sup>4</sup>Clinical Medicine Post-graduation Program, Federal University of Rio de Janeiro, Rio de Janeiro, RJ, Brazil

<sup>5</sup>Neurology Department, Federal University of the State of Rio de Janeiro (UNIRIO), Rio de Janeiro, RJ, Brazil

<sup>6</sup>Laboratório de Desenvolvimento Tecnológico em Virologia, IOC/FIOCRUZ, Rio de Janeiro, RJ, Brazil

<sup>7</sup>Institute of Biomedical Sciences, Federal University of Rio de Janeiro, Rio de Janeiro, RJ, Brazil

<sup>8</sup>Institute of Biophysics Carlos Chagas Filho, Federal University of Rio de Janeiro, Rio de Janeiro, RJ, Brazil

<sup>9</sup>Institute of Medical Biochemistry Leopoldo de Meis, Federal University of Rio de Janeiro, Rio de Janeiro, RJ, Brazil

<sup>10</sup>Division of Neurology, Hospital Clementino Fraga Filho, Federal University of Rio de Janeiro, Rio de Janeiro, RJ, Brazil

<sup>11</sup>These authors contributed equally

<sup>12</sup>Lead contact

\*Correspondence: [dapoian@bioqmed.ufrj.br](mailto:dapoian@bioqmed.ufrj.br) (A.T.D.P.), [sonzavieiraalvesleon@gmail.com](mailto:sonzavieiraalvesleon@gmail.com) (S.V.A.-L.), [gfazzioni@yahoo.com.br](mailto:gfazzioni@yahoo.com.br) (G.F.P.), [claudia@pharma.ufrj.br](mailto:claudia@pharma.ufrj.br) (C.P.F.)

<https://doi.org/10.1016/j.celrep.2023.112189>

## SUMMARY

Cognitive dysfunction is often reported in patients with post-coronavirus disease 2019 (COVID-19) syndrome, but its underlying mechanisms are not completely understood. Evidence suggests that severe acute respiratory syndrome coronavirus 2 (SARS-CoV-2) Spike protein or its fragments are released from cells during infection, reaching different tissues, including the CNS, irrespective of the presence of the viral RNA. Here, we demonstrate that brain infusion of Spike protein in mice has a late impact on cognitive function, recapitulating post-COVID-19 syndrome. We also show that neuroinflammation and hippocampal microgliosis mediate Spike-induced memory dysfunction via complement-dependent engulfment of synapses. Genetic or pharmacological blockage of Toll-like receptor 4 (TLR4) signaling protects animals against synapse elimination and memory dysfunction induced by Spike brain infusion. Accordingly, in a cohort of 86 patients who recovered from mild COVID-19, the genotype GG TLR4-2604G>A (rs10759931) is associated with poor cognitive outcome. These results identify TLR4 as a key target to investigate the long-term cognitive dysfunction after COVID-19 infection in humans and rodents.

## INTRODUCTION

Severe acute respiratory syndrome coronavirus 2 (SARS-CoV-2) is considered a respiratory pathogen, but the impact of the infection on extrapulmonary tissues is of high concern.<sup>1</sup> Coronavirus disease 2019 (COVID-19) is associated with unpredictable and variable outcomes, and while most patients show a positive recovery after the acute stages,<sup>2</sup> others experience a myriad of acute<sup>2</sup> and long-term dysfunctions.<sup>3,4</sup> Cognitive impairment is a well-characterized feature of post-COVID-19 syndrome, even in patients with mild symptoms, referred to as “long COVID-19 or post-COVID-19.”<sup>5–8</sup> Mounting evidence suggests that

COVID-19-induced neurological symptoms are mediated by multiple events, including direct brain viral infection, brain hypoxia, and/or systemic inflammation,<sup>9–13</sup> but the central mechanism is still unclear.

SARS-CoV-2 Spike protein plays a pivotal role in COVID-19 pathogenesis and is the main target for vaccine development. Spike protein forms a homotrimer on the virus surface that is cleaved into two fragments, S1 and S2, after virus binding to its cellular receptor, angiotensin-converting enzyme 2 (ACE2).<sup>14</sup> The S1 fragment contains the binding to ACE2, while the S2 fragment mediates cellular entry through fusion between the viral and cellular membranes. There is evidence suggesting

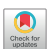

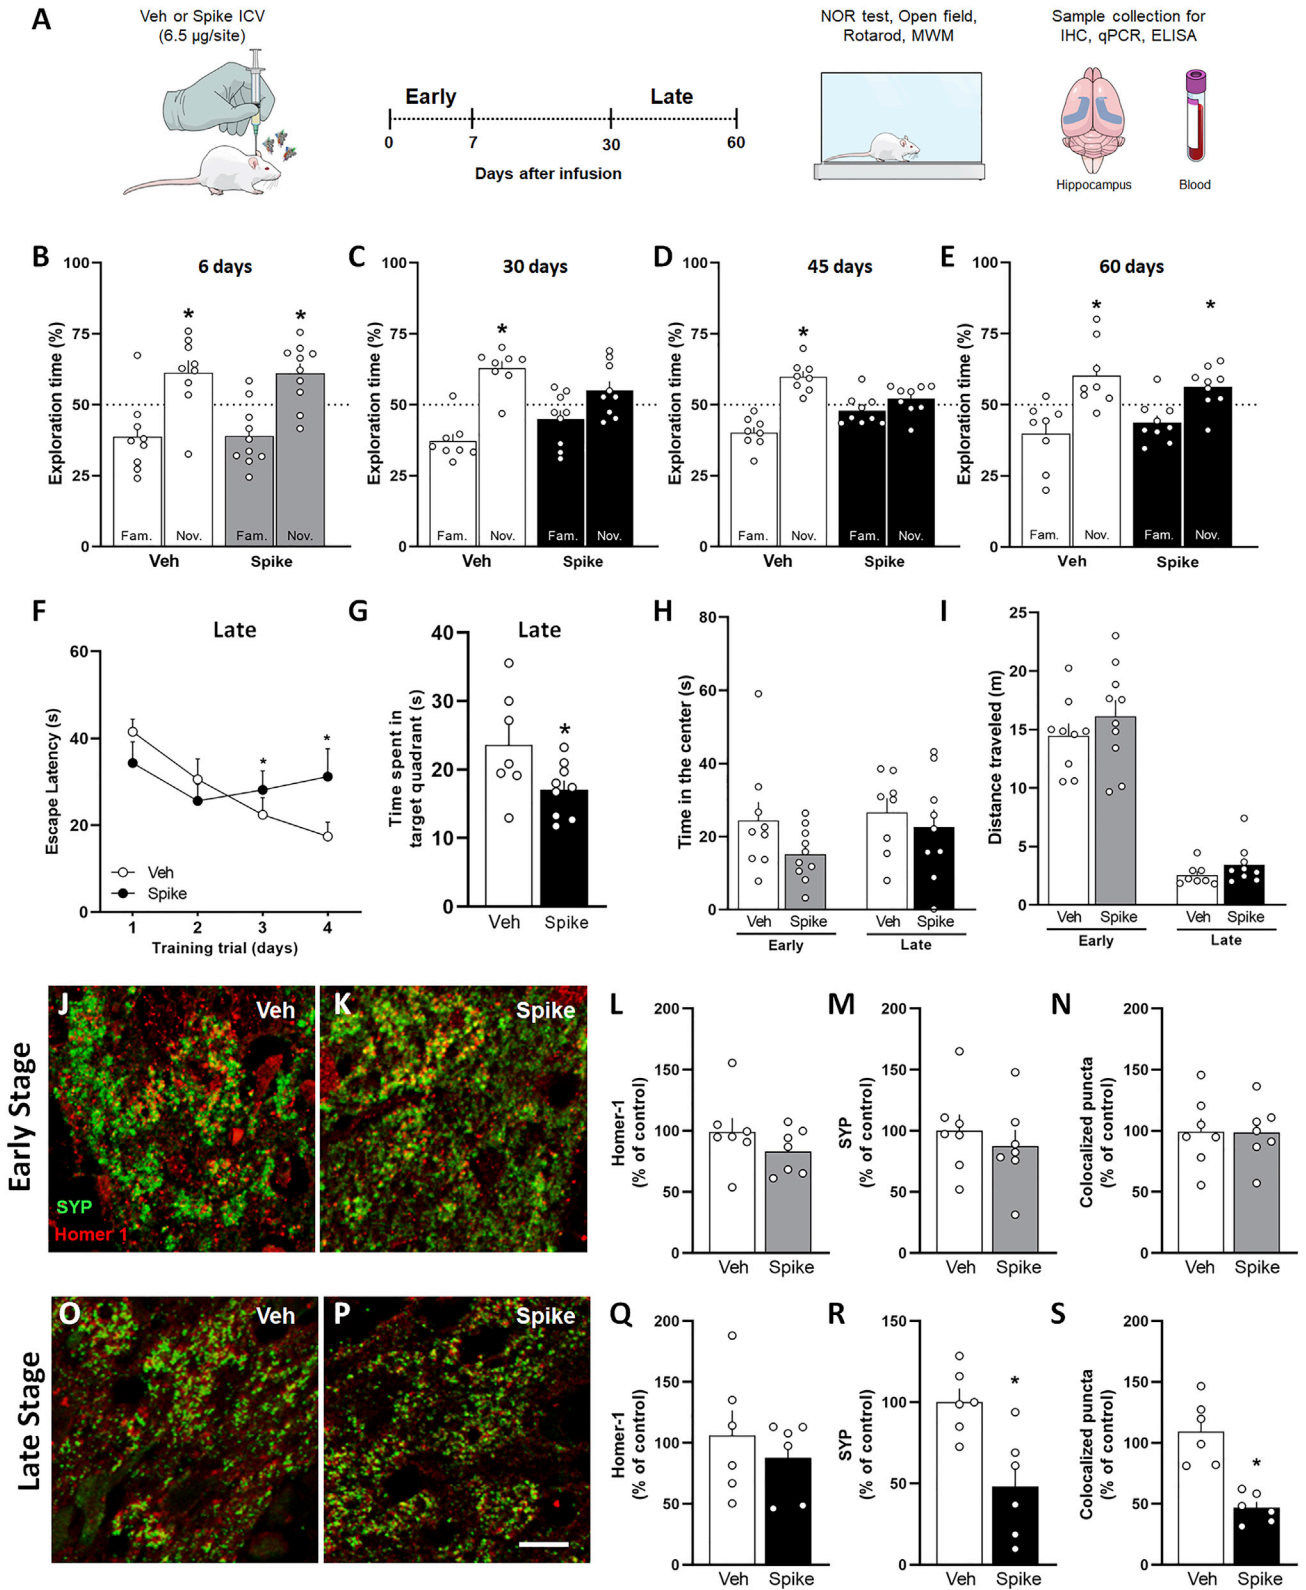

(legend on next page)

that, during SARS-CoV-2 infection, Spike protein or its S1 fragment is released from the cells, reaching different tissues, including the central nervous system (CNS), irrespective of the presence of the viral RNA.<sup>15,16</sup> Additionally, it has been demonstrated that cells expressing the Spike protein release extracellular vesicles containing the full-length protein,<sup>17</sup> which would be another means of its circulation in the body. Free S1 has been shown to cross the blood-brain barrier (BBB), reaching different memory-related regions of the brain, suggesting that the protein itself, independent of the viral particles, would affect brain functions.<sup>18</sup> Notably, Swank et al.<sup>19</sup> detected high levels of circulating Spike protein several months after SARS-CoV-2 infection in patients diagnosed with post-COVID-19 but not in individuals who did not present long-term sequelae. Nevertheless, whether the presence of the Spike protein in the brain is a crucial event for development of cognitive impairment in patients with post-COVID-19 as well as its underlying mechanisms remain poorly known.

Toll-like receptors (TLRs) are activated by different pathogen-associated molecular patterns (PAMPs) and are crucial for evoking the innate immune response to infection, stress, or injury.<sup>20</sup> Studies have predicted that SARS-CoV-2 Spike protein binds to TLR4 with higher affinity than to ACE2,<sup>21,22</sup> and its aberrant signaling is involved in the hyperinflammatory response of patients with COVID-19.<sup>23</sup> *In vitro* studies also demonstrated that SARS-CoV-2 Spike protein activates TLR4 in cultured phagocytic cells, stimulating production of proinflammatory mediators.<sup>24–26</sup> Although TLR4 has already been implicated in microglial activation and cognitive dysfunction of Alzheimer's disease,<sup>27</sup> the impact of TLR4 signaling in COVID-19-related neurological dysfunction is still unknown.

Most experimental studies investigating the effects of SARS-CoV-2 Spike protein on the brain have focused on acute infection.<sup>24,25,28–31</sup> Also, few studies have used experimental models to evaluate the possible mechanism of post-COVID-19 syndrome.<sup>32,33</sup> Here, we developed a mouse model of intracerebroventricular (i.c.v.) infusion of Spike to understand the role of this protein in late cognitive impairment after viral infection. We infused Spike protein into mouse brains and demonstrated late

cognitive impairment, synapse loss, and microglial engulfment of presynaptic terminals. Early TLR4 blockage prevented Spike-associated detrimental effects on synapse and memory. We also demonstrated that the *TLR4* SNP rs10759931 is associated with long-term cognitive impairment in patients who recovered from mild COVID-19. Collectively, these findings show that Spike protein impacts the mouse CNS, independent of virus infection, and identify TLR4 as a key mediator and interesting target to investigate long-term cognitive dysfunction in humans and rodents.

## RESULTS

### Brain exposure to SARS-CoV-2 Spike protein induces late cognitive impairment and synapse loss in mice

COVID-19 is associated with late cognitive dysfunction.<sup>5</sup> To evaluate whether brain exposure to SARS-CoV-2 Spike protein affects cognitive function independent of systemic inflammation, we infused the recombinant protein directly into mouse brains (i.c.v. infusion) and followed behavioral changes in two different time frames, “early and “late” phases, corresponding to assessments performed within the first 7 days and from 30–60 days after Spike protein infusion, respectively (Figure 1A). The choice of these time points was based on the observations that the acute phase of COVID-19<sup>34</sup> comprises a few days or weeks, and late sequelae initiate between 3 and 4 weeks from the onset of acute disease.<sup>35</sup> In addition, these time points were similar to those used in our previous studies evaluating long-term cognitive dysfunctions observed in sepsis or Zika virus infection.<sup>36</sup> We assessed mouse memory function using the novel object recognition (NOR) test. While vehicle (Veh)-infused mice were able to perform the NOR task, as demonstrated by longer exploration of the novel object over the familiar one (Figures 1B–1E, white bars), mice infused with Spike failed to recognize the novel object when evaluated between 30 and 45 days after injection (Figures 1C and 1D, black bar). Remarkably, memory dysfunction is a late outcome of brain exposure to Spike protein; at the early time point (7 days after infusion), the animals were still able to perform the NOR task (Figure 1B, gray bar). Of note,

#### Figure 1. Spike protein causes synapse damage and memory impairment in mice

(A) Mice received an i.c.v. infusion of 6.5 μg of SARS-CoV-2 Spike protein (Spike) or vehicle (Veh) and were evaluated at early (up to 7 days) or late time points (from 30–60 days) after infusion using behavioral and molecular approaches.

(B–E) Mice were tested in the NOR test at 6 days (B;  $t = 2.626$ ,  $^*p = 0.0304$  for Veh;  $t = 3.218$ ,  $^*p = 0.0105$  for Spike), 30 days (C;  $t = 5.099$ ,  $^*p = 0.0014$  for Veh;  $t = 1.645$ ,  $p = 0.1386$  for Spike), 45 days (D;  $t = 5.122$ ,  $^*p = 0.0014$  for Veh;  $t = 1.189$ ,  $p = 0.2685$  for Spike), or 60 days (E;  $t = 2.913$ ,  $^*p = 0.0195$  for Veh;  $t = 2.560$ ,  $^*p = 0.0336$  for Spike). One-sample Student's *t* test compared with the chance level of 50% ( $n = 8–10$  mice per group).

(F and G) Escape latency across 4 consecutive training trials (F) and time spent in the target quadrant during the probe trial (G) of the MWM test performed 45 days after Spike infusion (F,  $F_{(3, 45)} = 2.857$ ,  $^*p = 0.0475$ , repeated measures ANOVA followed by Tukey's test G,  $t = 2.211$ ,  $^*p = 0.0442$ , Student's *t* test;  $n = 7–9$  mice per group).

(H) Time spent at the center of the open field arena at early or late stages of the model (early,  $t = 1.728$ ,  $p = 0.1021$ ; late,  $t = 0.5363$ ,  $p = 0.5348$ ; Student's *t* test;  $n = 8–10$  mice per group).

(I) Total distance traveled in the open field arena at early or late stages of the model (early,  $t = 0.9614$ ,  $p = 0.3498$ ; late,  $t = 1.343$ ,  $p = 0.1993$ ; Student's *t* test;  $n = 8–10$  mice per group).

(J, K, O, and P) Representative images of the DG hippocampal region of Veh-infused (J and O) and Spike-infused mice (K and P) in the early (J and K) and late (O and P) stages of the model, immunolabeled for Homer-1 (red) and synaptophysin (SYP; green).

(L–N and Q–S) Number of puncta for Homer-1 (L and Q), SYP (M and R), and colocalized Homer-1/SYP puncta (N and S) in the early (L–N) and late (Q–S) stages of the model. (L,  $t = 1.202$ ,  $p = 0.2524$ ; M,  $t = 0.6648$ ,  $p = 0.5188$ ; N,  $t = 0.04952$ ,  $p = 0.9613$ ; Q,  $t = 0.7491$ ,  $p = 0.4711$ ; R,  $t = 3.400$ ,  $^*p = 0.0273$ ; S,  $t = 4.204$ ,  $^*p = 0.0137$ ; Student's *t* test;  $n = 6–7$  mice per group).

Scale bar, 20 μm. Symbols represent individual mice. Bars or points represent mean ± SEM. IHC, immunohistochemistry; MWM, Morris water maze; NOR, novel object recognition.

performance of i.c.v. Spike protein-infused mice in the NOR test returned to normal 60 days after infusion (Figure 1E), showing that memory impairment is reversible. An i.c.v. administration of a 10-fold lower protein amount (0.65  $\mu\text{g}$ ) had no impact on memory function in the early and later phase of the model (Figures S1A and S1B). Although the main access route of the virus and its products to the CNS is still under debate,<sup>13,37–41</sup> they may reach the brain from the periphery. Thus, to mimic this possible route by which the protein reaches the CNS, we assessed mouse memory function after subcutaneous (s.c.) Spike protein infusion. The results were similar to those obtained with i.c.v. injected mice, with cognitive dysfunction occurring only at later time points following protein infusion (Figures S1C and S1D).

Late cognitive dysfunction induced by Spike protein infusion was confirmed by the Morris water maze (MWM) test, a task widely used to assess spatial memory in rodents.<sup>42</sup> Mice infused with Spike protein showed higher latency time to find the submerged platform in sessions 3 and 4 of MWM training compared with control mice (Figure 1F). Also, Spike protein-infused mice showed reduced memory retention, as indicated by the decreased time spent by these animals in the target quadrant during the probe trial (Figure 1G). To rule out the possibility that changes in motivation or motor function eventually induced by Spike protein infusion were influencing NOR or MWM interpretation, mice were also submitted to the open field and rotarod tests. The Spike protein- and Veh-infused groups showed a similar innate preference for the objects in the NOR memory test (Figures S1E, S1F, S1I, S1J, and S2A–S2D), showed similar motivation toward object exploration in the NOR sessions (Figures S1G, S1H, S1K, S1L, and S2E–S2H), and performed similarly in the open field (Figures 1H, 1I, and S1M–S1R) and rotarod (Figure S2I) tests. No differences in swimming speed (Figure S2J) or distance traveled (Figure S2K) were found between groups in the test session of the MWM task. We also found that Spike infusion had no impact on body weight or food intake of mice (Figure S1S, S1T, S2L, and S2M), suggesting that Spike-induced neuroinflammatory modulation is specific to cognitive function rather than to a broader sickness response.

Synapse loss is strongly correlated with the cognitive decline observed in neurodegenerative diseases.<sup>43,44</sup> Thus, we next investigated whether Spike protein induces synapse damage in the mouse hippocampus, a brain region critical for memory consolidation. Spike protein-infused mice did not show changes in synaptic density at the early stages, as demonstrated by the similar immunostaining for synaptophysin (SYP) and Homer-1 (pre- and postsynaptic markers, respectively) compared with the control group (Figures 1J–1N). Equivalent results were also found for colocalization of these synaptic markers, which indicates no changes in synaptic density (Figures 1J, 1K, and 1N). In contrast, decreased SYP immunostaining (Figures 1O, 1P, and 1R) and synaptic puncta (Figures 1O, 1P, and 1S) were observed in the late stage after protein infusion, indicating that Spike-induced hippocampal synapse damage displays temporal correlation with mouse behavioral phenotype (Figures 1C, 1D, 1F, and 1G). Using Fluoro-Jade staining, we found that Veh- and Spike-infused mouse hippocampal sections had no signal of degenerating neurons in the early and late phases of

the model (Figure S3), suggesting that synaptic loss occurs independent of neuronal death. Collectively, these data suggest that a single brain infusion of Spike protein induces late synaptic loss and cognitive dysfunction, mimicking the post-COVID-19 syndrome.<sup>5</sup>

### SARS-CoV-2 Spike protein triggers late neuroinflammation in mice

Neurodegeneration associated with viral brain infection can be mediated either by direct neuronal injury or by neuroinflammation.<sup>45</sup> To advance the understanding of the genuine impact of Spike protein on neurons, cultured primary cortical neurons were incubated with the protein for 24 h. Neuron exposure to Spike protein did not affect neuron morphology (Figures S4A–S4E) when the percentage of pyknotic nuclei (Figure S4C), number of primary neurites (Figure S4D), and intensity of  $\beta$ 3-tubulin immunostaining (Figure S4E) were similar for Veh- and Spike protein-incubated neurons. Also, Spike protein incubation had no effect on neuronal synaptic density and puncta (Figures S4F–S4J), suggesting that neurons are not directly affected by Spike protein.

Microglia is the primary innate immune cell of the brain and plays a critical role in neuroinflammation-induced cognitive dysfunction.<sup>46</sup> To further understand the impact of Spike protein on microglial activation, mouse microglia BV-2 cells were incubated with Spike protein for 24 h. We found that Spike protein stimulation increased ionized calcium binding adaptor molecule 1 (Iba-1; a macrophage/microglia marker) immunoreactivity (Figures S4K–S4M) and upregulated tumor necrosis factor (TNF), interferon  $\beta$  (IFN- $\beta$ ), and interleukin-6 (IL-6) expression (Figures S2N–S2P) without affecting IL-1 $\beta$  and IFNAR2 (Figures S4Q–S4R). To evaluate the time course of microglia activation *in vivo*, we analyzed cellular features and cytokine production in our mouse model. We found that, at the early stage, i.c.v. injection of Spike protein neither changed the number and morphology of microglia (Figures 2A–2D) nor increased the expression of TNF, IL-1 $\beta$ , IL-6, INF- $\beta$ , and IFNAR1 genes in hippocampal tissue (Figures 2E–2I). In contrast, the levels of IFNAR2 mRNA decreased significantly at the same time point after Spike protein infusion (Figure 2J).

We next investigated whether gliosis was induced by Spike protein. Mouse hippocampal sections obtained at the early and late stage after Spike infusion were immunolabeled for glial fibrillary acidic protein (GFAP, an astrocyte marker), ionized calcium binding adaptor molecule-1 (Iba-1), and transmembrane protein 119 (TMEM119, a microglia marker). No differences in GFAP immunoreactivity (Figures S5A–S5C and S5F–S5H) or morphology (Figures S5D, S5E, S5I, and S5J) were detected in Spike-infused mice compared with the control group. In contrast, assessments performed at the late time point revealed an increased number of Iba-1<sup>+</sup> cells (Figures 2K–2M) and a predominance of cells with amoeboid morphology in the hippocampus (Figures 2K, 2L, and 2N). Further indicating that late but not early (Figure S5K–S5M) microgliosis was induced by Spike protein, we found significantly higher TMEM119 immunoreactivity in the dentate gyrus (DG) hippocampal subregion of Spike-infused mice (Figures S5N–S5P). Notably, the mRNA levels of the inflammatory mediators TNF, IL-1 $\beta$ , IFN $\alpha$ , and

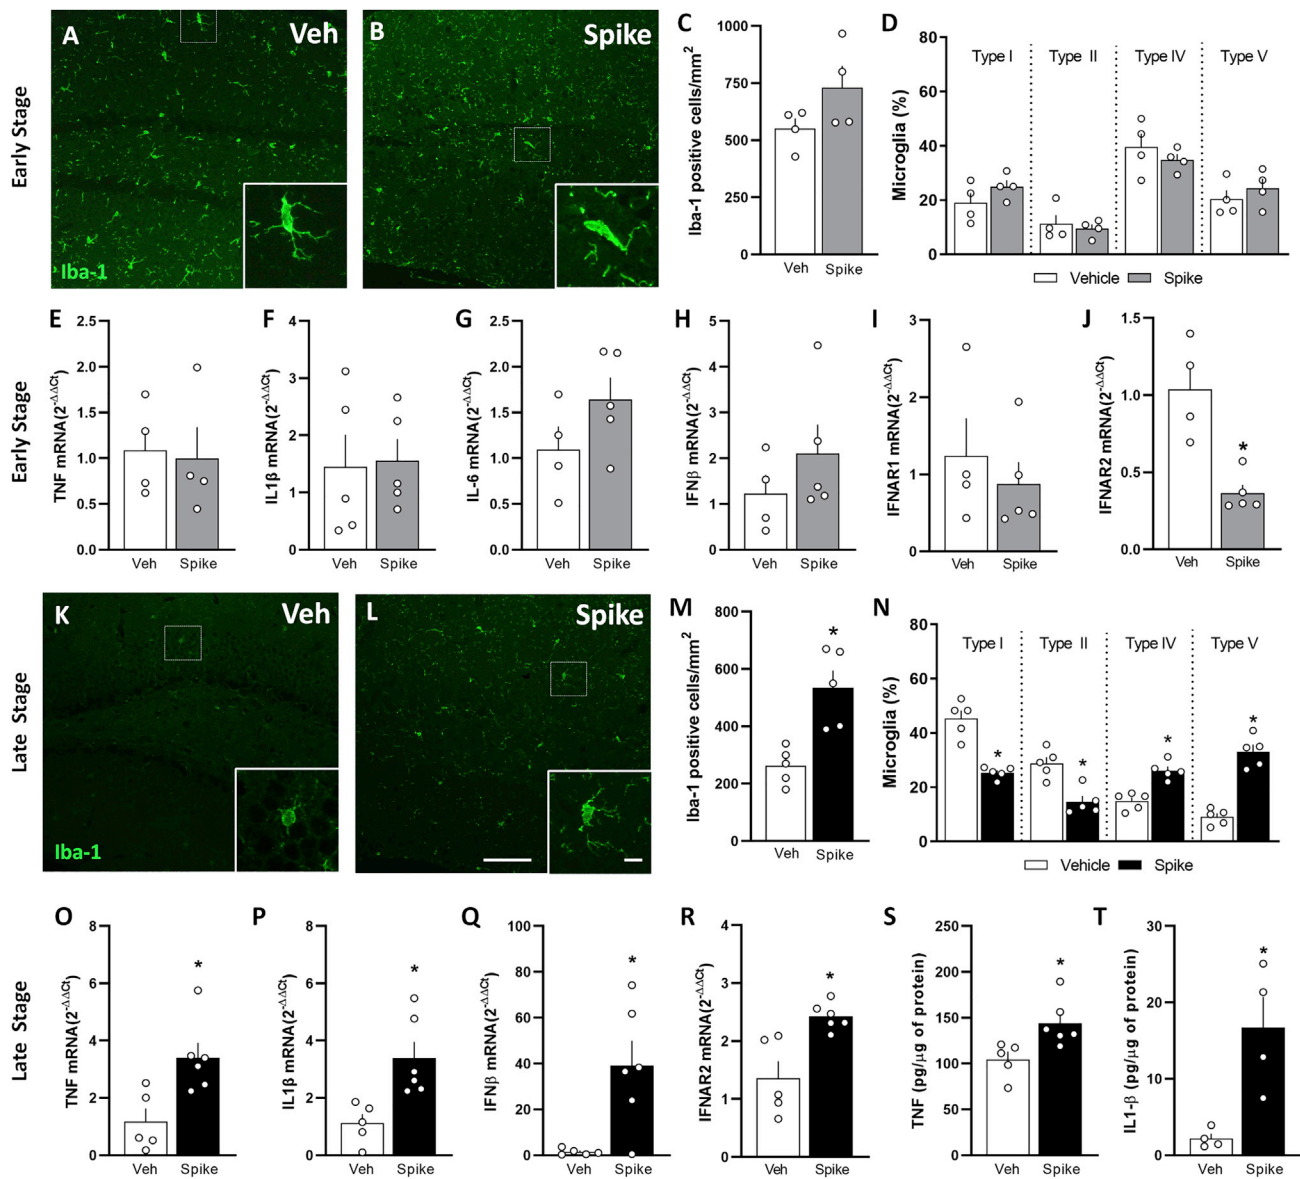

IFN $\beta$  (Figures 2O–2Q) as well as the IFN receptor IFNAR2 (Figure 2R) were higher in the hippocampus of Spike-infused mice at this late time point. The protein levels of TNF and IL-1 $\beta$  (Figures 2S and 2T) were also increased in the hippocampal tissue at the late stage of the model, corroborating the mRNA analysis. Hippocampal expression of IL-6 and IFN $\gamma$  cytokines and the receptor IFNAR1 were unaffected by Spike protein infusion (Figures S5Q–S5S). We also found increased serum levels of TNF only in the late stage of the model, which returned to control levels 60 days post infusion (Figures S5T–S5V), correlating with cognitive dysfunction (Figures 1B–1E). Altogether, our results indicate that the cognitive impairment induced by Spike protein is accompanied by microglial activation and neuroinflammation.

### SARS-CoV-2 Spike protein induces C1q-mediated synaptic phagocytosis by microglia in mice

Synaptic phagocytosis (or synaptic pruning) by microglia has been shown to underlie cognitive dysfunction in dementia and viral encephalitis.<sup>36,43,47</sup> We therefore evaluated whether synaptic phagocytosis by microglia mediates Spike protein-induced synapse damage. Hippocampal three-dimensional image reconstructions of Iba-1<sup>+</sup> cells from Spike protein-infused mice showed increased SYP<sup>+</sup> terminals inside phagocytic cells (Figures 3A–3D). Complement component 1q (C1q) is known to be involved in the initial tagging of synapses, preceding synaptic engulfment by microglial cells.<sup>48</sup> Accordingly, we found that C1q was significantly upregulated in the hippocampus of mice late (but not early) after Spike protein infusion (Figures 3E and 3F). This finding led us to investigate whether blockage of soluble C1q could restore cognitive function in Spike protein-infused mice. For this, the animals were treated by i.c.v. route with a neutralizing anti-C1q antibody immediately after Spike protein infusion and twice a week for 30 days, and the animals were evaluated in the NOR and MWM tasks (Figure 3G). Remarkably, C1q blockage rescued object recognition memory impairment in Spike protein-infused mice (Figure 3H) without any effect on locomotion (Figure 3I) or exploration (Figures S6A and S6B). Similarly, neutralizing C1q antibody treatment also prevented spatial memory dysfunction induced by Spike protein infusion (Figures S6C and S6D), with no changes in the swimming speed (Figure S6E) or distance traveled (Figure S6F) between groups during the MWM test session. We found that C1q blockage also prevented the late decrease in hippocampal synaptic puncta (Figures 3J–3N) and reduced microglial synaptic engulfment (Figures 3O–3R) in mice infused with the Spike protein. Together, these data suggest that C1q-mediated microglial phagocytosis underlies long-term cognitive dysfunction induced by Spike protein, as seen for viral encephalitis.

### TLR-4 mediates cognitive dysfunction induced by SARS-CoV-2 Spike protein

Studies have described that Spike protein induces TLR4 activation in cultured immune cells.<sup>24–26,29</sup> Additionally, TLR4 has been implicated in microglial activation and cognitive dysfunction in degenerative chronic diseases of the CNS, such as Alzheimer's disease.<sup>49</sup> In agreement with these observations, despite no changes in TLR4 expression levels at the early time point after Spike protein infusion (Figure 4A), we found late upregulation

of the TLR4 gene (Figure 4B) in the hippocampus of Spike protein-infused mice that matches the late cognitive dysfunction (Figures 1C, 1D, 1F, and 1G). To evaluate the role of TLR4 in Spike-induced cognitive impairment, we used either a pharmacological approach or a TLR4 knockout mouse model (*TLR4*<sup>−/−</sup>). First, to investigate whether activation of TLR4 is an early event that could impact cognition later on, mice were treated with the TLR4 inhibitor TAK242 1 h before Spike protein brain infusion and once a day for 7 days (Figure 4C). Remarkably, early inhibition of TLR4 greatly prevented late memory dysfunction induced by Spike protein (Figure 4D). Some evidence has shown that high plasmatic levels of neurofilament light chain (NFL) are correlated with poor outcome in patients with COVID-19.<sup>50–54</sup> Thus, we evaluated the NFL levels in plasma samples of control and Spike protein-infused mice treated or not with TAK242. Like patients with COVID-19, Spike-infused animals presented high serum levels of NFL compared with Veh-infused mice, which was prevented by TAK242 treatment (Figure 4E). Experiments using knockout mice confirmed those using the pharmacological approach. In the early phase after Spike protein infusion, wild-type (WT) and *TLR4*<sup>−/−</sup> mice learned the NOR task (Figure S6G). On the other hand, at a late time point after protein infusion, WT mice had poor performance in the NOR test, while *TLR4*<sup>−/−</sup> animals were able to execute the task (Figure 4F). Also, the absence of TLR4-mediated response in *TLR4*<sup>−/−</sup> mice prevented the reduction of SYP<sup>+</sup> terminals inside phagocytic cells later after Spike protein infusion in comparison with WT mice (Figures 4G–4K). Consistent with the previous results, control experiments showed that genetic (Figures S6G–S6M) or pharmacological (Figures S6N–S6P) inhibition of TLR4 had no effect on locomotion or exploratory behavior. Finally, we also found reduced numbers and altered morphology of microglia cells (Figures 4L–4O) as well as fewer microglia-engulfed synapses in the hippocampus of *TLR4*<sup>−/−</sup> mice later after Spike protein brain infusion (Figures 4P–4S). Together, these data suggest that TLR4 activation mediates cognitive deficits and synaptic pruning induced by Spike protein in mice. Importantly, early treatment with the TLR4 inhibitor prevented late neuronal damage, indicating that the TLR4 pathway is central to induce neurodegeneration and long-term cognitive impairment in the present model.

### A SNP in the *TLR4* gene is associated with increased risk of cognitive dysfunction after COVID-19

Several lines of evidence have suggested that polymorphisms in the *TLR4* gene are a risk factor for developing inflammatory diseases, including sporadic Alzheimer's disease.<sup>49,55–57</sup> Thus, we sought to extend our findings by investigating whether there is an association between *TLR4* gene variants and cognitive outcomes in patients with COVID-19. For this, 86 individuals with a confirmed COVID-19 diagnosis, mostly with mild disease, were included in the study sample (Figures 4T). Characteristics of the sample are displayed in Table S1. Cognition was assessed using the symbol digit modalities test (SDMT) from 1–15 months after onset of acute COVID-19 symptoms (with cognitive deficit mean, 5.88 months; without cognitive deficit mean, 5.9 months). Of interest, nearly half of the patients evaluated (40, 46.51%) presented an important degree of post-COVID-19 cognitive

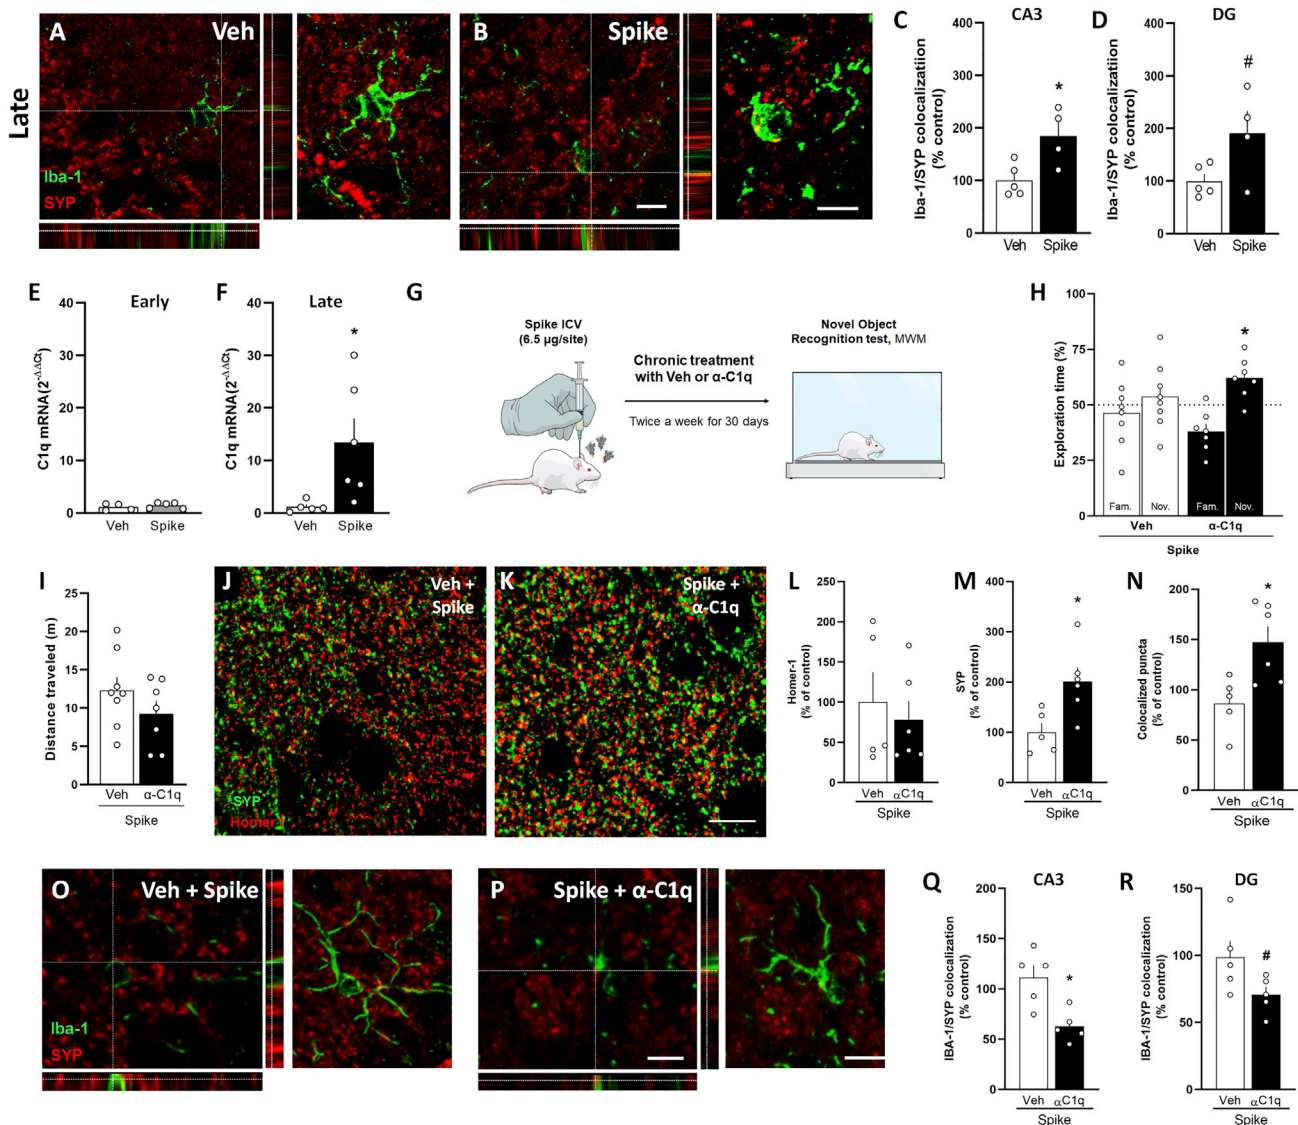

**Figure 3. C1q neutralization prevents Spike-induced memory impairment in mice**

Mice received an i.c.v. infusion of 6.5 µg of SARS-CoV-2 Spike protein (Spike) or Veh, and were evaluated at early (3 days) or late time points (45 days). (A and B) Representative images of microglia (Iba-1<sup>+</sup>, green) engulfing pre-synaptic terminals immunolabeled for SYP (red) in the DG hippocampal subregion of Veh-infused (A) or Spike-infused mice (B) in the late stage of the model. Scale bar, 25 µm; inset scale bar, 10 µm. (C and D) Quantification of microglia-SYP colocalization in CA3 (C;  $t = 2.949$ ,  $*p = 0.0214$ ) and DG (D;  $t = 2.271$ ,  $\#p = 0.0574$ ) hippocampal subregions. Student's  $t$  test;  $n = 4$ –5 mice per group. (E and F) C1q mRNA expression in hippocampi of Veh- or Spike-infused mice at early (E;  $t = 0.7877$ ,  $p = 0.4567$ ) or late (F;  $t = 2.425$ ,  $*p = 0.0383$ ) time points. Student's  $t$  test;  $n = 4$ –6 mice per group. (G) Mice received an i.c.v. infusion of 6.5 µg of Spike, were treated with Veh or 0.3 µg anti-C1q antibody ( $\alpha$ -C1q; i.c.v., twice a week for 30 days), followed by the NOR test (H;  $t = 3.438$ ,  $*p = 0.0138$  for Spike/ $\alpha$ -C1q). One-sample Student's  $t$  test compared with the chance level of 50%;  $n = 7$ –8 mice per group. (I) Total distance traveled in the open field arena at the late time point ( $t = 1.274$ ,  $p = 0.2249$ ). Student's  $t$  test;  $n = 7$ –8 mice per group. (J and K) Representative images of the DG hippocampal subregion of Veh/Spike-injected (J) or  $\alpha$ -C1q/Spike-injected (K) mice immunolabeled for Homer1 (red) and SYP (green). Scale bar, 20 µm. Number of puncta for Homer-1 (L;  $t = 0.5215$ ,  $p = 0.6146$ ), SYP (M;  $t = 2.881$ ,  $p = 0.0181$ ) and colocalized Homer-1/SYP puncta (N;  $t = 2.935$ ,  $p = 0.0166$ ). Student's  $t$  test;  $n = 5$ –6 mice per group. (O and P) Representative images of microglia (Iba-1<sup>+</sup>, green) engulfing pre-synaptic terminals immunolabeled for SYP (red) in the DG hippocampal subregion of Veh/Spike (O) or  $\alpha$ -C1q/Spike mice (P) in the late stage of the model. Scale bar, 10 µm. (Q and R) Quantification of microglia-SYP colocalization in the CA3 (Q;  $t = 3.454$ ,  $*p = 0.0086$ ) and DG (R;  $t = 2.052$ ,  $\#p = 0.0743$ ) hippocampal subregions. Student's  $t$  test;  $n = 5$  mice per group. Symbols represent individual mice, and bars represent mean  $\pm$  SEM.



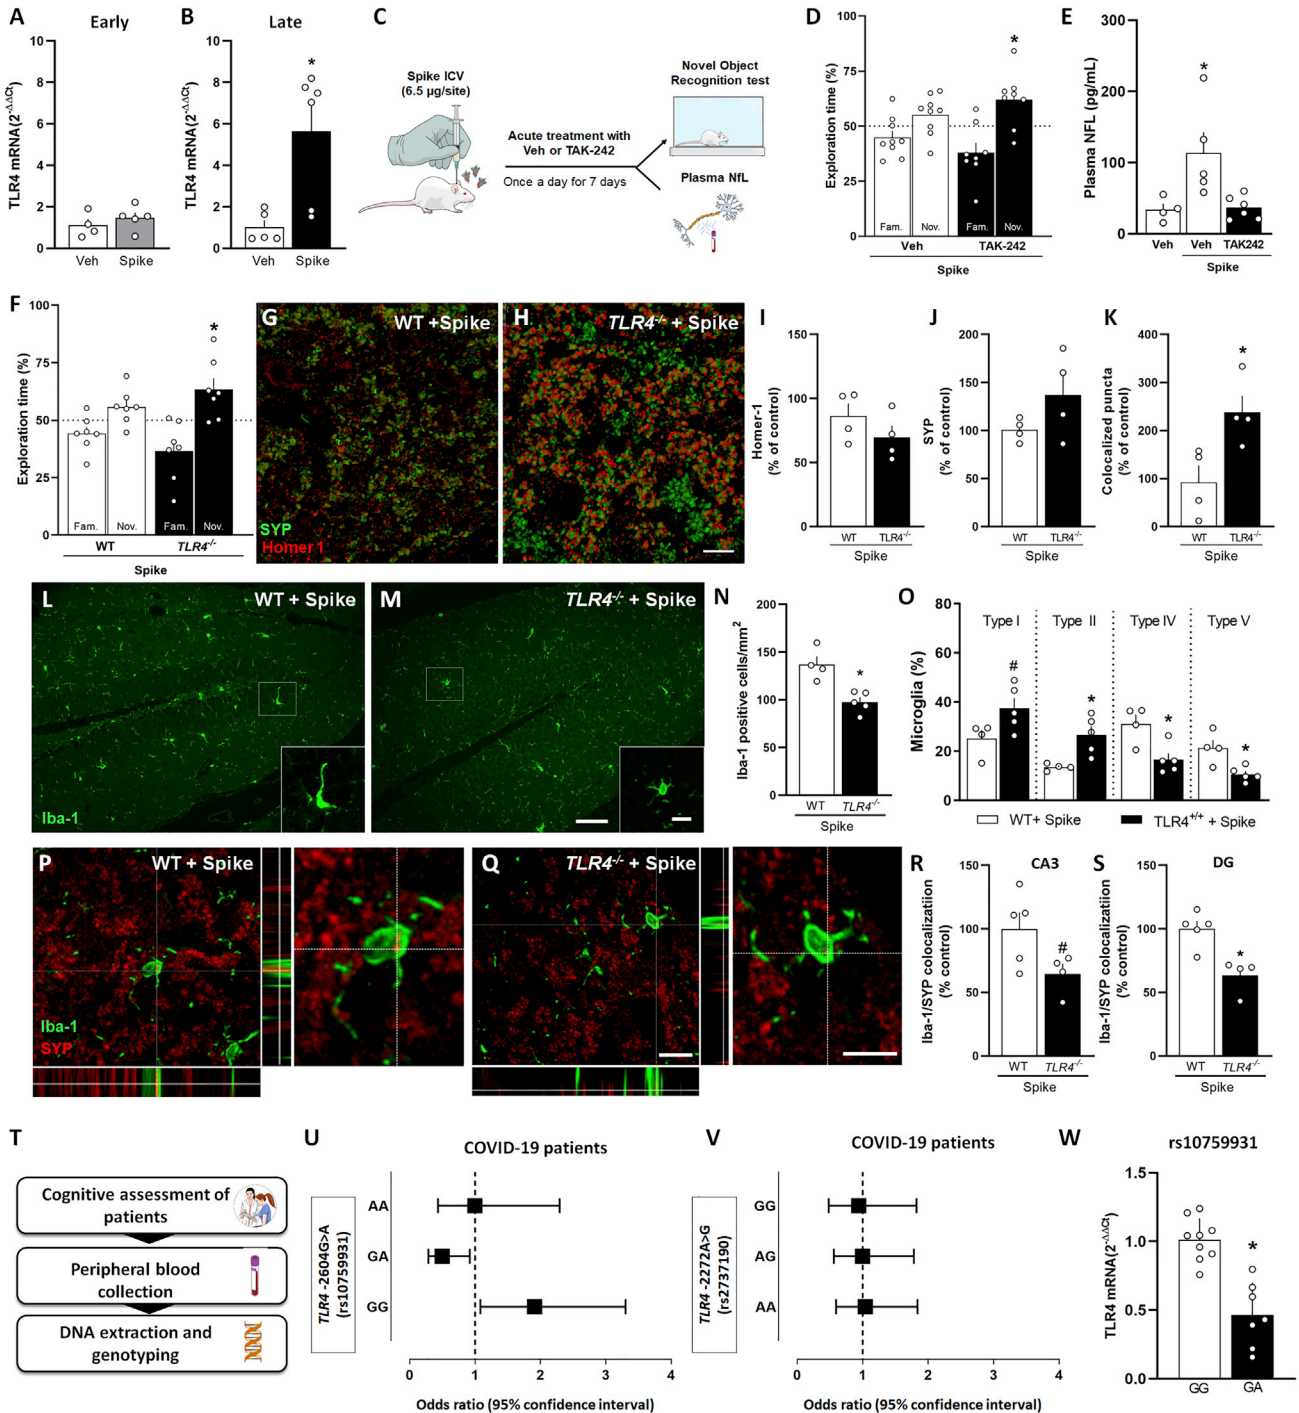

**Figure 4. TLR4 mediates Spike-induced memory impairment in mice and is associated with post-COVID-19 cognitive impairment in a human cohort**

(A and B) Mice received an i.c.v. infusion of 6.5  $\mu$ g of SARS-CoV-2 Spike or Veh, and TLR4 mRNA levels in the hippocampi of Veh- or Spike-infused mice were evaluated at early (A; 3 days,  $t = 0.8892$ ,  $p = 0.4034$ , Student's  $t$  test) or late (B; 45 days,  $*p = 0.0303$ , Mann-Whitney U test) time points ( $n = 4-6$  mice per group). (C) Swiss mice received an i.c.v. infusion of 6.5  $\mu$ g of Spike, were treated with Veh or the TLR4 antagonist TAK-242 (2 mg/kg, intraperitoneal [i.p.], once daily for 7 days), and were tested in the late stage of the model in the NOR test (D;  $t = 2.713$ ,  $*p = 0.0301$  for Spike/TAK-242). One-sample Student's  $t$  test compared with the chance level of 50%;  $n = 8-9$  mice per group.

(E) Plasma NFL levels evaluated in the late stage of the Spike infusion model ( $F = 6.329$ ,  $*p = 0.0133$ ). One-way ANOVA test followed by Tukey's test,  $n = 4-6$  mice per group.

(legend continued on next page)

impairment (Table 1). Genotyping analysis for two different SNPs (rs10759931 and rs2737190) was performed in all studied subjects. We found that genotypic distributions were in Hardy-Weinberg equilibrium and had no linkage disequilibrium (LD) between the two TLR4 SNPs ( $D' > 0.9$ ). Individuals carrying the *TLR4*-2604G>A (rs10759931) GG homozygous genotype demonstrated a significantly higher risk for developing cognitive impairment following SARS-CoV-2 infection ( $p = 0.0234$ , odds ratio [OR] = 1.91), while the GA genotype was associated with a decreased risk ( $p = 0.0209$ , OR = 0.50) (Figure 4U; Table 1). Test time was included as a covariate in the logistic regression analyses ( $p$  adjusted = 0.0129\*) (Table 1). Conversely, none of the *TLR4*-2272A>G (rs2737190) genotype variations were associated with increased susceptibility to post-COVID-19 cognitive impairments (Figures 4V; Table 1). Considering our clinical findings demonstrating that the SNP (rs10759931) is associated with poor cognitive function after COVID-19, we performed functional analysis aiming to strengthen the link between this genetic variant and the levels of TLR4 mRNA after Spike stimulation. Spike stimulation of cultured GG genotype cells resulted in increased levels of mRNA TLR4 compared with GA genotype cells ( $*p = <0.0001$ ) (Figure 4X). Our findings suggest that polymorphisms in the TLR4 gene are associated with altered Spike-induced host immune responses, increasing the risk of developing long-term cognitive deficits in genetically susceptible individuals.

## DISCUSSION

Post-COVID-19 syndrome comprises a myriad of symptoms that emerge after the acute phase of infection, including psychiatric symptoms and dementia-like cognitive dysfunction.<sup>5,58–60</sup> Clinical studies have largely mapped the spectrum of neurological symptoms in patients with post-COVID-19 syndrome but do not provide a significant advance by describing the molecular mechanisms that trigger this condition or targets for preven-

tive/therapeutic interventions. On the other hand, studies involving COVID-19 preclinical models have focused mostly on the acute impacts of viral infection. Therefore, it is mandatory to develop novel tools to dissect the mechanisms underlying the neurological deficits in post-COVID-19 syndrome, especially the direct effects of the virus and/or viral products on the brain.

Here we speculated that Spike protein plays a central role in neurological dysfunction associated with post-COVID-19 syndrome, independent of SARS-CoV-2 replication in the brain. Notably, our hypothesis is supported by recent findings showing that Spike protein persists in the plasma of patients with long COVID-19 for up to 12 months post diagnosis,<sup>19</sup> increasing the probability that it reaches the brain. Previous studies have demonstrated that the hippocampus is particularly vulnerable to viral infection.<sup>36,47,61</sup> Accordingly, brain scans of patients who recovered from COVID-19 showed significant changes in hippocampal volume<sup>62,63</sup> and hypometabolism;<sup>64</sup> both factors are important predictors of cognitive dysfunction in normal aging and Alzheimer's disease.<sup>65–67</sup> Using two hippocampus-dependent behavioral paradigms, we found that brain exposure to Spike protein induces reversible late-onset neuroinflammation and memory dysfunction. Thus, our model recapitulates not only long-term cognitive impairment but also recovery of memory function seen in long COVID-19 syndrome, expanding previous studies that were focused on the short-term effects of S1 exposure.<sup>24,68,69</sup> In contrast to our findings, in these studies, acute neuroinflammation and cognitive impairment were observed, which could be explained by the fact that the protein was infused directly into the hippocampal tissue<sup>69</sup> or by their use of aged mice.<sup>68</sup> We also cannot rule out that the trimeric ectodomain used in our model may induce later effects than those resulting from direct exposure to the S1 fragment.

Synapse damage is a common denominator in a number of memory-related diseases,<sup>70,71</sup> often preceding neurodegeneration. It has been shown that neuroinvasive viruses, such as West Nile virus (WNV), Borna disease virus (BDV), and Zika virus

(F) Wild-type (WT) and TLR4 knockout (*TLR4*<sup>-/-</sup>) mice received an i.c.v. infusion of 6.5  $\mu$ g of SARS-CoV-2 Spike and were tested in the NOR test in the late stage of the model (F;  $t = 2.033$ ,  $p = 0.0883$  for WT/Spike and  $t = 2.744$ ,  $*p = 0.0336$  for *TLR4*<sup>-/-</sup>/Spike). One-sample Student's  $t$  test compared with the chance level of 50%,  $n = 7$  mice per group.

(G and H) Representative images of the DG hippocampal region of WT/Spike (G) and *TLR4*<sup>-/-</sup>/Spike (H) mice immunolabeled for Homer1 (red) and SYP (green). Scale bar, 20  $\mu$ m.

(I–K) Number of puncta for Homer-1 (I;  $t = 1.272$ ,  $p = 0.2506$ ) and SYP (J;  $t = 1.592$ ,  $p = 0.1624$ ) and colocalized Homer-1/SYP puncta (K;  $t = 2.945$ ,  $*p = 0.0258$ ). Student's  $t$  test;  $n = 4$  mice per group.

(L and M) Representative images of Iba-1 immunolabeling in the DG hippocampal subregion of WT (L) and *TLR4*<sup>-/-</sup> (M) mice infused with Spike. Scale bar, 25  $\mu$ m; inset scale bar, 10  $\mu$ m.

(N) Iba-1<sup>+</sup> cells in the DG ( $t = 5.088$ ,  $*p = 0.0014$ ) hippocampal subregion of WT or *TLR4*<sup>-/-</sup> mice infused with Spike.

(O) Quantification of the different morphological types of Iba-1<sup>+</sup> cells in the hippocampus of Spike-infused WT and *TLR4*<sup>-/-</sup> mice (O;  $t = 2.229$ ,  $\#p = 0.0611$  for type I;  $t = 3.340$ ,  $*p = 0.0124$  for type II;  $t = 3.277$ ,  $*p = 0.0135$  for type IV;  $t = 3.316$ ,  $*p = 0.0128$  for type V). Student's  $t$  test,  $n = 4$ –5 mice per group. Type I and type II cells have smaller somata and fewer than 5 thin branches, surveillant microglia. Type III, IV, and V cells have more than 4 branches, thicker branches, and bigger somata, reactive microglia.

(P and Q) Representative images of microglia (Iba-1<sup>+</sup>, green) engulfing pre-synaptic terminals immunolabeled for SYP (red) in the DG hippocampal subregion of WT (P) and *TLR4*<sup>-/-</sup> (Q) mice infused with Spike. Scale bar, 50  $\mu$ m; inset scale bar, 10  $\mu$ m.

(R and S) Quantification of microglia-SYP colocalization in the CA3 (R;  $t = 2.200$ ,  $\#p = 0.0637$ ) and DG (S;  $t = 4.012$ ,  $*p = 0.0051$ ) hippocampal subregions. Student's  $t$  test;  $n = 4$ –5 mice per group. Symbols represent individual mice, and bars represent mean  $\pm$  SEM.

(T) Pipeline to analyze the impact of *TLR4* variants on the cognitive status of patients with post-COVID-19 syndrome.

(U and V) Forest plots showing the OR and 95% confidence interval for risk of cognitive impairment post COVID-19 by genotype for SNPs *TLR4* - 2604G>A (U, rs10759931) and *TLR4*-2272A>G (V, rs2737190). Each square represents the OR for each genotype, and each horizontal line shows the 95% confidence interval. (W) The expression levels of TLR4 for genotypes of SNP *TLR4*-2604G>A (rs10759931) was determined from peripheral blood mononuclear cells (PBMCs) treated with 1  $\mu$ g of Spike protein for 24 h ( $t = 5.612$ ,  $*p < 0.0001$ ). Student's  $t$  test;  $n = 7$ –8 patients per group. Data represents the mean  $\pm$  SD.

**Table 1. TLR4 rs10759931 and rs2737190 genotype distribution in patients with or without cognitive deficit following COVID-19**

| TLR4-2604G>A<br>(rs10759931)  | N (86) | Cognitive deficit (%) | No cognitive deficit (%) | p value | OR (95% CI)        | Adjusted p value<br>for SDMT time |
|-------------------------------|--------|-----------------------|--------------------------|---------|--------------------|-----------------------------------|
| GG                            | 40     | 22 (55)               | 18 (39)                  | 0.0234* | 1.91 (1.083–3.301) | 0.0129*                           |
| GA                            | 35     | 13 (32)               | 22 (48)                  | 0.0209* | 0.50 (0.287–0.920) |                                   |
| AA                            | 11     | 5 (13)                | 6 (13)                   | >0.9999 | 1.00 (0.435–2.294) |                                   |
| MAF (A)                       | 0.35   | –                     | –                        | –       | –                  |                                   |
| TLR4 -2272 A>G<br>(rs2737190) | N (83) | Cognitive deficit (%) | No cognitive deficit (%) | p value | OR (95% CI)        |                                   |
| AA                            | 30     | 14 (37)               | 16 (36)                  | 0.8832  | 1.04 (0.594–1.836) | 0.0809                            |
| AG                            | 35     | 16 (42)               | 19 (42)                  | >0.9999 | 1.0 (0.561–1.781)  |                                   |
| GG                            | 18     | 8 (21)                | 10 (22)                  | 0.8633  | 0.94 (0.483–1.823) |                                   |
| MAF (G)                       | 0.49   | –                     | –                        | –       | –                  |                                   |

MAF, minor-allele frequency; OR, odds ratio; CI, confidence interval. Genotype frequency was analyzed by  $\chi^2$  test (two tailed). Test time was included as a covariate in the logistic regression analyses. \*Statistical significance ( $p < 0.05$ ). The reference group in each of the analyses was the most prevalent genotype.

(ZIKV), are also associated with synapse impairment.<sup>36,47,72</sup> Likewise, we found that the late cognitive dysfunction induced by Spike protein was accompanied by prominent synapse loss in the mouse hippocampus. Recent data have revealed upregulation of genes linked to synapse elimination in SARS-CoV-2-infected human brain organoids and in postmortem brain samples from patients with COVID-19.<sup>73,74</sup> In line with these observations, we found that infusion of Spike protein into the mouse brain induces a late elevation in plasma levels of NFL, an axonal cytoskeleton protein identified as a component of pre- and post-synaptic terminals.<sup>75</sup> Plasma NFL increase can be employed as a marker of synapse loss and disease progression in neurodegenerative diseases, including Alzheimer's disease.<sup>76</sup> Remarkably, some data showed that plasma NFL levels are higher in patients with severe COVID-19 compared with healthy age-matched individuals as well as inversely correlated with cognitive performance in patients with COVID-19,<sup>77,78</sup> reinforcing the translational potential of our model. Collectively, these findings suggest that brain exposure to Spike protein induces synapse loss and behavioral alterations typical of viral encephalitis, leading to prolonged neurological dysfunction that can persist long after recovery from the infectious event.

Microglia are the most abundant immune cell type in the CNS and play a critical role in most neuroinflammatory diseases.<sup>79</sup> In viral encephalitis, microglial cells have protective and detrimental activities depending on the phase of infection.<sup>46</sup> Previous studies have shown that human coronaviruses can reach the CNS and induce neuroinflammation and/or gliosis in mature and immature brain tissues.<sup>16,61,80</sup> Here, we found that the microglial cell line BV-2 was impacted by Spike protein, corroborating recent data showing an increase in proinflammatory mediators in S1-stimulated microglia.<sup>25</sup> Because cultured primary cortical neurons were not directly affected by Spike stimulation, our *in vitro* results indicate that microglia could be seen as the main cell type affected by exposure to SARS-CoV-2 Spike protein.

It is well known that viral infections are often associated with excessive activation of inflammatory and immune responses, which may, in turn, elicit and/or accelerate brain neurodegener-

ation.<sup>81</sup> Here, we found that Spike protein-infused mice presented late microglial activation but not astrocyte reactivity, similar to what has been observed in other animal models of viral encephalitis.<sup>36,47</sup> Increased levels of proinflammatory mediators in the hippocampus and serum were found only at late time points after Spike infusion, showing a temporal correlation with synaptic loss and cognitive dysfunction. Conversely, we found that downregulation of the *IFNAR2* gene occurred shortly after Spike injection, similar to what has been observed in neuronal cells of postmortem samples from patients with COVID-19.<sup>74</sup> This finding corroborates recent evidence demonstrating that SARS-CoV-2 may evade innate immunity through modulation of type I IFN responses.<sup>82</sup> Altogether, our results show that brain exposure to Spike protein induces early negative modulation of the main receptor involved in type I IFN responses, followed by a late proinflammatory process in the hippocampus.

A complement-microglia axis has emerged as one of the key triggers of synapse loss in memory-related diseases.<sup>83</sup> The classical complement cascade, a central player of innate immune pathogen defense, orchestrates synaptic pruning by microglia during physiological and pathological conditions.<sup>43,48,84,85</sup> We have reported previously that hippocampal synapses are phagocytosed by microglia during ZIKV brain infection in a process dependent on C1q and C3.<sup>36</sup> Moreover, Vasek et al.<sup>47</sup> showed hippocampal synapse loss in postmortem samples of patients with WNV neuroinvasive disease as well as complement-dependent microglial synapse engulfment in WNV-infected and recovered mice. Accordingly, we demonstrated that cognitive impairment induced by Spike protein is associated with hippocampal C1q upregulation and microglial engulfment of pre-synaptic terminals. Additionally, chronic C1q neutralization preserved memory function in Spike-infused mice, supporting a role of C1q-mediated synaptic pruning as an important mediator of post-COVID-19 cognitive impairment.

The pattern recognition receptor TLR4 has been implicated in the neuropathology of viral encephalitis, classically associated with memory impairment, including that caused by WNV, Japanese encephalitis virus (JEV), and BDV,<sup>86–88</sup> as well as age-related neurodegenerative diseases.<sup>27,49,89,90</sup> Notably, *in silico*

simulations predicted that the Spike protein could be recognized by the TLR4,<sup>21,22,91</sup> with this interaction activating inflammatory signaling independent of ACE2.<sup>24–26,29</sup> Accordingly, here we found that a single brain infusion of Spike protein induced hippocampal TLR4 upregulation. To gain further insight into the role played by TLR4 in COVID-19-induced brain dysfunction, we first performed pharmacological blockage of TLR4 signal transduction early after Spike protein brain infusion. This strategy significantly prevented the long-term cognitive impairment observed in our model. Likewise, late cognitive impairment induced by Spike protein was absent in TLR4-deficient mice, in accordance with previous findings in animal models of dementia.<sup>90,92</sup> Remarkably, we also found that Spike-induced plasma NFL increase was dependent on TLR4 activation because early TLR4 inhibition mitigated changes in NFL levels. Together, our findings strongly suggest that brain dysfunction in post-COVID-19 is associated with Spike-induced TLR4 signaling in microglial cells.

The engagement of complement and TLRs in signaling cross-talk has been proposed to regulate immune and inflammatory responses in neurodegenerative diseases.<sup>93</sup> Indeed, it has been shown that TLR4 activation induces upregulation of complement components in the mouse hippocampus.<sup>27,94,95</sup> Given the role of complement activation in synaptic pruning, we hypothesized that TLR4 is the molecular switch that regulates microglial synaptic engulfment. Notably, our hypothesis is in agreement with emerging evidence showing a role of TLR4 in Spike-induced microglial responses.<sup>24,25</sup> Olajide et al.<sup>25</sup> found significant inhibition in TNF and IL-6 release in S1 Spike-stimulated BV-2 microglia using the same pharmacological inhibitor used in our study (TAK-242) or in cells transfected with TLR4 small interfering RNA. Similar results using TLR4 pharmacological or genetic blockade have been found in murine and human macrophages. S1 also induces proinflammatory gene expression in primary rat microglia and activates TLR4 signaling in HEK293 transgenic cells.<sup>24</sup> In our model, the delayed response to Spike protein is indeed an intriguing phenomenon, and it is not shared by other TLR4 agonists.<sup>95,96</sup> Our animal model provides evidence of the ability of SARS-CoV-2 Spike protein to induce synapse dysfunction. Using brain organoids, Oliveira et al.<sup>73</sup> described that SARS-CoV-2 infection is able to increase microglial engulfment of postsynaptic termini 72 h after virus inoculation. Thus, it is plausible that TLR4 activation can induce either acute or delayed synaptic dysfunction, depending on the agonist/proinflammatory insult. In light of this, we speculate that this possible uncommon ability of SARS-CoV-2 Spike protein to induce delayed synapse loss could account for occurrence of the intriguing delayed-onset post-COVID-19 cognitive impairment.

Finally, and relevantly, we validated our preclinical findings by examining whether *TLR4* genetic variants could be associated with poor cognitive outcome in patients with COVID-19 with mild disease. In a cohort of patients with mild COVID-19 carrying the GG genotype of the *TLR4*-2604G>A (rs10759931) variant, we identified increased expression of *TLR4* and high risk for cognitive impairment after SARS-CoV-2 infection compared with the GA genotype. The G allele has already been associated with increased risk for different disorders with immunological basis, including cardiovascular diseases,<sup>97</sup> diabetes-associated

retinopathy,<sup>98</sup> cancer,<sup>99</sup> and asthma.<sup>100</sup> On the other hand, the A allele can affect the binding affinity of the *TLR4* promoter to transcription factors, culminating in lower expression of this gene in allele carriers.<sup>101</sup> Taken together, our findings suggest that the complex cross-talk between TLR4, the complement system, and neuroinflammation are important events that determine the development of neurological symptoms in patients with post-COVID-19 syndrome.

The impact of long COVID-19 syndrome is emerging as a major public health concern because of the high prevalence of prolonged neurological symptoms among survivors. Therefore, strategies designed to prevent or treat neurological post-COVID-19 symptoms constitute an unmet clinical need. Cognitive symptoms are common post-acute sequelae of SARS-CoV-2 infection, and although some studies have demonstrated a higher prevalence in severe cases,<sup>102</sup> asymptomatic individuals or those with mild or moderate COVID-19 also report persistent cognitive symptoms.<sup>103</sup> Among severe cases, COVID-19 severity score, mechanical ventilation, and multiorgan support were predictive factors for poorer cognitive outcomes.<sup>102</sup> Because our model was not designed to mimic the respiratory, gastrointestinal, and cardiovascular manifestations that characterize severe acute COVID-19, it may not adequately recapitulate the clinical course of post-COVID-19 syndrome in this population.<sup>102</sup> Nonetheless, longitudinal data indicate that mild SARS-CoV-2 infection is associated with persistent cognitive symptoms,<sup>5,7,8,59,104–107</sup> with delayed symptom onset not only in individuals with pre-existing cognitive risk factors<sup>108</sup> but also in young individuals in the absence of comorbidities.<sup>106</sup> Thus, our model better replicates the cognitive dysfunction associated with the mild rather than severe COVID-19 phenotype. We found that Spike-induced cognitive impairment triggers innate immunity activation through TLR4, culminating in microgliosis, neuroinflammation, and synaptic pruning. The translational value of our model is supported by the correlation between increased plasma NFL and behavioral deficits as well as by the association between *TLR4* genetic status and SARS-CoV-2 cognitive outcomes of patients who recovered from COVID-19. Altogether, our findings indicate key targets for establishment of interventional strategies for prevention and/or treatment of the long-term brain outcomes of COVID-19.

### Limitations of the study

Although we clearly demonstrated that Spike protein can directly trigger an inflammatory cascade that culminates in synaptic dysfunction and cognitive impairment in our model, it is not possible to fully establish the extent of this effect in the context of peripheral or central SARS-CoV-2 infection. Furthermore, our study assessed the effect of Spike protein from the original strain; future studies comparing cognitive disturbances induced by emerging variants are warranted. Also, the effect of subsequent exposure to Spike protein in the absence of vaccination or during breakthrough infection in vaccinated individuals remains to be determined. Last, although our study holds translational potential, our findings are limited by the number of patients and SNPs evaluated and the absence of longitudinal assessments. Thus, in future studies, it will be important to extend these

investigations to a larger group of patients with varying degrees of cognitive impairment.

## STAR★METHODS

Detailed methods are provided in the online version of this paper and include the following:

- **KEY RESOURCES TABLE**
- **RESOURCE AVAILABILITY**
  - Lead contact
  - Materials availability
  - Data and code availability
- **EXPERIMENTAL MODEL AND SUBJECT DETAILS**
  - Animals
  - Spike infusion
  - Pharmacological treatments
  - Study population and cognitive assessment
- **METHOD DETAILS**
  - Behavioral tests
  - Tissue collection
  - Cell culture and treatments
  - RNA extraction and qPCR
  - Immunofluorescence assay
  - FluoroJade B (FJ) staining
  - Enzyme-linked immunosorbent assay (ELISA)
  - Neurofilament light chain (NFL) measurements
  - Genotyping and functional analysis
  - Illustrations
- **QUANTIFICATION AND STATISTICAL ANALYSIS**

## SUPPLEMENTAL INFORMATION

Supplemental information can be found online at <https://doi.org/10.1016/j.celrep.2023.112189>.

## ACKNOWLEDGMENTS

The authors thank Luis F. Fragoso and Ana Claudia Rangel for technical support, Prof. Leda R. Castilho and her team at the Cell Culture Engineering Laboratory (LECC) of COPPE/UFRJ for providing the trimeric Spike protein in the prefusion conformation, and Prof. João B. Calixto (Centro de Inovação e Ensaios Pré-clínicos [CIENP]), Prof. João B. Teixeira da Rocha (Federal University of Santa Maria), and Prof. Andreza F. De Bem (Brazilian Federal University) for thoughtful discussions and critical reading of the manuscript. This work was supported by the Fundação de Amparo à Pesquisa do Estado do Rio de Janeiro (FAPERJ; to F.L.F.-D., G.G.F., L.S.A., L.C.C., S.M.B.A., L.E.B.S., J.L.S., R.d.C., J.R.C., A.T.D.P., S.V.A.-L., G.F.P., and C.P.F.), the Instituto Nacional de Ciência e Tecnologia (INCT) – Inovação em Medicamentos e Identificação de Novos Alvos Terapêuticos – INCT-NOVAMED 465430/2014-7, Brazil (to R.d.C., G.F.P., and C.P.F.), INCT de Biologia Estrutural e Bioimagem – INBEB, Brazil (to J.L.S. and A.T.D.P.), Conselho Nacional de Desenvolvimento Científico e Tecnológico – CNPq, Brazil (to G.G.F., H.P.M.-A., L.E.B.S., J.L.S., J.R.C., R.d.C., A.T.D.P., S.V.A.-L., G.F.P., and C.P.F.), Coordenação de Aperfeiçoamento de Pessoal de Nível Superior-CAPES, Brazil (to E.V.D.L. and T.N.d.S.), Programa de Pesquisa Para o SUS (PPSUS) E-26/210.456/2021, Ministério da Saúde, Brazil, and Instituto D’or de Pesquisa e Ensino, Brazil.

## AUTHOR CONTRIBUTIONS

C.P.F., G.F.P., S.V.A.-L., A.T.D.P., J.R.C., R.d.C., and F.L.F.-D. conceived the study. C.P.F., G.F.P., S.V.A.-L., A.T.P., F.L.F.-D., J.R.C., R.d.C., J.L.S., and

L.E.B.S. contributed to the experimental design. F.L.F.-D., G.G.F., E.V.D.L., L.S.A., H.P.M.-A., L.C.C., S.M.B.A., and T.N.d.S. performed experiments in mice and analyzed the data. Molecular experiments and ELISA were performed and analyzed by F.L.F.-D., L.C.C., S.M.B.A., and A.T.D.P. Histological and immunohistochemistry/cytochemistry analyses were performed by G.G.F., C.P.F., and E.V.D.L. F.L.F.-D., L.E.B.S., L.R., and G.G.F. performed experiments in cell culture. L.A.D. and A.L.S. performed Simoa experiments. E.G.G., M.B.H., K.L.P., C.C.F.V., and S.V.A.-L. recruited patients, collected clinical information, and performed neuropsychological evaluation. L.A.A.L. performed molecular and serological diagnosis of COVID-19. F.L.F.-D. and E.G.G. carried out genotype analyses. F.L.F.-D., G.G.F., E.G.G., C.P.F., G.F.P., S.V.A.-L., A.T.D.P., J.R.C., R.d.C., and L.E.B.S. contributed to critical analysis of the data. F.L.F.-D., C.P.F., A.T.D.P., and G.F.P. wrote the manuscript. All authors read and approved the final version.

## DECLARATION OF INTERESTS

The authors declare no competing interests.

Received: June 21, 2022

Revised: December 16, 2022

Accepted: February 14, 2023

Published: February 17, 2023

## REFERENCES

1. Lamers, M.M., and Haagmans, B.L. (2022). SARS-CoV-2 pathogenesis. *Nat. Rev. Microbiol.* 20, 270–284. <https://doi.org/10.1038/s41579-022-00713-0>.
2. Wiersinga, W.J., Rhodes, A., Cheng, A.C., Peacock, S.J., and Prescott, H.C. (2020). Pathophysiology, transmission, diagnosis, and treatment of coronavirus disease 2019 (COVID-19): a review. *JAMA* 324, 782–793. <https://doi.org/10.1001/jama.2020.12839>.
3. Crook, H., Raza, S., Nowell, J., Young, M., and Edison, P. (2021). Long covid-mechanisms, risk factors, and management. *BMJ* 374, n1648. <https://doi.org/10.1136/bmj.n1648>.
4. Mehandru, S., and Merad, M. (2022). Pathological sequelae of long-haul COVID. *Nat. Immunol.* 23, 194–202. <https://doi.org/10.1038/s41590-021-01104-y>.
5. Taquet, M., Silleit, R., Zhu, L., Mendel, J., Camplisson, I., Dercon, Q., and Harrison, P.J. (2022). Neurological and psychiatric risk trajectories after SARS-CoV-2 infection: an analysis of 2-year retrospective cohort studies including 1 284 437 patients. *Lancet Psychiatr.* 9, 815–827. [https://doi.org/10.1016/S2215-0366\(22\)00260-7](https://doi.org/10.1016/S2215-0366(22)00260-7).
6. Ceban, F., Ling, S., Lui, L.M.W., Lee, Y., Gill, H., Teopiz, K.M., Rodrigues, N.B., Subramaniapillai, M., Di Vincenzo, J.D., Cao, B., et al. (2022). Fatigue and cognitive impairment in Post-COVID-19 Syndrome: a systematic review and meta-analysis. *Brain Behav. Immun.* 101, 93–135. <https://doi.org/10.1016/j.bbi.2021.12.020>.
7. Davis, H.E., Assaf, G.S., McCorkell, L., Wei, H., Low, R.J., Re'em, Y., Redfield, S., Austin, J.P., and Akrami, A. (2021). Characterizing long COVID in an international cohort: 7 months of symptoms and their impact. *EClinicalMedicine* 38, 101019. <https://doi.org/10.1016/j.eclinm.2021.101019>.
8. Subramanian, A., Nirantharakumar, K., Hughes, S., Myles, P., Williams, T., Gokhale, K.M., Taverner, T., Chandan, J.S., Brown, K., Simms-Williams, N., et al. (2022). Symptoms and risk factors for long COVID in non-hospitalized adults. *Nat. Med.* 28, 1706–1714. <https://doi.org/10.1038/s41591-022-01909-w>.
9. Song, E., Zhang, C., Israelow, B., Lu-Culligan, A., Prado, A.V., Skriabine, S., Lu, P., Weizman, O.-E., Liu, F., Dai, Y., et al. (2021). Neuroinvasion of SARS-CoV-2 in human and mouse brain. *J. Exp. Med.* 218, e20202135. <https://doi.org/10.1084/jem.20202135>.
10. Etter, M.M., Martins, T.A., Kulsvehagen, L., Pössnecker, E., Duchemin, W., Hogan, S., Sanabria-Diaz, G., Müller, J., Chiappini, A., Rychen, J.,

- et al. (2022). Severe Neuro-COVID is associated with peripheral immune signatures, autoimmunity and neurodegeneration: a prospective cross-sectional study. *Nat. Commun.* **13**, 6777. <https://doi.org/10.1038/s41467-022-34068-0>.
11. de Melo, G.D., Lazarini, F., Levallois, S., Hautefort, C., Michel, V., Larrous, F., Verillaud, B., Aparicio, C., Wagner, S., Gheusi, G., et al. (2021). COVID-19-related anosmia is associated with viral persistence and inflammation in human olfactory epithelium and brain infection in hamsters. *Sci. Transl. Med.* **13**, eabf8396. <https://doi.org/10.1126/scitranslmed.abf8396>.
  12. Rutkai, I., Mayer, M.G., Hellmers, L.M., Ning, B., Huang, Z., Monjure, C.J., Coyne, C., Silvestri, R., Golden, N., Hensley, K., et al. (2022). Neuropathology and virus in brain of SARS-CoV-2 infected non-human primates. *Nat. Commun.* **13**, 1745. <https://doi.org/10.1038/s41467-022-29440-z>.
  13. Bauer, L., Laksono, B.M., de Vrij, F.M.S., Kushner, S.A., Harschnitz, O., and van Riel, D. (2022). The neuroinvasiveness, neurotropism, and neurovirulence of SARS-CoV-2. *Trends Neurosci.* **45**, 358–368. <https://doi.org/10.1016/j.tins.2022.02.006>.
  14. Hoffmann, M., Kleine-weber, H., Schroeder, S., Mu, M.A., Drosten, C., Po, S., Hoffmann, M., Kleine-weber, H., Schroeder, S., and Kru, N. (2020). SARS-CoV-2 cell entry depends on ACE2 and TMPRSS2 and is blocked by a clinically proven protease inhibitor. *Cell* **181**, 271–280.e8. <https://doi.org/10.1016/j.cell.2020.02.052>.
  15. Ko, C.J., Harigopal, M., Gehlhausen, J.R., Bosenberg, M., McNiff, J.M., and Damsky, W. (2021). Discordant anti-SARS-CoV-2 spike protein and RNA staining in cutaneous peritotic lesions suggests endothelial deposition of cleaved spike protein. *J. Cutan. Pathol.* **48**, 47–52. <https://doi.org/10.1111/cup.13866>.
  16. Matschke, J., Lütgehetmann, M., Hagel, C., Sperhake, J.P., Schröder, A.S., Edler, C., Mushumba, H., Fitzek, A., Allweiss, L., Dandri, M., et al. (2020). Neuropathology of patients with COVID-19 in Germany: a post-mortem case series. *Lancet Neurol.* **19**, 919–929. [https://doi.org/10.1016/S1474-4422\(20\)30308-2](https://doi.org/10.1016/S1474-4422(20)30308-2).
  17. Troyer, Z., Alhusaini, N., Tabler, C.O., Sweet, T., de Carvalho, K.I.L., Schlatzer, D.M., Carias, L., King, C.L., Matreyek, K., and Tilton, J.C. (2021). Extracellular vesicles carry SARS-CoV-2 spike protein and serve as decoys for neutralizing antibodies. *J. Extracell. Vesicles* **10**, e12112. <https://doi.org/10.1002/jev2.12112>.
  18. Rhea, E.M., Logsdon, A.F., Hansen, K.M., Williams, L.M., Reed, M.J., Baumann, K.K., Holden, S.J., Raber, J., Banks, W.A., and Erickson, M.A. (2021). The S1 protein of SARS-CoV-2 crosses the blood-brain barrier in mice. *Nat. Neurosci.* **24**, 368–378. <https://doi.org/10.1038/s41593-020-00771-8>.
  19. Swank, Z., Senussi, Y., Manickas-Hill, Z., Yu, X.G., Li, J.Z., Alter, G., and Walt, D.R. (2022). Persistent circulating SARS-CoV-2 spike is associated with post-acute COVID-19 sequelae. *Clin. Infect. Dis.* **76**, e487–e490. <https://doi.org/10.1093/cid/ciac722>.
  20. Kawasaki, T., and Kawai, T. (2014). Toll-like receptor signaling pathways. *Front. Immunol.* **5**, 461. <https://doi.org/10.3389/fimmu.2014.00461>.
  21. Bhattacharya, M., Sharma, A.R., Mallick, B., Sharma, G., Lee, S.-S., and Chakraborty, C. (2020). Immunoinformatics approach to understand molecular interaction between multi-epitopic regions of SARS-CoV-2 spike protein with TLR4/MD-2 complex. *Infect. Genet. Evol.* **85**, 104587. <https://doi.org/10.1016/j.meegid.2020.104587>.
  22. Choudhury, A., and Mukherjee, S. (2020). In silico studies on the comparative characterization of the interactions of SARS-CoV-2 spike glycoprotein with ACE-2 receptor homologs and human TLRs. *J. Med. Virol.* **92**, 2105–2113. <https://doi.org/10.1002/jmv.25987>.
  23. Aboudounya, M.M., and Heads, R.J. (2021). COVID-19 and toll-like receptor 4 (TLR4): SARS-CoV-2 may bind and activate TLR4 to increase ACE2 expression, facilitating entry and causing hyperinflammation. *Mediat. Inflamm.* **2021**, 8874339. <https://doi.org/10.1155/2021/8874339>.
  24. Frank, M.G., Nguyen, K.H., Ball, J.B., Hopkins, S., Kelley, T., Baratta, M.V., Fleshner, M., and Maier, S.F. (2022). SARS-CoV-2 spike S1 subunit induces neuroinflammatory, microglial and behavioral sickness responses: evidence of PAMP-like properties. *Brain Behav. Immun.* **100**, 267–277. <https://doi.org/10.1016/j.bbi.2021.12.007>.
  25. Olajide, O.A., Iwuanyanwu, V.U., Adegbola, O.D., and Al-Hindawi, A.A. (2022). SARS-CoV-2 spike glycoprotein S1 induces neuroinflammation in BV-2 microglia. *Mol. Neurobiol.* **59**, 445–458. <https://doi.org/10.1007/s12035-021-02593-6>.
  26. Zhao, Y., Kuang, M., Li, J., Zhu, L., Jia, Z., Guo, X., Hu, Y., Kong, J., Yin, H., Wang, X., and You, F. (2021). SARS-CoV-2 spike protein interacts with and activates TLR4. *Cell Res.* **31**, 818–820. <https://doi.org/10.1038/s41422-021-00495-9>.
  27. Yang, J., Wise, L., and Fukuchi, K.-I. (2020). TLR4 cross-talk with NLRP3 inflammasome and complement signaling pathways in Alzheimer's disease. *Front. Immunol.* **11**, 724. <https://doi.org/10.3389/fimmu.2020.00724>.
  28. Albornoz, E.A., Amarilla, A.A., Modhiran, N., Parker, S., Li, X.X., Wijesundara, D.K., Aguado, J., Zamora, A.P., McMillan, C.L.D., Liang, B., et al. (2022). SARS-CoV-2 drives NLRP3 inflammasome activation in human microglia through spike protein. Preprint at *Mol. Psychiatr.* <https://doi.org/10.1038/s41380-022-01831-0>.
  29. Shirato, K., and Kizaki, T. (2021). SARS-CoV-2 spike protein S1 subunit induces pro-inflammatory responses via toll-like receptor 4 signaling in murine and human macrophages. *Heliyon* **7**, e06187. <https://doi.org/10.1016/j.heliyon.2021.e06187>.
  30. Theobald, S.J., Simonis, A., Georgomanolis, T., Kreer, C., Zehner, M., Eisfeld, H.S., Albert, M.-C., Chhen, J., Motameny, S., Erger, F., et al. (2021). Long-lived macrophage reprogramming drives spike protein-mediated inflammasome activation in COVID-19. *EMBO Mol. Med.* **13**, e14150. <https://doi.org/10.15252/emmm.202114150>.
  31. Kim, E.S., Jeon, M.-T., Kim, K.-S., Lee, S., Kim, S., and Kim, D.-G. (2021). Spike proteins of SARS-CoV-2 induce pathological changes in molecular delivery and metabolic function in the brain endothelial cells. *Viruses* **13**, 102021. <https://doi.org/10.3390/v13102021>.
  32. Frere, J.J., Serafini, R.A., Pryce, K.D., Zazhytska, M., Oishi, K., Golyner, I., Panis, M., Zimering, J., Horiuchi, S., Hoagland, D.A., et al. (2022). SARS-CoV-2 infection in hamsters and humans results in lasting and unique systemic perturbations after recovery. *Sci. Transl. Med.* **14**, eabq3059. <https://doi.org/10.1126/scitranslmed.abq3059>.
  33. Dinnon, K.H., 3rd, Leist, S.R., Okuda, K., Dang, H., Fritch, E.J., Gully, K.L., De la Cruz, G., Evangelista, M.D., Asakura, T., Gilmore, R.C., et al. (2022). SARS-CoV-2 infection produces chronic pulmonary epithelial and immune cell dysfunction with fibrosis in mice. *Sci. Transl. Med.* **14**, eabo5070. <https://doi.org/10.1126/scitranslmed.abo5070>.
  34. Huang, C., Wang, Y., Li, X., Ren, L., Zhao, J., Hu, Y., Zhang, L., Fan, G., Xu, J., Gu, X., et al. (2020). Clinical features of patients infected with 2019 novel coronavirus in Wuhan, China. *Lancet (London, England)* **395**, 497–506. [https://doi.org/10.1016/S0140-6736\(20\)30183-5](https://doi.org/10.1016/S0140-6736(20)30183-5).
  35. Nalbandian, A., Sehgal, K., Gupta, A., Madhavan, M.V., McGroder, C., Stevens, J.S., Cook, J.R., Nordvig, A.S., Shalev, D., Sehwat, T.S., et al. (2021). Post-acute COVID-19 syndrome. *Nat. Med.* **27**, 601–615. <https://doi.org/10.1038/s41591-021-01283-z>.
  36. Figueiredo, C.P., Barros-Aragão, F.G.Q., Neris, R.L.S., Frost, P.S., Soares, C., Souza, I.N.O., Zeidler, J.D., Zamberlan, D.C., de Sousa, V.L., Souza, A.S., et al. (2019). Zika virus replicates in adult human brain tissue and impairs synapses and memory in mice. *Nat. Commun.* **10**, 3890. <https://doi.org/10.1038/s41467-019-11866-7>.
  37. Rhea, E.M., Logsdon, A.F., Hansen, K.M., Williams, L.M., Reed, M.J., Baumann, K.K., Holden, S.J., Raber, J., Banks, W.A., and Erickson, M.A. (2021). The S1 protein of SARS-CoV-2 crosses the blood-brain barrier in mice. *Nat. Neurosci.* **24**, 368–378. <https://doi.org/10.1038/s41593-020-00771-8>.
  38. Butowt, R., Meunier, N., Bryche, B., and von Bartheld, C.S. (2021). The olfactory nerve is not a likely route to brain infection in COVID-19: a

- critical review of data from humans and animal models. *Acta Neuropathol.* *141*, 809–822. <https://doi.org/10.1007/s00401-021-02314-2>.
39. Meinhardt, J., Radke, J., Dittmayer, C., Franz, J., Thomas, C., Mothes, R., Laue, M., Schneider, J., Brünink, S., Greuel, S., et al. (2021). Olfactory transmucosal SARS-CoV-2 invasion as a port of central nervous system entry in individuals with COVID-19. *Nat. Neurosci.* *24*, 168–175. <https://doi.org/10.1038/s41593-020-00758-5>.
  40. Bilinska, K., von Bartheld, C.S., and Butowt, R. (2021). Expression of the ACE2 virus entry protein in the nervus terminalis reveals the potential for an alternative route to brain infection in COVID-19. *Front. Cell. Neurosci.* *15*, 674123. <https://doi.org/10.3389/fncel.2021.674123>.
  41. Patri, A., Vargas, M., Buonanno, P., Annunziata, M.C., Russo, D., Stai-bano, S., Servillo, G., and Fabbrocini, G. (2021). From SARS-CoV-2 hematogenous spreading to endothelial dysfunction: clinical-histopathological study of cutaneous signs of COVID-19. *Diagn. Pathol.* *16*, 16. <https://doi.org/10.1186/s13000-021-01075-6>.
  42. Vorhees, C.V., and Williams, M.T. (2006). Morris water maze: procedures for assessing spatial and related forms of learning and memory. *Nat. Protoc.* *1*, 848–858. <https://doi.org/10.1038/nprot.2006.116>.
  43. Hong, S., Beja-Glasser, V.F., Nfonoyim, B.M., Frouin, A., Li, S., Ramakrishnan, S., Merry, K.M., Shi, Q., Rosenthal, A., Barres, B.A., et al. (2016). Complement and microglia mediate early synapse loss in Alzheimer mouse models. *Science* *352*, 712–716. <https://doi.org/10.1126/science.aad8373>.
  44. Colom-Cadena, M., Spiers-Jones, T., Zetterberg, H., Blennow, K., Caggiano, A., DeKosky, S.T., Fillit, H., Harrison, J.E., Schneider, L.S., Scheltens, P., et al. (2020). The clinical promise of biomarkers of synapse damage or loss in Alzheimer's disease. *Alzheimer's Res. Ther.* *12*, 21. <https://doi.org/10.1186/s13195-020-00588-4>.
  45. Shives, K.D., Tyler, K.L., and Beckham, J.D. (2017). Molecular mechanisms of neuroinflammation and injury during acute viral encephalitis. *J. Neuroimmunol.* *308*, 102–111. <https://doi.org/10.1016/j.jneuroim.2017.03.006>.
  46. Chen, Z., Zhong, D., and Li, G. (2019). The role of microglia in viral encephalitis: a review. *J. Neuroinflammation* *16*, 76. <https://doi.org/10.1186/s12974-019-1443-2>.
  47. Vasek, M.J., Garber, C., Dorsey, D., Durrant, D.M., Bollman, B., Soung, A., Yu, J., Perez-Torres, C., Frouin, A., Wilton, D.K., et al. (2016). A complement-microglial axis drives synapse loss during virus-induced memory impairment. *Nature* *534*, 538–543. <https://doi.org/10.1038/nature18283>.
  48. Stevens, B., Allen, N.J., Vazquez, L.E., Howell, G.R., Christopherson, K.S., Nouri, N., Micheva, K.D., Mehalow, A.K., Huberman, A.D., Stafford, B., et al. (2007). The classical complement cascade mediates CNS synapse elimination. *Cell* *131*, 1164–1178. <https://doi.org/10.1016/j.cell.2007.10.036>.
  49. Miron, J., Picard, C., Lafaille-Magnan, M.É., Savard, M., Labonté, A., Breitner, J., Rosa-Neto, P., Auld, D., and Poirier, J.; PREVENT-AD research group (2019). Association of TLR4 with Alzheimer's disease risk and presymptomatic biomarkers of inflammation. *Alzheimers Dement.* *15*, 951–960. <https://doi.org/10.1016/j.jalz.2019.03.012>.
  50. Edén, A., Kanberg, N., Gostner, J., Fuchs, D., Hagberg, L., Andersson, L.-M., Lindh, M., Price, R.W., Zetterberg, H., and Gisslén, M. (2021). CSF biomarkers in patients with COVID-19 and neurologic symptoms: a case series. *Neurology* *96*, e294–e300. <https://doi.org/10.1212/WNL.000000000010977>.
  51. Pilotto, A., Masciocchi, S., Volonghi, I., De Giuli, V., Caprioli, F., Mariotto, S., Ferrari, S., Bozzetti, S., Imarisio, A., Risi, B., et al. (2021). Severe acute respiratory syndrome coronavirus 2 (SARS-CoV-2) encephalitis is a cytokine release syndrome: evidences from cerebrospinal fluid analyses. *Clin. Infect. Dis.* *73*, e3019–e3026. <https://doi.org/10.1093/cid/ciaa1933>.
  52. Sun, B., Tang, N., Peluso, M.J., Iyer, N.S., Torres, L., Donatelli, J.L., Munter, S.E., Nixon, C.C., Rutishauser, R.L., Rodriguez-Barraquer, I., et al. (2021). Characterization and biomarker analyses of post-COVID-19 complications and neurological manifestations. *Cells* *10*, e020386. <https://doi.org/10.3390/cells10020386>.
  53. Hay, M., Ryan, L., Huentelman, M., Konhilas, J., Hoyer-Kimura, C., Beach, T.G., Serrano, G.E., Reiman, E.M., Blennow, K., Zetterberg, H., and Parthasarathy, S. (2021). Serum neurofilament light is elevated in COVID-19 positive adults in the ICU and is associated with Co-morbid cardiovascular disease, neurological complications, and acuity of illness. *Cardiol. Cardiovasc. Med.* *5*, 551–565. <https://doi.org/10.26502/fccm.92920221>.
  54. Prudencio, M., Erben, Y., Marquez, C.P., Jansen-West, K.R., Franco-Mesa, C., Heckman, M.G., White, L.J., Dunmore, J.A., Cook, C.N., Lilley, M.T., et al. (2021). Serum neurofilament light protein correlates with unfavorable clinical outcomes in hospitalized patients with COVID-19. *Sci. Transl. Med.* *13*, eabi7643. <https://doi.org/10.1126/scitranslmed.abi7643>.
  55. Chen, Y.-C., Yip, P.-K., Huang, Y.-L., Sun, Y., Wen, L.-L., Chu, Y.-M., and Chen, T.-F. (2012). Sequence variants of toll like receptor 4 and late-onset Alzheimer's disease. *PLoS One* *7*, e50771. <https://doi.org/10.1371/journal.pone.0050771>.
  56. Yu, J.-T., Miao, D., Cui, W.-Z., Ou, J.-R., Tian, Y., Wu, Z.-C., Zhang, W., and Tan, L. (2012). Common variants in toll-like receptor 4 confer susceptibility to Alzheimer's disease in a Han Chinese population. *Curr. Alzheimer Res.* *9*, 458–466. <https://doi.org/10.2174/156720512800492495>.
  57. Wang, L.-Z., Yu, J.-T., Miao, D., Wu, Z.-C., Zong, Y., Wen, C.-Q., and Tan, L. (2011). Genetic association of TLR4/11367 polymorphism with late-onset Alzheimer's disease in a Han Chinese population. *Brain Res.* *1381*, 202–207. <https://doi.org/10.1016/j.brainres.2011.01.007>.
  58. Monje, M., and Iwasaki, A. (2022). The neurobiology of long COVID. *Neuron* *110*, 3484–3496. <https://doi.org/10.1016/j.neuron.2022.10.006>.
  59. Xu, E., Xie, Y., and Al-Aly, Z. (2022). Long-term neurologic outcomes of COVID-19. *Nat. Med.* *28*, 2406–2415. <https://doi.org/10.1038/s41591-022-02001-z>.
  60. Chen, A.K., Wang, X., McCluskey, L.P., Morgan, J.C., Switzer, J.A., Mehta, R., Tingen, M., Su, S., Harris, R.A., Hess, D.C., and Rutkowski, E.K. (2022). Neuropsychiatric sequelae of long COVID-19: pilot results from the COVID-19 neurological and molecular prospective cohort study in Georgia, USA. *Brain Behav. Immun. Health* *24*, 100491. <https://doi.org/10.1016/j.bbih.2022.100491>.
  61. Jacomy, H., Fragoso, G., Almazan, G., Mushynski, W.E., and Talbot, P.J. (2006). Human coronavirus OC43 infection induces chronic encephalitis leading to disabilities in BALB/C mice. *Virology* *349*, 335–346. <https://doi.org/10.1016/j.virol.2006.01.049>.
  62. Douaud, G., Lee, S., Alfaro-Almagro, F., Arthofer, C., Wang, C., McCarthy, P., Lange, F., Andersson, J.L.R., Griffanti, L., Duff, E., et al. (2022). SARS-CoV-2 is associated with changes in brain structure in UK Biobank. *Nature* *604*, 697–707. <https://doi.org/10.1038/s41586-022-04569-5>.
  63. Lu, Y., Li, X., Geng, D., Mei, N., Wu, P.-Y., Huang, C.-C., Jia, T., Zhao, Y., Wang, D., Xiao, A., and Yin, B. (2020). Cerebral micro-structural changes in COVID-19 patients - an MRI-based 3-month follow-up study. *EClinicalMedicine* *25*, 100484. <https://doi.org/10.1016/j.eclinm.2020.100484>.
  64. Guedj, E., Campion, J.Y., Dudouet, P., Kaphan, E., Bregeon, F., Tissot-Dupont, H., Guis, S., Barthelemy, F., Habert, P., Ceccaldi, M., et al. (2021). (18 F-FDG brain PET hypometabolism in patients with long COVID. *Eur. J. Nucl. Med. Mol. Imag.* *48*, 2823–2833. <https://doi.org/10.1007/s00259-021-05215-4>.
  65. Peng, G.-P., Feng, Z., He, F.-P., Chen, Z.-Q., Liu, X.-Y., Liu, P., and Luo, B.-Y. (2015). Correlation of hippocampal volume and cognitive performances in patients with either mild cognitive impairment or Alzheimer's disease. *CNS Neurosci. Ther.* *21*, 15–22. <https://doi.org/10.1111/cns.12317>.
  66. Ystad, M.A., Lundervold, A.J., Wehling, E., Espeseth, T., Rootwelt, H., Westlye, L.T., Andersson, M., Adolfsdottir, S., Geitung, J.T., Fjell, A.M., et al. (2009). Hippocampal volumes are important predictors for memory function in elderly women. *BMC Med. Imag.* *9*, 17. <https://doi.org/10.1186/1471-2342-9-17>.

67. Mosconi, L., De Santi, S., Li, J., Tsui, W.H., Li, Y., Boppana, M., Laska, E., Rusinek, H., and de Leon, M.J. (2008). Hippocampal hypometabolism predicts cognitive decline from normal aging. *Neurobiol. Aging* 29, 676–692. <https://doi.org/10.1016/j.neurobiolaging.2006.12.008>.
68. Nuovo, G.J., Magro, C., Shaffer, T., Awad, H., Suster, D., Mikhail, S., He, B., Michaille, J.-J., Liechty, B., and Tili, E. (2021). Endothelial cell damage is the central part of COVID-19 and a mouse model induced by injection of the S1 subunit of the spike protein. *Ann. Diagn. Pathol.* 57, 151682. <https://doi.org/10.1016/j.anndiagpath.2020.151682>.
69. Oh, J., Cho, W.-H., Barcelon, E., Kim, K.H., Hong, J., and Lee, S.J. (2022). SARS-CoV-2 spike protein induces cognitive deficit and anxiety-like behavior in mouse via non-cell autonomous hippocampal neuronal death. *Sci. Rep.* 12, 5496. <https://doi.org/10.1038/s41598-022-09410-7>.
70. Peng, L., Bestard-Lorigados, I., and Song, W. (2022). The synapse as a treatment avenue for Alzheimer's Disease. *Mol. Psychiatr.* 27, 2940–2949. <https://doi.org/10.1038/s41380-022-01565-z>.
71. Bossy-Wetzell, E., Schwarzenbacher, R., and Lipton, S.A. (2004). Molecular pathways to neurodegeneration. *Nat. Med.* 10, S2–S9. <https://doi.org/10.1038/nm1067>.
72. Volmer, R., Prat, C.M.A., Le Masson, G., Garenne, A., and Gonzalez-Dunia, D. (2007). Borna disease virus infection impairs synaptic plasticity. *J. Virol.* 81, 8833–8837. <https://doi.org/10.1128/JVI.00612-07>.
73. Oliveira, A.O., Malwade, S., de Sousa, N.R., Goparaju, S.K., Lekander, J.G., Orhan, F., Steponaviciute, L., Schalling, M., Sheridan, S.D., Perlis, R.H., et al. (2022). SARS-CoV-2 promotes microglial synapse elimination in human brain organoids. Preprint at bioRxiv. <https://doi.org/10.1101/2021.07.07.451463>.
74. Yang, A.C., Kern, F., Losada, P.M., Agam, M.R., Maat, C.A., Schmartz, G.P., Fehlmann, T., Stein, J.A., Schaum, N., Lee, D.P., et al. (2021). Dysregulation of brain and choroid plexus cell types in severe COVID-19. *Nature* 595, 565–571. <https://doi.org/10.1038/s41586-021-03710-0>.
75. Yuan, A., Sershen, H., Basavarajappa, B.S., Kumar, A., Hashim, A., Berg, M., Lee, J.H., Sato, Y., Rao, M.V., Mohan, P.S., et al. (2015). Neurofilament subunits are integral components of synapses and modulate neurotransmission and behavior in vivo. *Mol. Psychiatr.* 20, 986–994. <https://doi.org/10.1038/mp.2015.45>.
76. Bridel, C., van Wieringen, W.N., Zetterberg, H., Tijms, B.M., Teunissen, C.E., NFL Group; Alvarez-Cermeño, J.C., Andreasson, U., Axelsson, M., Bäckström, D.C., et al. (2019). Diagnostic value of cerebrospinal fluid neurofilament light protein in neurology: a systematic review and meta-analysis. *JAMA Neurol.* 76, 1035–1048. <https://doi.org/10.1001/jama-neurol.2019.1534>.
77. Kanberg, N., Ashton, N.J., Andersson, L.-M., Yilmaz, A., Lindh, M., Nilsson, S., Price, R.W., Blennow, K., Zetterberg, H., and Gisslén, M. (2020). Neurochemical evidence of astrocytic and neuronal injury commonly found in COVID-19. *Neurology* 95, e1754–e1759. <https://doi.org/10.1212/WNL.0000000000010111>.
78. De Lorenzo, R., Loré, N.I., Finardi, A., Mandelli, A., Cirillo, D.M., Tresoldi, C., Benedetti, F., Ciceri, F., Rovere-Querini, P., Comi, G., et al. (2021). Blood neurofilament light chain and total tau levels at admission predict death in COVID-19 patients. *J. Neurol.* 268, 4436–4442. <https://doi.org/10.1007/s00415-021-10595-6>.
79. Dheen, S.T., Kaur, C., and Ling, E.-A. (2007). Microglial activation and its implications in the brain diseases. *Curr. Med. Chem.* 14, 1189–1197. <https://doi.org/10.2174/092986707780597961>.
80. Vivanti, A.J., Vauloup-Fellous, C., Prevot, S., Zupan, V., Suffee, C., Do Cao, J., Benachi, A., and De Luca, D. (2020). Transplacental transmission of SARS-CoV-2 infection. *Nat. Commun.* 11, 3572. <https://doi.org/10.1038/s41467-020-17436-6>.
81. Chhatbar, C., and Prinz, M. (2021). The roles of microglia in viral encephalitis: from sensome to therapeutic targeting. *Cell. Mol. Immunol.* 18, 250–258. <https://doi.org/10.1038/s41423-020-00620-5>.
82. Thorne, L.G., Bouhaddou, M., Reuschl, A.-K., Zuliani-Alvarez, L., Polacco, B., Pelin, A., Batra, J., Whelan, M.V.X., Hosmillo, M., Fossati, A., et al. (2022). Evolution of enhanced innate immune evasion by SARS-CoV-2. *Nature* 602, 487–495. <https://doi.org/10.1038/s41586-021-04352-y>.
83. Schartz, N.D., and Tenner, A.J. (2020). The good, the bad, and the opportunities of the complement system in neurodegenerative disease. *J. Neuroinflammation* 17, 354. <https://doi.org/10.1186/s12974-020-02024-8>.
84. Schafer, D.P., Lehrman, E.K., Kautzman, A.G., Koyama, R., Mardinly, A.R., Yamasaki, R., Ransohoff, R.M., Greenberg, M.E., Barres, B.A., and Stevens, B. (2012). Microglia sculpt postnatal neural circuits in an activity and complement-dependent manner. *Neuron* 74, 691–705. <https://doi.org/10.1016/j.neuron.2012.03.026>.
85. Severance, E.G., Gressitt, K.L., Buka, S.L., Cannon, T.D., and Yolken, R.H. (2014). Maternal complement C1q and increased odds for psychosis in adult offspring. *Schizophr. Res.* 159, 14–19. <https://doi.org/10.1016/j.schres.2014.07.053>.
86. Han, Y.W., Choi, J.Y., Uyangaa, E., Kim, S.B., Kim, J.H., Kim, B.S., Kim, K., and Eo, S.K. (2014). Distinct dictation of Japanese encephalitis virus-induced neuroinflammation and lethality via triggering TLR3 and TLR4 signal pathways. *PLoS Pathog.* 10, e1004319. <https://doi.org/10.1371/journal.ppat.1004319>.
87. Sabouri, A.H., Marcondes, M.C.G., Flynn, C., Berger, M., Xiao, N., Fox, H.S., and Sarvetnick, N.E. (2014). TLR signaling controls lethal encephalitis in WNV-infected brain. *Brain Res.* 1574, 84–95. <https://doi.org/10.1016/j.brainres.2014.05.049>.
88. Tang, T., Guo, Y., Xu, X., Zhao, L., Shen, X., Sun, L., and Xie, P. (2021). BoDV-1 infection induces neuroinflammation by activating the TLR4/MyD88/IRF5 signaling pathway, leading to learning and memory impairment in rats. *J. Med. Virol.* 93, 6163–6171. <https://doi.org/10.1002/jmv.27212>.
89. Cui, W., Sun, C., Ma, Y., Wang, S., Wang, X., and Zhang, Y. (2020). Inhibition of TLR4 induces M2 microglial polarization and provides neuroprotection via the NLRP3 inflammasome in Alzheimer's disease. *Front. Neurosci.* 14, 444. <https://doi.org/10.3389/fnins.2020.00444>.
90. Balducci, C., Frasca, A., Zotti, M., La Vitola, P., Millhaj, E., Grigoli, E., Iacobellis, M., Grandi, F., Messa, M., Colombo, L., et al. (2017). Toll-like receptor 4-dependent glial cell activation mediates the impairment in memory establishment induced by  $\beta$ -amyloid oligomers in an acute mouse model of Alzheimer's disease. *Brain Behav. Immun.* 60, 188–197. <https://doi.org/10.1016/j.bbi.2016.10.012>.
91. Khan, K., Khan, S.A., Jalal, K., Ul-Haq, Z., and Uddin, R. (2022). Immunoinformatic approach for the construction of multi-epitopes vaccine against omicron COVID-19 variant. *Virology* 572, 28–43. <https://doi.org/10.1016/j.virol.2022.05.001>.
92. Zhong, Q., Zou, Y., Liu, H., Chen, T., Zheng, F., Huang, Y., Chen, C., and Zhang, Z. (2020). Toll-like receptor 4 deficiency ameliorates  $\beta$ 2-microglobulin induced age-related cognition decline due to neuroinflammation in mice. *Mol. Brain* 13, 20. <https://doi.org/10.1186/s13041-020-0559-8>.
93. Okun, E., Griffioen, K.J., Lathia, J.D., Tang, S.-C., Mattson, M.P., and Arumugam, T.V. (2009). Toll-like receptors in neurodegeneration. *Brain Res. Rev.* 59, 278–292. <https://doi.org/10.1016/j.brainresrev.2008.09.001>.
94. Hajishengallis, G., and Lambris, J.D. (2016). More than complementing Toll: complement-Toll-like receptor synergy and crosstalk in innate immunity and inflammation. *Immunol. Rev.* 274, 233–244. <https://doi.org/10.1111/imr.12467>.
95. Xin, Y.-R., Jiang, J.-X., Hu, Y., Pan, J.-P., Mi, X.-N., Gao, Q., Xiao, F., Zhang, W., and Luo, H.-M. (2019). The immune system drives synapse loss during lipopolysaccharide-induced learning and memory impairment in mice. *Front. Aging Neurosci.* 11, 279. <https://doi.org/10.3389/fnagi.2019.00279>.
96. Rosa, J.M., Farré-Alins, V., Ortega, M.C., Navarrete, M., Lopez-Rodriguez, A.B., Palomino-Antolín, A., Fernández-López, E., Vila-Del Sol, V., Decouty, C., Narros-Fernández, P., et al. (2021). TLR4 pathway impairs



- synaptic number and cerebrovascular functions through astrocyte activation following traumatic brain injury. *Br. J. Pharmacol.* 178, 3395–3413. <https://doi.org/10.1111/bph.15488>.
97. Semlali, A., Al Mutairi, M., Oqla Alanazi, I., Awad Aljohi, H., Reddy Parine, N., Alhadheq, A., Al-Jafari, A.A., Mobeirek, A.F., Al Amri, A., Shaik, J.P., et al. (2019). Toll-like receptor 4 polymorphisms in Saudi population with cardiovascular diseases. *Mol. Genet. genomic Med.* 7, e852. <https://doi.org/10.1002/mgg3.852>.
  98. Singh, K., Kant, S., Singh, V.K., Agrawal, N.K., Gupta, S.K., and Singh, K. (2014). Toll-like receptor 4 polymorphisms and their haplotypes modulate the risk of developing diabetic retinopathy in type 2 diabetes patients. *Mol. Vis.* 20, 704–713.
  99. Song, J., Kim, D.Y., Kim, C.S., Kim, H.J., Lee, D.H., Lee, H.M., Ko, W., and Lee, G. (2009). The association between Toll-like receptor 4 (TLR4) polymorphisms and the risk of prostate cancer in Korean men. *Cancer Genet. Cytogenet.* 190, 88–92. <https://doi.org/10.1016/j.cancergen-cyto.2008.12.011>.
  100. Kerkhof, M., Postma, D.S., Brunekreef, B., Reijmerink, N.E., Wijga, A.H., de Jongste, J.C., Gehring, U., and Koppelman, G.H. (2010). Toll-like receptor 2 and 4 genes influence susceptibility to adverse effects of traffic-related air pollution on childhood asthma. *Thorax* 65, 690–697. <https://doi.org/10.1136/thx.2009.119636>.
  101. Ferronato, S., Gomez-Lira, M., Menegazzi, M., Diani, E., Olivato, S., Sartori, M., Scuro, A., Malerba, G., Pignatti, P.F., Romanelli, M.G., and Maz-zucco, S. (2013). Polymorphism -2604G>A variants in TLR4 promoter are associated with different gene expression level in peripheral blood of atherosclerotic patients. *J. Hum. Genet.* 58, 812–814. <https://doi.org/10.1038/jhg.2013.98>.
  102. Hampshire, A., Chatfield, D.A., MPhil, A.M., Jolly, A., Trender, W., Hellyer, P.J., Giovane, M.D., Newcombe, V.F.J., Outtrim, J.G., Warne, B., et al. (2022). Multivariate profile and acute-phase correlates of cognitive deficits in a COVID-19 hospitalised cohort. *EclinicalMedicine* 47, 101417. <https://doi.org/10.1016/j.eclinm.2022.101417>.
  103. Graham, E.L., Clark, J.R., Orban, Z.S., Lim, P.H., Szymanski, A.L., Taylor, C., DiBiase, R.M., Jia, D.T., Balabanov, R., Ho, S.U., et al. (2021). Persistent neurologic symptoms and cognitive dysfunction in non-hospitalized Covid-19 “long haulers”. *Ann. Clin. Transl. Neurol.* 8, 1073–1085. <https://doi.org/10.1002/acn3.51350>.
  104. Manukyan, P., Deviaterekova, A., Velichkovsky, B.B., and Kasatkin, V. (2022). The impact of mild COVID-19 on executive functioning and mental health outcomes in young adults. *Healthcare (Basel)* 10, 1891. <https://doi.org/10.3390/healthcare10101891>.
  105. Hellmuth, J., Barnett, T.A., Asken, B.M., Kelly, J.D., Torres, L., Stephens, M.L., Greenhouse, B., Martin, J.N., Chow, F.C., Deeks, S.G., et al. (2021). Persistent COVID-19-associated neurocognitive symptoms in non-hospitalized patients. *J. Neuroviro.* 27, 191–195. <https://doi.org/10.1007/s13365-021-00954-4>.
  106. Blomberg, B., Mohn, K.G.-I., Brokstad, K.A., Zhou, F., Linchausen, D.W., Hansen, B.-A., Lartey, S., Onyango, T.B., Kuwelker, K., Sævik, M., et al. (2021). Long COVID in a prospective cohort of home-isolated patients. *Nat. Med.* 27, 1607–1613. <https://doi.org/10.1038/s41591-021-01433-3>.
  107. Ayoubkhani, D., Khunti, K., Nafilyan, V., Maddox, T., Humberstone, B., Diamond, I., and Banerjee, A. (2021). Post-covid syndrome in individuals admitted to hospital with covid-19: retrospective cohort study. *BMJ* 372, n693. <https://doi.org/10.1136/bmj.n693>.
  108. Apple, A.C., Oddi, A., Peluso, M.J., Asken, B.M., Henrich, T.J., Kelly, J.D., Pleasure, S.J., Deeks, S.G., Allen, I.E., Martin, J.N., et al. (2022). Risk factors and abnormal cerebrospinal fluid associate with cognitive symptoms after mild COVID-19. *Ann. Clin. Transl. Neurol.* 9, 221–226. <https://doi.org/10.1002/acn3.51498>.
  109. Wrapp, D., Wang, N., Corbett, K.S., Goldsmith, J.A., Hsieh, C.-L., Abiona, O., Graham, B.S., and McLellan, J.S. (2020). Cryo-EM structure of the 2019-nCoV spike in the prefusion conformation. *Science* 367, 1260–1263. <https://doi.org/10.1126/science.abb2507>.
  110. Alvim, R.G.F., Lima, T.M., Rodrigues, D.A.S., Marsili, F.F., Bozza, V.B.T., Higa, L.M., Monteiro, F.L., Abreu, D.P.B., Leitão, I.C., Carvalho, R.S., et al. (2022). From a recombinant key antigen to an accurate, affordable serological test: lessons learnt from COVID-19 for future pandemics. *Biochem. Eng. J.* 186, 108537. <https://doi.org/10.1016/j.bej.2022.108537>.
  111. Giménez-Garzó, C., Fiorillo, A., Ballester-Ferré, M.P., Gallego, J.-J., Casanova-Ferrer, F., Urios, A., Benlloch, S., Martí-Aguado, D., San-Miguel, T., Tosca, J., et al. (2021). A new score unveils a high prevalence of mild cognitive impairment in patients with nonalcoholic fatty liver disease. *J. Clin. Med.* 10, 2806. <https://doi.org/10.3390/jcm10132806>.
  112. Greenfield, E.A. (2017). Sampling and preparation of mouse and rat serum. *Cold Spring Harb. Protoc.* 2017, pdb.prot100271. <https://doi.org/10.1101/pdb.prot100271>.
  113. Diniz, L.P., Almeida, J.C., Tortelli, V., Vargas Lopes, C., Setti-Perdigão, P., Stipursky, J., Kahn, S.A., Romão, L.F., de Miranda, J., Alves-Leon, S.V., et al. (2012). Astrocyte-induced synaptogenesis is mediated by transforming growth factor  $\beta$  signaling through modulation of D-serine levels in cerebral cortex neurons. *J. Biol. Chem.* 287, 41432–41445. <https://doi.org/10.1074/jbc.M112.380824>.
  114. Livak, K.J., and Schmittgen, T.D. (2001). Analysis of relative gene expression data using real-time quantitative PCR and the 2(-Delta Delta C(T)) Method. *Methods* 25, 402–408. <https://doi.org/10.1006/meth.2001.1262>.
  115. Bellesi, M., de Vivo, L., Chini, M., Gilli, F., Tononi, G., and Cirelli, C. (2017). Sleep loss promotes astrocytic phagocytosis and microglial activation in mouse cerebral cortex. *J. Neurosci.* 37, 5263–5273. <https://doi.org/10.1523/JNEUROSCI.3981-16.2017>.
  116. Lopez-Rodriguez, A.B., Siopi, E., Finn, D.P., Marchand-Leroux, C., Garcia-Segura, L.M., Jafarian-Tehrani, M., and Viveros, M.-P. (2015). CB1 and CB2 cannabinoid receptor antagonists prevent minocycline-induced neuroprotection following traumatic brain injury in mice. *Cerebr. Cortex* 25, 35–45. <https://doi.org/10.1093/cercor/bht202>.
  117. Helgason, C.D., Miller, C.L., and Helgason, C.D. (2004). *Basic Cell Culture Protocols*.

## STAR★METHODS

### KEY RESOURCES TABLE

| REAGENT or RESOURCE                                  | SOURCE                                 | IDENTIFIER                                                          |
|------------------------------------------------------|----------------------------------------|---------------------------------------------------------------------|
| <b>Antibodies</b>                                    |                                        |                                                                     |
| Rabbit Polyclonal anti-IBA-1                         | Wako Chemicals USA                     | Cat# 019-19741; RRID:AB_839504                                      |
| Clone 27G12 anti-Synaptophysin                       | Vector Laboratories                    | Cat# S285; RRID:AB_2336747                                          |
| Rabbit monoclonal [EPR15309] to Homer1               | Abcam                                  | Cat# 184955; RRID:AB_2744679                                        |
| Mouse monoclonal Anti-GFAP                           | Sigma                                  | Cat# G3893; RRID:AB_477010                                          |
| Mouse monoclonal Anti-βIII Tubulin                   | Promega                                | Cat# G712A; RRID:AB_430874                                          |
| Mouse TNF (Mono/Mono) ELISA Set                      | BD Biosciences                         | Cat# 555268; RRID:AB_2869055                                        |
| Mouse IL-1 beta/IL-1F2 Quantikine ELISA Kit          | R&D Systems                            | Cat# MLB00C; RRID:AB_2895547                                        |
| anti-NFL                                             | Quanterix                              | Cat #103186                                                         |
| Rabbit monoclonal TMEM-119                           | Abcam                                  | Cat#209064; RRID:AB_2728083                                         |
| <b>Biological samples</b>                            |                                        |                                                                     |
| Human blood                                          | Gaffrée and Guinle University Hospital | N/A                                                                 |
| <b>Chemicals, peptides, and recombinant proteins</b> |                                        |                                                                     |
| Trizol®                                              | Invitrogen                             | Cat# 15596026                                                       |
| FluoroJade B                                         | Histo Chem Inc                         | Cat #MFCD04974901                                                   |
| Fluoroshield mounting medium with DAPI               | Abcam                                  | Cat# ab104139                                                       |
| <b>Critical commercial assays</b>                    |                                        |                                                                     |
| High-Capacity cDNA Reverse Transcription Kit         | Applied Biosystems                     | Cat# 4368813                                                        |
| Power SYBR Green Master Mix                          | Life Technologies                      | Cat# 4367659                                                        |
| BCA Protein Assay                                    | Thermo Scientific                      | Cat# 23227                                                          |
| TaqMan Universal PCR Master Mix                      | Applied Biosystems                     | Cat# 4304437                                                        |
| PureLink Genomic DNA Mini Kit                        | ThermoFisher Scientific                | Cat# K182002                                                        |
| Qubit dsDNA HS Assay Kit                             | ThermoFisher Scientific                | Cat# Q32851                                                         |
| Mouse IL-1 beta/IL-1F2 DuoSet ELISA Kit              | R&D Systems                            | Cat# DY401-05                                                       |
| Mouse TNF ELISA Set II Kit                           | BD Biosciences                         | Cat# 558534                                                         |
| <b>Experimental models: Cell lines</b>               |                                        |                                                                     |
| BV-2                                                 | Donation from Fiocruz                  | None                                                                |
| <b>Oligonucleotides</b>                              |                                        |                                                                     |
| Primers for qPCR, see <a href="#">Table S2</a>       | This paper                             | N/A                                                                 |
| <b>Software and algorithms</b>                       |                                        |                                                                     |
| ImageJ v1.53                                         | NIH                                    | <a href="https://imagej.nih.gov/ij/">https://imagej.nih.gov/ij/</a> |
| Simoa SR-X™ Analyzer                                 | Quanterix                              | <a href="https://www.quanterix.com">https://www.quanterix.com</a>   |
| Prism 8.0                                            | Graphpad                               | <a href="https://www.graphpad.com/">https://www.graphpad.com/</a>   |

### RESOURCE AVAILABILITY

#### Lead contact

Further information and requests for resources and reagents should be directed to and will be fulfilled by the lead contact, Cláudia P. Figueiredo ([claudia@pharma.ufrj.br](mailto:claudia@pharma.ufrj.br)).

#### Materials availability

This study did not generate new unique reagents.

#### Data and code availability

- The original data within the paper will be available from the [lead contact](#) upon request.

- This paper does not report original code.
- Any additional information in this paper is available from the [lead contact](#) upon requests.

## EXPERIMENTAL MODEL AND SUBJECT DETAILS

### Animals

Eight to twelve-week-old male Swiss mice were used in this study. In some experiments, TLR4<sup>-/-</sup> mice on the C57BL/6 background were used. Animals were housed in groups of five per cage with free access to food and water, under a 12 h light/dark cycle, with controlled temperature and humidity. All procedures followed the “Principles of Laboratory Animal Care” (US National Institutes of Health) and were approved by the Institutional Animal Care and Use Committee of the Federal University of Rio de Janeiro, Brazil (protocol number 068/2).

### Spike infusion

The recombinant Spike protein ectodomain from the original SARS-CoV-2 Wuhan strain (amino acids 1–1208) was produced in HEK293 cells and purified in its trimeric prefusion conformation<sup>109</sup> by the Cell Culture Engineering Laboratory (LECC) of COPPE/UFRJ, Brazil.<sup>110</sup> For protein intracerebroventricular (i.c.v.) infusion, mice were anesthetized with 2.5% isoflurane (Cristália; São Paulo, Brazil) using a vaporizer system (Norwell, MA), and a 2.5 mm-long needle was unilaterally inserted 1 mm to the right of the midline point equidistant from each eye and parallel to a line drawn through the anterior base of the eye. Using a Hamilton syringe, 0.65 or 6.5 μg Spike protein (in 5 μL) or vehicle (PBS) were slowly infused (freehand). For the peripheral model, mice received one single subcutaneous (s.c.) injection of the protein (10 μg in 5 μL) or vehicle (PBS). The trials were divided into two distinct stages: early phase (assessments performed up to one week after administration) and late phase (between 30 and 60 days after administration). Body weight and food intake of animals were measured every 5 days, until 60 days after Spike infusion.

### Pharmacological treatments

For TLR4 blockade, TAK-242 (Millipore) was diluted in sterile saline (vehicle) and injected intraperitoneally (ip; 2 mg/kg). Mice received either vehicle or TAK for 7 days beginning immediately after Spike protein i.c.v. administration. For brain C1q blockade, mice received i.c.v. injections of vehicle (PBS) or an antibody against C1q (0.3 μg; Abcam #11861) twice a week for 30 days after S brain infusion.

### Study population and cognitive assessment

Outpatients with post-COVID-19 were evaluated between December 2020 and July 2021 by a multidisciplinary team of neurologists and neuropsychologists at the Gaffrée and Guinle University Hospital (Rio de Janeiro, Brazil). Inclusion criteria included: COVID-19 diagnosis confirmed by PCR or serological diagnosis, fulfilling criteria of mild disease (not requiring hospitalization and symptoms that did not include dyspnea), assessment performed at least 15 days after the end of symptoms, blood collection and neurocognitive evaluation consent. Exclusion criteria included: age under 18 years old; individuals with previously known cognitive impairment or other neuropsychiatrist disorders that could interfere with the test results. All study subjects had their detailed clinical history recorded and were subjected to complete physical and neurological examination. This work was approved by the Brazilian Ethics Committee (CONEP, CAAE 33659620.1.1001.5258), and all participants signed the informed consent term, agreeing to participate in this research.

Neurocognitive status was only assessed using the Symbol Digit Modalities Test (SDMT), a screening test developed to identify individuals with cognitive impairment through the domains of attention, processing speed and motor skills. Considering that regressed scaled scores on age, age-squared, sex, and education were similar between the cohort, patients were divided into two main subgroups, “with cognitive deficit” and “without cognitive deficit”. The raw score of the SDMT is converted to scaled scores ( $M = 10$ ,  $SD = 3$ ) using the cumulative frequency distribution of the test in order to normalize test score distributions.<sup>111</sup>

## METHOD DETAILS

### Behavioral tests

#### Open field test

Animals were placed in the center of an arena (30 × 30 × 45 cm) divided in nine imaginary quadrants, and exploration was assessed for 5 min. The arena was thoroughly cleaned with 70% ethanol in between trials to eliminate olfactory cues. Total locomotor activity and time spent at central or peripheral quadrants were analyzed using ANY-maze software (Stoelting Company).

#### Novel object recognition (NOR) test

The test was carried out in an arena measuring 30 × 30 × 45 cm. Before training, each animal was submitted to a 5-min habituation session in the empty arena. Test objects were made of plastic and had different shapes, colors, sizes, and textures. Innate object preferences or neophobia were excluded in preliminary tests. Mice explored the configuration of two identical objects during a 5-min acquisition trial. After 90 min, mice were submitted to a 5-min retention trial, during which one of the familiar objects was replaced by an unfamiliar new one. Sniffing and touching the object were considered exploratory behavior. Results were expressed

as a percentage of time exploring each object during the training or test sessions, or as total exploration during each session. Data were analyzed using a one-sample Student's *t*-test comparing the mean exploration percentage time for each object with the chance value of 50%. Animals that recognize the familiar object as such (i.e., learn the task) explore the novel object >50% of the total time.

#### **Morris Water Maze (MWM)**

The apparatus used for the water maze task was a circular tank (1.2 m diameter) filled with water maintained at  $20 \pm 0.5^\circ\text{C}$ . The tank was located in a test room containing prominent visual clues. Mice were trained to swim to a 11 cm diameter circular platform submerged 1.5 cm beneath the surface of the water and invisible to the mice while swimming. The platform was located in a fixed position, equidistant from the center and the wall of the tank. Mice were subjected to four training trials per day (inter-trial interval, 10 min). On each trial, mice were placed into the tank at one of four designated start points in a pseudorandom order. Mice were allowed to find and escape onto the submerged platform. If they failed to find the platform within 60 sec, they were manually guided to the platform and allowed to remain for 10 sec. Mice were trained for four consecutive days. The probe trial was assessed 24 hours after the last training session and consisted of a 60 sec free swim in the pool without the platform. Data were collected using the ANY-maze behavioral tracking software (Stoelting).

#### **Rotarod**

The test was performed in a mouse rotarod apparatus (Insight Ltda., Brazil), as previously described. Briefly, mice were individually placed in the apparatus floor for 3 minutes followed by a 2-min habituation session to the cylinder rod. The test phase consisted of three trials (inter-trial interval, 60 min) in which animals were placed on the top of the rod rotating at increasing speed (minimal speed 16 rpm, maximal speed 36 rpm with acceleration rate 3.7 rpm). Latency to fall was recorded for a 5 min period, and results are expressed as average latency in the test phase.

#### **Tissue collection**

Animals were anesthetized (90 mg/kg ketamine and 4.5 mg/kg xylazine, i.p.) before perfusion with ice-cold PBS at different time points. Hippocampal tissues were dissected immediately after perfusion, frozen in liquid nitrogen and stored at  $-80^\circ\text{C}$  before RNA extraction. For immunofluorescence studies, perfusion was performed with 4% PFA, and brains were fixed for 24 h before paraffin processing. To evaluate the serum levels of cytokine, whole blood was collected, aliquoted, and left at room temperature (RT) to be processed at different time points.<sup>112</sup>

#### **Cell culture and treatments**

Primary neuronal cortical culture was prepared as previously described in Diniz 2012.<sup>113</sup> Briefly, dissociated cerebral cortices were harvested from embryonic day 14 Swiss mice and cultured in neurobasal medium (Invitrogen) supplemented with B-27, penicillin, streptomycin, l-glutamine, fungizone and cytosine arabinose, and maintained at  $37^\circ\text{C}$  with 5%  $\text{CO}_2$ . Neurons were seeded at a density of 50,000–150,000 neurons/well on a 13 mm diameter poly-D-lysine-coated well (10  $\mu\text{g}/\text{mL}$ ; Sigma). One week after dissociation, neuronal cell cultures were treated with PBS or Spike protein (1  $\mu\text{g}/\text{mL}$ ) for 24 h. Later, cells were fixed in 4% PFA, 6% sucrose in PBS for 10 min before immunocytochemistry assay.

The murine BV-2 cell line was cultured in DMEM supplemented with 10% FBS, and 1% streptomycin/penicillin, and seeded at a density of 100,000 cells/well on a 13 mm diameter poly-D-lysine-coated well. Next, cells were treated with PBS or Spike protein (1  $\mu\text{g}/\text{mL}$ ) for 24 h and fixed as mentioned above.

#### **RNA extraction and qPCR**

RNA extraction of hippocampal tissue and cell cultures was performed using Trizol® reagent (Invitrogen), in accordance with manufacturer's instructions. Sample concentration and purity was assessed using a NanoDrop 1000 spectrophotometer (ThermoScientific). Only preparations with absorbance ratios >1.8 and no signs of RNA degradation were used. One  $\mu\text{g}$  of total RNA was reverse transcribed using the High-Capacity cDNA Reverse Transcription Kit (Applied Biosystems), according to the manufacturer's instructions. qPCR was performed using a QuantStudio 5 PCR system (Applied Biosystems) with reactions performed in triplicate. Briefly, qPCRs were run using Power SYBR Green PCR Master Mix (Life Technologies), and 10 ng of template cDNA in a 10  $\mu\text{L}$  reaction volume. The primers used are listed in Table S2. Cycle threshold (Ct) values were normalized to a control gene ( $\beta$ -actin) and analyzed using the  $\Delta\Delta\text{Ct}$  method to generate fold change values ( $2^{-\Delta\Delta\text{Ct}}$ ).<sup>114</sup>

#### **Immunofluorescence assay**

Slides containing sections from the dorsal hippocampus (Bregma  $-1.46$  to  $-1.94\text{mm}$ ) of mice were deparaffinized, and antigen retrieval was carried out by incubation in citrate buffer solution (pH 6.0) at  $95^\circ\text{C}$  for 40 min. Afterwards, permeabilization was performed with 0.025% Triton in PBS, followed by incubation with blocking buffer (PBS containing 0.025% Triton, 3% BSA, and 5% normal goat serum) for 2 h. Next, slides were incubated overnight with primary antibodies against Iba-1 (WAKO; 1:800 #019-19741), TMEM119 (Abcam; 1:50 #210405) synaptophysin (Vector Laboratories; 1:200 #S285), Homer-1 (Abcam; 1:100 #184955), or GFAP (Sigma; 1:500 #G3893). For analyze of Iba-1, GFAP and TMEM119 in the mice hippocampus, four confocal Z-stack images of each mice hippocampal section (CA3 and DG) were acquired using a Leica TSE-SPE3 confocal microscope (0,35 $\mu\text{m}/\text{z}$ -stack) or Zeiss Cell Observer Spining Disk Confocal microscope at 630 $\times$  magnification. Each image comprised 9–12 (0.35 $\mu\text{m}/\text{z}$ -stack) optical planes, three of which were analyzed independently as previously described<sup>115</sup> V. Optical density threshold that best discriminated

staining from background was defined using NIH ImageJ and total pixel intensity was determined for each image and data are expressed as integrated optical density. For synaptic puncta, each z-stack was individually analyzed using the ImageJ v1.53 plugin SynQuant automated synapse counter. Microglia morphology was assessed evaluating the number of branches emanating from their soma.<sup>116</sup> Briefly, type I and type II cells were described as surveillant microglia and present smaller soma and less than 5 thin branches. Type III, IV and V microglia are characterized as reactive microglia, and present more than 4 branches, and thicker branches and bigger soma are observed.<sup>116</sup> For astrocytes morphological analyses, sets of images were acquired using 400× magnification and were segmented using threshold tool (fixed parameters) on FIJI ImageJ followed by sholl analysis, set to form concentric circles within the center of astrocytes with 5µm radius. Ten cells were analyzed per mice and only cells with discernible processes were included. To determine synapse engulfment by microglia, fields containing 3–6 Iba-1 positive cells were chosen and Iba-1/Syp colocalization was normalized by the number of Iba positive cells present in the field. Quantitative colocalization of post-(Homer-1) and presynaptic (synaptophysin) markers, or Iba-1 and synaptophysin in control mice were used to normalize the ratio of preserved synaptic puncta and synaptic engulfment, respectively. In graphics, bars represent means ± SEM and each data point represent average of images analyzed from individual mice.

For immunocytochemistry, wells were washed three times with PBS, and incubated for 1 h with blocking buffer, followed by overnight incubation with primary antibodies against β3-tubulin (Promega; 1:1000 #G712A), Iba-1 (1:1000), synaptophysin or Homer-1. For visualization, sections or wells were incubated with AlexaFluor 488- or 546-conjugated secondary antibodies for 2 h at room temperature, washed with PBS and mounted in Fluoroshield with DAPI (Sigma). The β3-tubulin immunoreactivity in cortical neurons, Iba-1 immunoreactivity in BV-2 cells, as well as microglia density and morphology in Iba-1 immunostained brain sections were photographed using a Slight DS-5-M1 digital camera (Nikon, Melville, NY) connected to an epifluorescence Nikon Eclipse 50i light microscope, under a 20 or 40× objective. Cultured cortical neurons optical density for β3-tubulin and Iba-1 was measured using ImageJ v1.53 and normalized by total DAPI stains. Pyknotic nuclei were analyzed using DAPI stains with 400× magnification and normalized by the total DAPI-stained nuclei observed.

### FluoroJade B (FJ) staining

FJ histochemistry was used as indicative of neuronal degeneration. Paraffin-embedded brain tissue sections were sequentially immersed in 100% ethanol for 3 min, 70% ethanol for 1 min, and distilled water for 1 min. Sections were then immersed in 0.06% potassium permanganate for 10 min (to suppress endogenous background signal), and washed with distilled water for 1 min. FJ B staining solution (10 mL of 0.01% FJ aqueous solution added to 90 mL of 0.1% acetic acid in distilled water) was added for 30 min. After staining, sections were rinsed three times in distilled water. Excess water was drained off, and slides were coverslipped with Entellan® mounting medium (Sigma-Aldrich). Sections comprising the hippocampus were imaged on epifluorescence microscopes (Nikon Eclipse 50i) at 200× magnification. Positive neurodegeneration staining controls consisted of sections from the hippocampus of a mouse injected i.c.v. with 36.8 nmol quinolinic acid and euthanized 24 h thereafter.

### Enzyme-linked immunosorbent assay (ELISA)

For cytokine measurements, hippocampus was homogenized in cold RIPA buffer (150 mM NaCl, 1% Triton X-100, 0.5% sodium deoxycholate, 0.1% SDS, 50 mM Tris Base, 2 mM PMSF, pH 8), and supernatant was collected after centrifugation at 14,000 g for 10 min at 4°C. Protein concentration was determined using the BCA Protein Assay (Thermo Scientific). Samples diluted 1:10 in the RIPA buffer were used for the detection of TNF (BD Biosciences) and IL1β (R&D Systems) by ELISA according to manufacturer's instructions. Results were expressed as pg/µg protein.

### Neurofilament light chain (NFL) measurements

Mouse plasma NFL concentration was measured in triplicate using ultra-sensitive single molecule array (Simoa) technique on the Simoa SR-X™ Analyzer, using Simoa NF-Light Advantage according to the manufacturer's instructions (Quanterix). Briefly, plasma samples were thawed at room temperature for one hour and then centrifuged at 10,000 RCF for 5 min at 24°C. Samples were diluted 1:4 with sample diluent and applied to the plate in duplicate. Paramagnetic beads coated with capture anti-NFL were incubated with a biotinylated anti-NFL detection antibody, followed by incubation with a streptavidin-β-galactosidase complex. A fluorescent signal proportional to the concentration of NFL was generated after the addition of the substrate resorufin β-D-galactopyranoside. Controls were used to validate the detection limit of 0.0552 pg/mL. All coefficients of variance (CVs) of duplicate measurements were below 20%.

### Genotyping and functional analysis

#### Genotyping

Two promoter region *TLR4* SNPs, previously implicated in inflammatory and/or neurological disease, were genotyped. Blood samples were collected and centrifuged at 1.500 g at 4°C for 15 min to separate the buffy coat from plasma. Genomic DNA (gDNA) was extracted using the PureLink Genomic DNA Mini Kit (ThermoFisher Scientific). The quality of the gDNA was determined using NanoDrop 2000 (ThermoFisher Scientific) followed by quantification using the Qubit dsDNA HS Assay Kit (ThermoFisher Scientific) and Qubit Fluorometer 3.0 (Thermo Fisher Scientific). The *TLR4* -2604G>A (rs10759931) and *TLR4* - 2272A>G (rs2737190) variants were genotyped with allelic discrimination using TaqMan qPCR system (ThermoFisher Scientific). The probes were produced by

Applied Biosystems [rs10759931 (C\_\_2704046\_10) and rs2737190 (C\_\_2704047\_10)]. Briefly, genotyping was performed in a 20  $\mu$ L reaction mixture containing 10 ng DNA, TaqMan Universal PCR Master Mix (1X), Probe TaqMan Gene Expression Assay (1X), and DNase-free water for the final volume. The reaction was carried out in the following conditions: an UNG incubation step of 2 min at 50°C, polymerase activation for 10 min at 95°C, followed by 40 cycles of 15 s at 95°C for denaturation and 60 s at 60°C for annealing/extension. The amplification and reading of the plates were performed in the QuantStudio 5 Real-Time PCR System (Applied Biosystems). In order to represent the number of minor allele in the genotype, inheritance model 0, 1, and 2 (AA, Aa, and aa) were applied.

### Functional analysis

To understand the difference in expression between the main genotypes of SNP rs10759931, we performed a functional analysis. Randomly, we selected 9 patients with GG and 7 patients with GA genotypes. In total, 15 mL of the peripheral blood sample was collected in EDTA tubes to generate peripheral blood mononuclear cells (PBMCs). Briefly, PBMCs were isolated using density gradient centrifugation using Ficoll-Hypaque according to Helgason 2004.<sup>117</sup> The PBMCs were cultured in RPMI-1640 Medium (Invitrogen, Carlsbad, CA, USA) supplemented with 10% inactivated autologous serum and 1% of antibiotic.  $10^6$  cells were placed into each well of a 6-well plate and stimulated with 1  $\mu$ g of Spike protein for 24 hours and then the analysis of TLR4 expression was performed by qPCR.

### Illustrations

Illustrations in Figures 1, 3 and 4 were created using *MindtheGraph* ([www.mindthegraph.com](http://www.mindthegraph.com); under FLFD subscription) and subsequently modified (free culture Creative Commons license).

### QUANTIFICATION AND STATISTICAL ANALYSIS

The software Prism v8 (GraphPad) was used for all statistical tests, and values of  $p \leq 0.05$  were considered statistically significant. Student's *t*-test was applied to analyze qPCR, ELISA, NFL measurements and immunohistochemical data when they fit into the normal distribution of the data. Mann–Whitney U test was used for non-normal distributed data. For NOR experiments, data were analyzed using a one-sample Student's *t*-test compared to a fixed value of 50%. Kruskal–Wallis test was used for non-normal distributed data. MWM was analyzed using repeated measures or two-way ANOVA followed by Tukey's test, respectively. Allelic frequencies were determined by direct count of the alleles. Genotypic distributions in Hardy–Weinberg equilibrium were evaluated by two-tailed  $\chi^2$ -test linkage disequilibrium (LD) were reproduced by Linkage Disequilibrium Calculator - Homo\_sapiens ([https://grch37.ensembl.org/Homo\\_sapiens/Tools/LD](https://grch37.ensembl.org/Homo_sapiens/Tools/LD)). The significant differences in allelic and genotypic frequencies were evaluated by Fisher's exact test and two-tailed  $\chi^2$ -test. Using STATA software (version 71.0; Stata Corporation, College Station, Texas, USA), logistic regression analysis with offset variables was used to control the confounding effects of different times in the SDMT. Comparison of mRNA levels of different SNP rs10759931 genotypes was carry out by exact parametric Student's *t*-test.

**Supplemental information**

**SARS-CoV-2 Spike protein induces  
TLR4-mediated long-term cognitive dysfunction  
recapitulating post-COVID-19 syndrome in mice**

**Fabricia L. Fontes-Dantas, Gabriel G. Fernandes, Elisa G. Gutman, Emanuelle V. De Lima, Leticia S. Antonio, Mariana B. Hammerle, Hannah P. Mota-Araujo, Lilian C. Colodeti, Suzana M.B. Araújo, Gabrielle M. Froz, Talita N. da Silva, Larissa A. Duarte, Andreza L. Salvio, Karina L. Pires, Luciane A.A. Leon, Claudia Cristina F. Vasconcelos, Luciana Romão, Luiz Eduardo B. Savio, Jerson L. Silva, Robson da Costa, Julia R. Clarke, Andrea T. Da Poian, Soniza V. Alves-Leon, Giselle F. Passos, and Claudia P. Figueiredo**

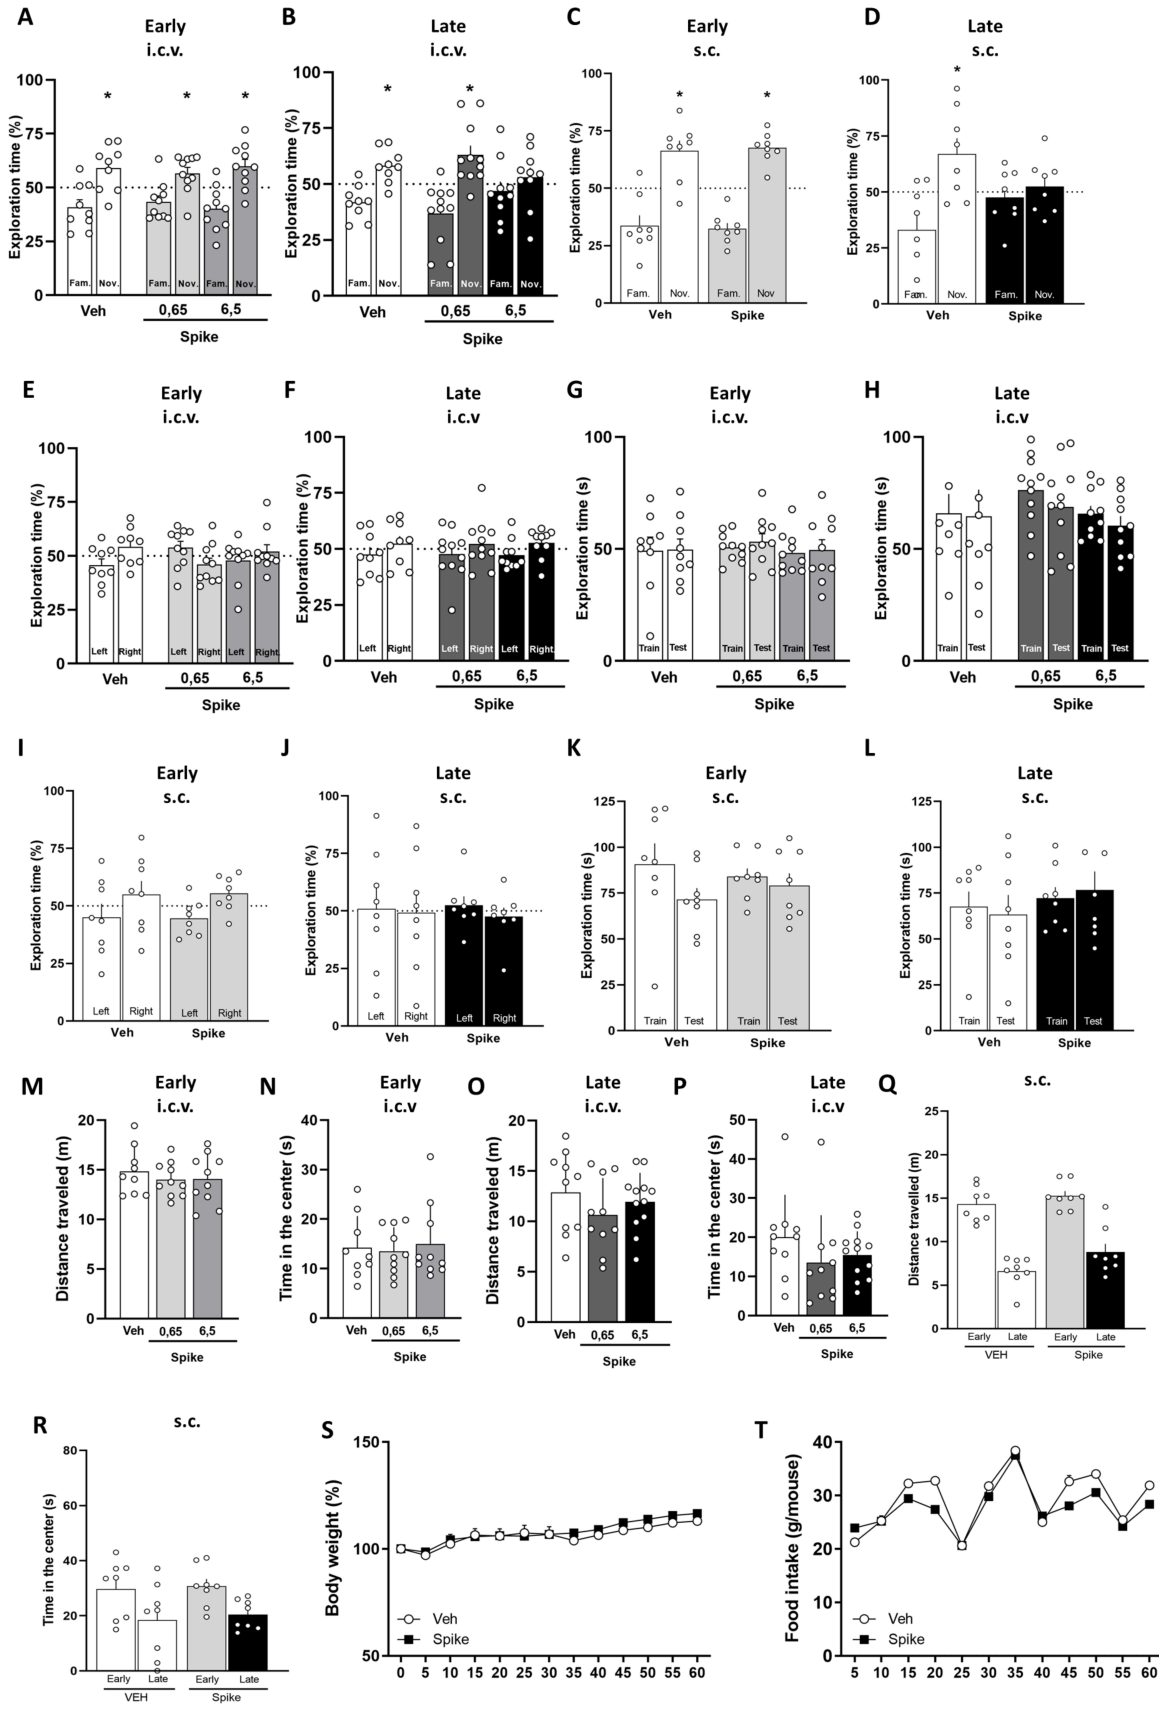



**Supplementary Fig. 1 Behavioral analysis of mice infused with SARS-CoV-2 Spike protein by intracerebroventricular (i.c.v.) or subcutaneous (s.c.) route. Related to Figure 1.** Mice were infused with vehicle (Veh) or Spike protein by i.c.v. (0,65 or 6,5  $\mu\text{g}/\text{site}$ ) or s.c. (10  $\mu\text{g}$ ) route and were evaluated at early (6 days) and late (45 days) time points. **(A and B)** Mice were tested in the novel object recognition (NOR) test at early (**A**;  $t = 2.578$ ,  $*p = 0.0327$  for Veh,  $t = 2.400$   $*p = 0.0399$ , for 0,65  $\mu\text{g}$  Spike,  $t = 3.052$   $*p = 0.0138$ , for 6,5  $\mu\text{g}$  Spike) or late (**B**;  $t = 3.307$ ,  $*p = 0.0107$  for Veh,  $t = 3.214$   $*p = 0.0093$ , for 0,65  $\mu\text{g}$  Spike,  $t = 0.7246$   $p = 0.4871$ , for 6,5  $\mu\text{g}$  Spike) time points after i.c.v. infusion. **(C and D)** Mice were tested in the novel object recognition (NOR) test at early (**C**:  $t = 3.647$ ,  $*p = 0.0082$  for Veh; and  $t = 7.466$ ,  $*p = 0.0001$ , for Spike) or late (**D**)  $t = 2.416$ ,  $*p = 0.0463$  for Veh and  $t = 0.5562$ ,  $p = 0.5954$ , for Spike) time points after s.c. infusion. One-sample Student's t-test compared to the chance level of 50%;  $N = 8-11$  mice per group). **(E-L)** Neither i.c.v. nor s.c. Spike protein infusion affected innate object preferences during the training session (**E and F, I and J**), or exploratory activity (**G and H, K and L**) during the test session of NOR at early and late time points after protein infusion. **(E)** Early stage ( $t = 1.477$ ,  $p = 0.1789$  for Veh,  $t = 1.357$ ,  $p = 0.2079$ , for 0,65  $\mu\text{g}$  Spike,  $t = 0.6648$   $p = 0.5228$ , for 6,5  $\mu\text{g}$  Spike), and **(F)** late stage ( $t = 0.7313$ ,  $p = 0.4855$  for Veh,  $t = 0.7105$   $p = 0.4937$ , for 0,65  $\mu\text{g}$  Spike,  $t = 1.277$ ,  $p = 0.2336$ , for 6,5  $\mu\text{g}$  Spike) after i.c.v. infusion. One-sample Student's t-test compared to the chance level of 50% ( $N = 9-11$  mice per group). **(G)** Early stage ( $F = 1.1411$ ,  $p = 0.3345$  for Training and  $F = 0.2435$ ,  $p = 0.7857$  for Test), and **(H)** late stage ( $F = 0.1117$ ,  $p = 0.8947$  for Training and  $F = 0.3122$ ,  $p = 0.7344$  for Test) after i.c.v. infusion. One-way ANOVA test, followed by Tukey's test ( $N = 9 - 11$  mice per group). **(I)** Early stage ( $t = 0.8437$ ,  $p = 0.4267$  for Veh; and  $t = 2.008$ ,  $p = 0.0846$ , for Spike), and **(J)** late stage ( $t = 0.9215$ ,  $p = 0.9292$  for Veh and  $t = 0.6250$ ,  $p = 0.5518$ , for Spike) after s.c. infusion. One-sample Student's t-test compared to the chance level of 50%;  $N = 8$  mice per group. **(K)** Early stage ( $t = 0.5526$ ,  $p = 0.5893$  for Training and  $t = 0.8203$   $p = 0.4258$ , for Test), and **(L)** Late stage ( $t = 0.4536$ ,  $p = 0.6570$  for Training and  $t = 0.9041$ ,  $p = 0.3812$ , for Test) after s.c. infusion; Student's t-test;  $N = 8$  mice per group. **(M, O and Q)** Total distance traveled and **(N, P and R)** time spent at the center of the open field arena by or i.c.v.- (**M-P**), or s.c.-infused (**Q and R**) mice. **(M)** Early stage ( $F = 0.4086$ ,  $p = 0.6688$ ). **(O)** Late stage ( $F = 1.231$ ,  $p = 0.3074$ ). One-way ANOVA test, followed by Tukey's test;  $N = 9 - 11$  mice per group. **(N)** Early stage ( $F = 0.1360$ ,  $p = 0.8734$ , One-way ANOVA test, followed by Tukey's test). **(P)** Late stage ( $p = 0.1103$ , Kruskal-Wallis test).  $N = 9 - 11$  mice per group. **(Q)**  $t = 1.057$ ,  $p = 0.3085$  for early, and  $t = 1.967$ ,  $p = 0.0693$  for late stage; **(R)**  $t = 0.2321$ ,  $p = 0.8191$  for early, and  $t = 0.3775$ ,  $p = 0.7115$  for late stage. Student's t-test;  $N = 8$  mice per group. **(S)** Body weight ( $F(12, 182) = 0.3791$ ,  $p = 0.9696$ , and **(T)** food intake ( $F(11, 168) = 1.444$ ,  $p = 0.1576$ ) measured for up to 60 days following Veh or Spike s.c. infusion. Two-way ANOVA test followed by Bonferroni ( $N = 8$  mice per group). Bars or points represent means  $\pm$ SEM. Symbols represent individual mice.

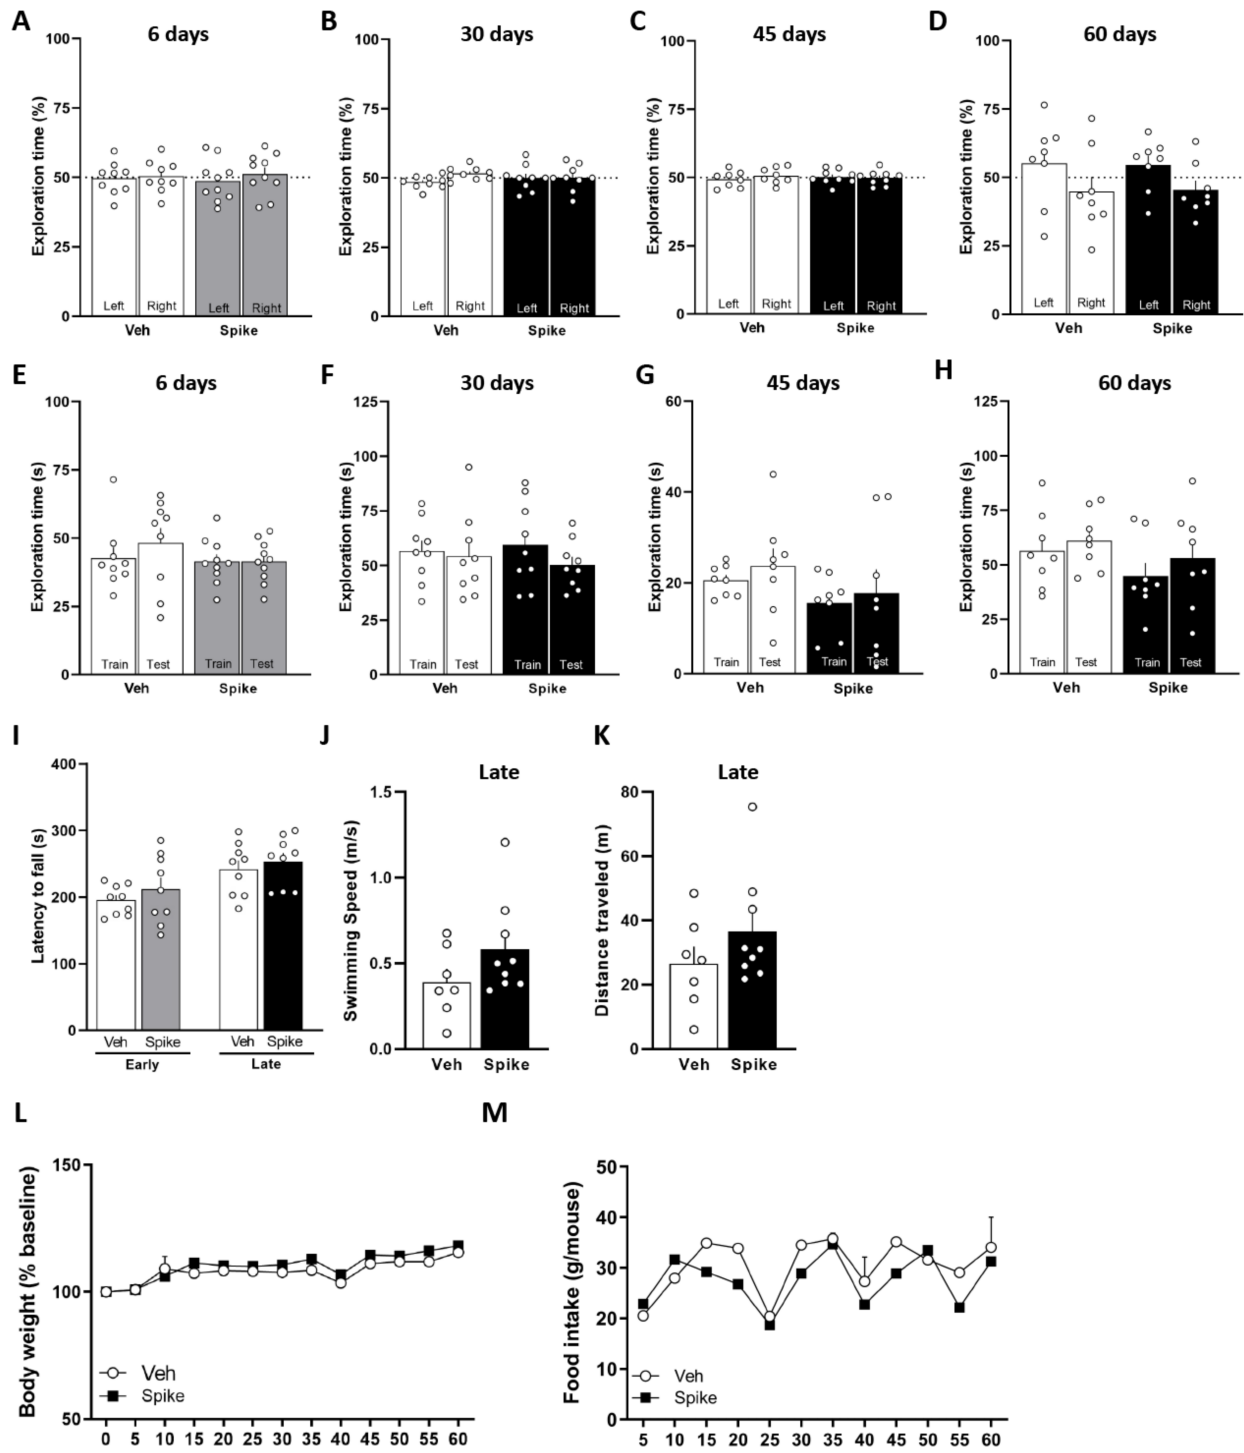

**Supplementary Fig. 2 Controls for behavioral analysis of mice infused with SARS-CoV-2 Spike protein. Related to Figure 1.** Mice were infused with vehicle (Veh) or Spike protein by i.c.v. (6,5  $\mu\text{g}/\text{site}$ ) route, and were evaluated at different time points after infusion. Intracerebroventricular (i.c.v.) infusion of Spike protein had no effect on innate preference for the objects during the training session (**A-D**), or exploratory activity (**E-H**) during the test session of novel object recognition (NOR) test at 6, 30, 45 and 60 days after protein infusion. (**A**) 6 days ( $t = 0.1869$ ,  $p = 0.8564$  for Veh; and  $t = 0.5302$ ,  $p = 0.6088$ , for Spike), (**B**) 30 days ( $t = 2.009$ ,  $p = 0.0794$  for Veh; and  $t = 0.03443$ ,  $p = 0.9734$ , for Spike), (**C**) 45 days ( $t = 0.6465$ ,  $p = 0.5386$  for Veh; and  $t = 0.2022$ ,  $p = 0.8448$ , for Spike), and (**D**) 60 days ( $t = 0.9527$ ,  $p = 0.3725$  for Veh; and  $t = 1.381$ ,  $p = 0.2098$ , for Spike). One-sample Student's t-test compared to the chance level of 50%;  $N = 8 - 10$  mice per group. (**E**) 6 days ( $t = 0.2549$ ,  $p = 0.8019$  for Training and  $t = 1.174$ ,  $p = 0.2565$  for Test), (**F**) 30 days ( $t = 0.3569$ ,  $p = 0.7258$  for Training and  $t = 0.8627$ ,  $p = 0.4011$ , for Test), (**G**) 45 days ( $t = 1.921$ ,  $p = 0.07553$  for Training and  $t = 0.9256$ ,  $p = 0.3793$ , for Test), (**H**) 60 days  $t = 1.346$ ,  $p = 0.1998$  for Training and  $t = 0.8578$ ,  $p = 0.4055$ , for Test). Student's t-test;  $N = 8 - 10$  mice per group. (**I**) No difference between groups was found when mice were tested in the Rotarod task at early (6 days;  $t = 0.9060$ ,  $p = 0.3784$ ) and late (45 days;  $t = 0.6381$ ,  $p = 0.5325$ ) time points following Veh or Spike infusion. Student's t-test;  $N = 9$  mice per group. Spike protein had no effect on swimming speed (**J**  $p = 0.1416$ ) or total distance traveled (**K**  $p = 0.2523$ ) in the Morris Water Maze at the late stage (45 days post infusion). Mann-Whitney U test;  $N = 7 - 9$  mice per group. (**L**) Body weight ( $F(12, 182) = 0.2997$ ,  $p = 0.9888$ , and (**M**) food intake ( $F(11, 168) = 1.592$ ,  $p = 0.1051$ ) measured for up to 60 days following Veh or Spike i.c.v. infusion. Two-way ANOVA test followed by Bonferroni ( $N = 8$  mice per group). Bars or points represent means  $\pm$ SEM. Symbols represent individual mice.

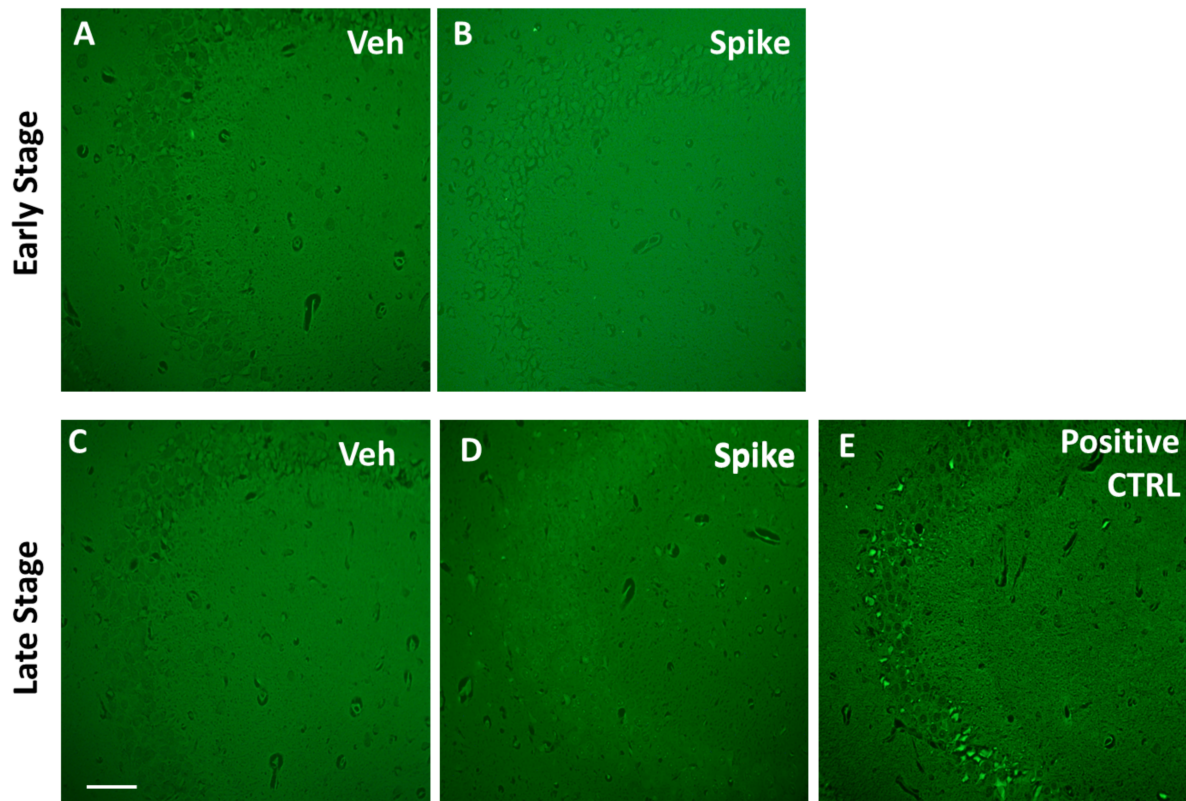

**Supplementary Fig. 3 Analysis of neuronal cell death in the hippocampus of SARS-CoV-2 Spike protein-infused mice. Related to Figure 1.** Mice received an i.c.v. infusion of 6,5  $\mu\text{g}$  SARS-CoV-2 spike protein (Spike) or vehicle (Veh), and brains were processed for Fluoro-Jade B staining. Representative staining of the hippocampal DG region at early (7 days; **A and B**) and late (45 days; **C and D**) time points after infusion.  $N = 4$  mice per group. (**E**) Fluoro-Jade B staining positive control consisted of brain sections of a mouse infused i.c.v. with the neurotoxin quinolinic acid. Scale bar = 50 $\mu\text{m}$ .

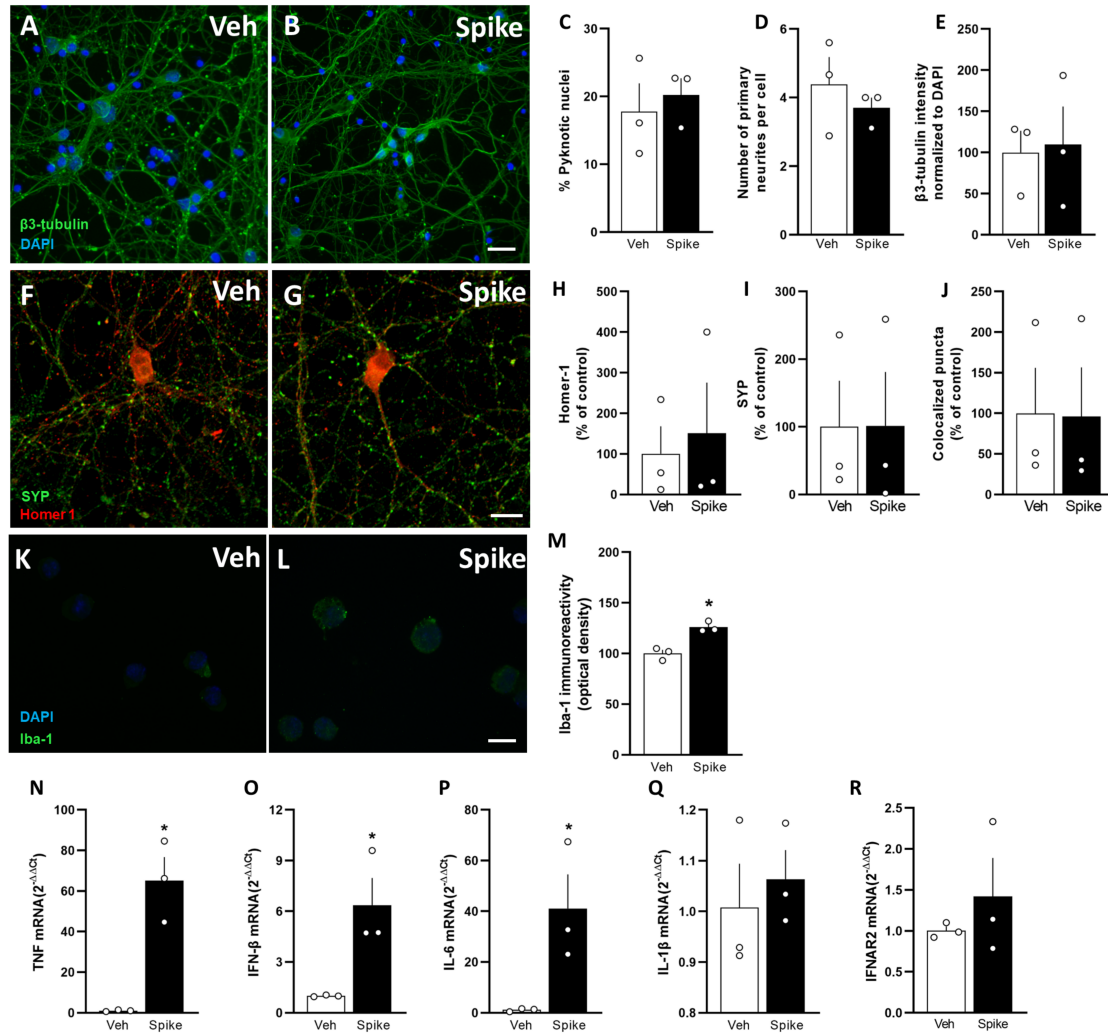

**Supplementary Fig. 4 Effect of SARS-CoV-2 Spike protein incubation in microglial and neuronal cultures. Related to Figure 2.** (A-J) Cultured primary cortical neurons were incubated with Spike protein (1 $\mu$ g/mL) or vehicle (Veh) for 24h, and analyzed by immunocytochemistry. (A and B) Representative images of  $\beta$ 3-tubulin and DAPI immunoreactivity. Scale bar = 50 $\mu$ m. (A-E) Spike protein causes no changes in neither number of pyknotic nuclei (C;  $p > 0.9999$ , Mann-Whitney U test) and primary neurites (D;  $t = 0.8031, p = 0.4669$ , Student's t-test), nor  $\beta$ 3-tubulin intensity (E;  $t = 0.1824, p = 0.8642$ , Student's t-test). (F and G) Representative images of Homer-1 and synaptophysin (SYP) immunoreactivity. Scale bar = 10 $\mu$ m. (F-J) Spike protein also induces no difference in the number of synapses in cortical neurons, as demonstrated by double immunostaining for Homer-1 (H;  $p > 0.9999$ , Mann-Whitney U test), SYP (I;  $t = 0.01403, p = 0.9895$ , Student's t-test), and colocalized Homer-1/SYP puncta (J;  $t = 0.04320, p = 0.9676$ , Student's t-test).  $N = 3$  experiments with independent neuron cultures. (K and L) Representative images of IBA-1 immunoreactivity in BV-2 cells incubated for 24 h with vehicle (Veh; K) or Spike protein (L; 1  $\mu$ g/mL). Scale bar = 50 $\mu$ m. (M) Iba-1 and DAPI immunoreactivity ( $t = 5.567, *p = 0.0051$ ). (N-R) BV2 cells incubated with Spike or Veh were analyzed by qPCR for mRNA levels of TNF (N;  $t = 5.557, *p = 0.0051$ ), IFN- $\beta$  (O;  $t = 3.307, *p = 0.0297$ ), IL-6 (P;  $t = 2.968, *p = 0.0412$ ), IL-1 $\beta$  (Q;  $t = 0.5398, p = 0.6180$ ), and IFNAR2 (R;  $t = 0.8884, p = 0.4245$ ). Student's t-test;  $N = 3$ . Bars represent means  $\pm$ SEM.

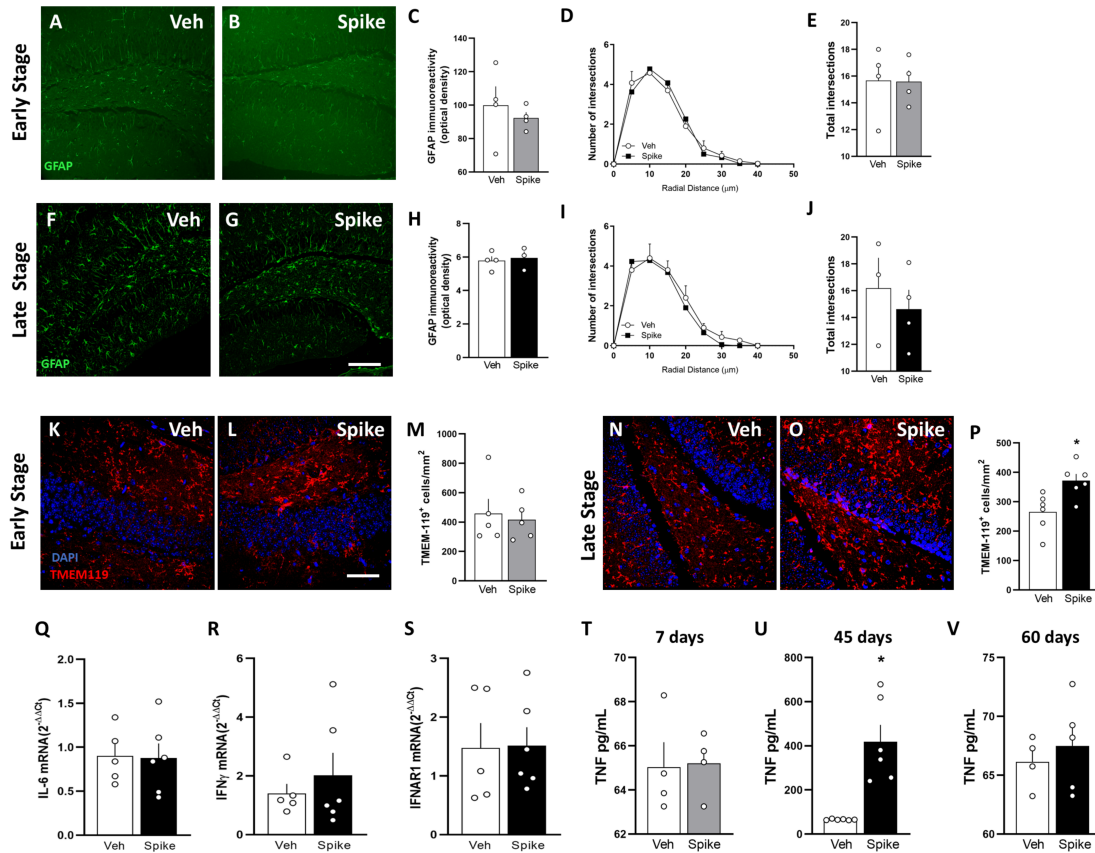

**Supplementary Fig 5 Analysis of glial cell activation and cytokine expression in the hippocampus of SARS-CoV-2 Spike protein-infused mice. Related to Figure 2.** Mice received an i.c.v. infusion of 6,5  $\mu\text{g}$  SARS-CoV-2 spike protein (Spike) or vehicle (Veh), and brains were processed for analysis at early (7 days) and late (45 and 60 days) time points. (A–J) Spike protein had no effect on GFAP immunoreactivity or GFAP-positive cell morphology in the DG region of the hippocampus. Representative images of GFAP immunoreactivity at early (A and B) and late (F and G; 45 days) time points. Scale bar =  $20\mu\text{m}$ . GFAP immunoreactivity (C  $t = 0.6543$ ,  $p = 0.5372$ ), and Sholl analysis (D and E;  $F(8, 54) = 0.5484$ ,  $p = 0.8147$ , and  $t = 0.05462$ ,  $p = 0.9582$ , respectively) at the early stage of the model. GFAP immunoreactivity (H;  $t = 0.3638$ ,  $p = 0.7309$ ), and Sholl analysis (I and J;  $F(8, 45) = 0.3151$ ,  $p = 0.9563$ , and  $t = 0.6199$ ,  $p = 0.5625$ , respectively) at the late stage of the model (45 days). Two-way ANOVA test followed by Bonferroni (D and I), and Student’s t-test (E and J).  $N = 3 - 4$  mice per group. Representative images of TMEM-119 immunoreactivity at early (K and L) and late (N and O; 45 days) time points in hippocampal DG region. Scale bar =  $20\mu\text{m}$ . TMEM-119-positive cells in the hippocampi of Veh- or Spike-infused mice in the early (M;  $t = 0.3669$ ;  $p = 0.7232$ ) and late (P;  $t = 3.036$ ;  $*p = 0.0125$ ; 45 days) stages of the model. Student’s t-test,  $N = 5$  mice per group). (Q–S) qPCR analysis of indicated mRNA isolated from the hippocampus in the late stage of the model (45 days). Spike protein infusion had no effect on mRNA levels of IL-6 (Q;  $t = 0.0979$ ;  $p = 0.9241$ ), IFN $\gamma$  (R;  $t = 0.9586$ ;  $p = 0.3304$ ) and IFNAR1 (S;  $t = 0.3336$ ;  $p = 0.7456$ ).  $N = 5 - 6$  mice per group. (T–V) ELISA analysis of time-dependent serum levels of TNF in Veh- or Spike-infused mice at 7 days (T;  $t = 0.128$ ;  $p = 0.9021$ ), 45 days (U;  $t = 4.636$ ;  $*p = 0.009$ ), and 60 days post-infusion (V;  $t = 0.6137$ ,  $p = 0.5588$ ). Student’s t-test;  $N = 4 - 6$  mice per group. Bars or points represent means  $\pm$ SEM. Symbols represent individual mice.

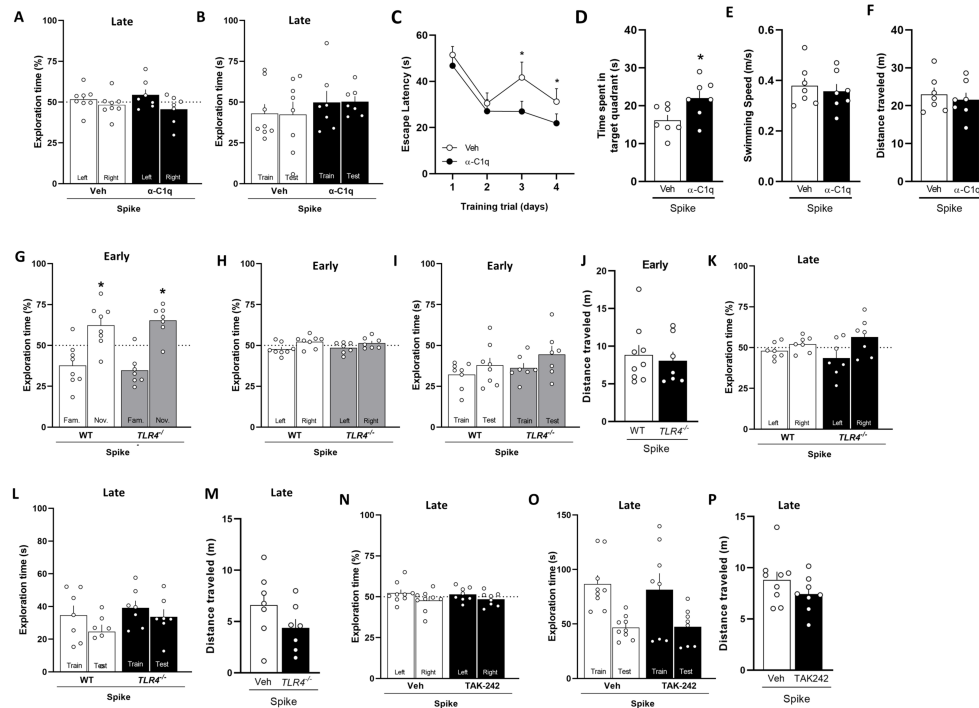

**Supplementary Fig 6 Controls for behavioral analysis of SARS-CoV-2 Spike protein-infused mice with TLR4 or C1q blockade. Related to Figure 3 and Figure 4.** Mice were infused with Spike protein (6,5  $\mu\text{g}/\text{site}$ , i.c.v.), and were treated with vehicle (Veh) or an anti-C1q antibody ( $\alpha\text{-C1q}$ ; 0.3  $\mu\text{g}$  twice a week for 30 days) or the TLR4 inhibitor TAK-242 (2mg/kg i.p., daily for one week). In some experiments, TLR4<sup>-/-</sup> mice on the C57BL/6 background were used. Mice were evaluated in behavioral tests at early (6 days) and/or late (45 days) time points. Spike infusion had no effect on innate preferences for the objects during the training session (**A, H, K and N**) or the exploratory activity during the test session (**B, I, L and O**) of the NOR test ( $N = 7 - 9$  mice per group). (**A**)  $t = 0.7062$ ,  $p = 0.5029$  for Veh; and  $t = 1.323$ ,  $p = 0.2340$ , for  $\alpha\text{-C1q}$ . One-sample Student's t-test compared to the chance level of 50%. (**B**)  $t = 0.7542$ ,  $p = 0.4642$  for Training and  $t = 0.8826$ ,  $p = 0.3835$  for Test. Student's t-test. (**C**) Escape latencies across 4 consecutive training trials  $F(3, 36) = 0.6463$ ,  $p = 0.5904$ , repeated measures ANOVA followed by Tukey's test), and (**D**) time spent in the target quadrant ( $t = 2.439$ ,  $*p = 0.0312$ ), (**E**) swimming speed ( $t = 0.5104$ ,  $p = 0.6190$ ), and (**F**) total distance traveled ( $t = 0.5370$ ,  $p = 0.6011$ ) during the probe trial of the MWM test performed at the late stage. Student's t-test;  $N = 7 - 9$  mice per group). (**G**) Spike protein does not impair object recognition memory in WT and TLR4<sup>-/-</sup> mice, early after protein infusion ( $t = 2.66$   $*p = 0.0323$  for WT and  $t = 4.18$ ;  $*p = 0.0058$  for TLR4<sup>-/-</sup>); one-sample Student's t-test compared to the chance level of 50% ( $N = 7 - 8$  mice per group). (**H**)  $t = 1.756$ ,  $p = 0.1225$  for WT; and  $t = 1.132$ ,  $p = 0.3007$ , for TLR4<sup>-/-</sup>. One-sample Student's t-test compared to the chance level of 50%. (**I**)  $t = 1.005$ ,  $p = 0.3334$  for Training and  $t = 0.9718$ ,  $p = 0.3489$ , for Test.. Student's t-test. (**K**)  $t = 1.128$ ,  $p = 0.3025$  for WT; and  $t = 1.495$ ,  $p = 0.1854$ , for TLR4<sup>-/-</sup>. One-sample Student's t-test compared to the chance level of 50%. (**L**)  $t = 1.433$ ,  $p = 0.1775$  for Training and  $t = 1.433$ ,  $p = 0.1775$  for Test. Student's t-test. (**N**)  $t = 1.081$ ,  $p = 0.3114$  for Veh; and  $t = 0.9918$ ,  $p = 0.3543$  for TAK-242. One-sample Student's t-test compared to the chance level of 50%. (**O**)  $t = 0.3194$ ,  $p = 0.7539$  for Training and  $t = 0.08751$ ,  $p = 0.9314$  for Test. Student's t-test. Genetic (**J and M**) or pharmacological (**P**) inhibition of TLR4 signaling does not affect total distance traveled in the open field arena. (**J**)  $t = 0.4239$ ,  $p = 0.6781$ . (**M**)  $t = 1.498$ ,  $p = 0.1600$ . (**P**)  $t = 1.349$ ,  $p = 0.1974$ . Student's t-test,  $N = 7 - 9$  mice per group. Bars or points represent means  $\pm$ SEM. Symbols represent individual mice.

Supplementary Table 1. Participant demographics of the study sample. Related to Figure 4.

| Sample demographics                                                       | Number of individuals (%)<br>(total N = 86) |
|---------------------------------------------------------------------------|---------------------------------------------|
| Sex                                                                       |                                             |
| Female                                                                    | 70 (81.4%)                                  |
| Male                                                                      | 16 (18.6%)                                  |
| Age (years) <sup>a</sup>                                                  | 45.6 (19-71)                                |
| Time between onset of clinical symptoms and cognitive assessment (months) | 5.89 (1-15)                                 |
| Education <sup>a</sup> (years)                                            | 17.02 (5-28)                                |
| Comorbidities                                                             |                                             |
| 1. None                                                                   | 40 (45.5%)                                  |
| 2. Obesity                                                                | 19 (22.1%)                                  |
| 3. Hypertension                                                           | 17 (19.7%)                                  |
| 4. Diabetes                                                               | 10 (11.6%)                                  |

a = mean (range)



Supplementary Table 2. List of primers used in qPCR analyses for mouse and human samples. Related to Figure 2, Figure 3 and Figure 4.

| Target gene    | Forward primer             | Reverse primer           |
|----------------|----------------------------|--------------------------|
| Mouse          |                            |                          |
| $\beta$ -Actin | GCCCTGAGGCTCTTTTCCAG       | TGCCACAGGATTCCATACCC     |
| TNF            | CCCTCACACTCAGATCATCTTCT    | GCTACGACGACGTGGGCTACAG   |
| IFN $\beta$    | CACAGCCCTCTCCATCAACTA      | CATTTCCGAATGTTTCGTCCT    |
| Il6            | GCTACCAAACCTGGATATAATCAGGA | CCAGGTAGCTATGGTACTCCAGAA |
| IL1- $\beta$   | GTAATGAAAGACGGCACACC-      | ATTAGAAACAGTCCAGCCCA-    |
| IFNAR1         | CTGGTCTGTGAGCTGTACTT       | TCCCCGCAGTATTGATGAGT     |
| IFNAR2         | CTATCGTAATGCTGAAACGG       | CGTAATTCCACAGTCTCTTCT    |
| IFN $\gamma$   | AGCAACAGCAAGGCGAAAA        | CTGGACCTGTGGGTTGTTGA     |
| C1q            | CTCAGGGATGGCTGGTGGCC       | CCTTTGAGACCCGGCCTCCCC    |
| TLR4           | GTCAGTGTGATTGTGGTATCC      | ACCCAGTCCTCATTCTGACTC    |
| Human          |                            |                          |
| $\beta$ -Actin | ACCAACTGGGACGACATGGA       | CCAGAGGCGTACAGGGATAG     |
| TLR4           | AAGCCGAAAGGTGATTGTTG       | CTGAGCAGGGTCTTCTCCAC     |
